# Supplementary material for: Organocatalytic asymmetric Friedel–Crafts alkylation/hemiketalization/lactonization cascade reactions: highly enantioselective synthesis of furo[2,3-b]benzofuranones
Source: Royal Society of Chemistry journal article supplement (doi:10.1039/d0qo00475h), 2020-01-01
Supplement: d0qo00475h1.pdf [file d0qo00475h1.pdf]

# Supporting Information

## **Organocatalytic Asymmetric Friedel-Crafts Alkylation/ Hemiketalization/Lactonization Cascade Reactions: Highly Enantioselective Synthesis of Furo[2,3-*b*]benzofuranones**

Kunhua Xu,<sup>a</sup> Wenming Chen,<sup>b</sup> Xu Chen,<sup>a</sup> Biao Wang,<sup>a</sup> Jun Huang<sup>\*c</sup> and Xu Tian<sup>\*a</sup>

<sup>a</sup>*Key Laboratory of Molecular Target & Clinical Pharmacology and the State Key Laboratory of Respiratory Disease, School of Pharmaceutical Sciences & the Fifth Affiliated Hospital, Guangzhou Medical University, Guangzhou, Guangdong 511436, P. R. China. Email: xtian@gzhmu.edu.cn*

<sup>b</sup>*Department of Pharmaceutical Production Center, The First Affiliated Hospital of Hunan University of Chinese Medicine, Changsha, Hunan 410007, P. R. China.*

<sup>c</sup>*Sino-French Hoffmann Institute, Guangdong Provincial Key Laboratory of Allergy & Clinical Immunology, The second Affiliated Hospital, Guangzhou Medical University, Guangzhou 511436, China  
E-mail: 2007990004@gzhmu.edu.cn.*

## Table of Contents

|                                                                                  |     |
|----------------------------------------------------------------------------------|-----|
| 1. General Information.....                                                      | S3  |
| 2. General Procedure for the Asymmetric Synthesis of <b>3</b> .....              | S3  |
| 3. Synthesis of <b>5</b> .....                                                   | S16 |
| 4. References.....                                                               | S17 |
| 5. Crystal Data of <b>3j</b> .....                                               | S18 |
| 6. <sup>1</sup> H NMR, <sup>13</sup> C NMR, and <sup>19</sup> F NMR Spectra..... | S20 |
| 7. HPLC Chromatography.....                                                      | S49 |

## 1. General information

Catalytic reactions were carried out in Sealing tubes under an air atmosphere with dry toluene. All the 3-ylidene oxindole (**1**)<sup>[1]</sup> and 2-naphthol (**2**)<sup>[2]</sup> have been synthesized following procedures reported in the literature. Other chemical reagent was obtained from commercial sources and was used without further purification. The <sup>1</sup>H and <sup>13</sup>C NMR spectra were recorded on JEOL at 400 MHz for <sup>1</sup>H or at 100 MHz for <sup>13</sup>C, respectively. The chemical shifts ( $\delta$ ) for <sup>1</sup>H and <sup>13</sup>C are given in ppm relative to residual signals of the solvent (CDCl<sub>3</sub> 7.26 ppm <sup>1</sup>H NMR, 77.16 ppm <sup>13</sup>C NMR). Mass spectra and high-resolution mass spectra were measured on a Thermo-DFS mass spectrometer. Optical rotation data were examined in CHCl<sub>3</sub> solution at 25 °C and  $\lambda = 589$  nm. For thin layer chromatography (TLC) analysis throughout this work, Merck precoated TLC plates (silica gel 60 GF<sub>254</sub>, 0.25 mm) were used, Silica gel 60H (200-300 mesh) manufactured by Qingdao Haiyang Chemical Group Co. (China) were used for general chromatography, using UV light as the visualizing agent. Organic solutions were concentrated under reduced pressure on a Büchi rotary evaporator.

## 2. General Procedure for the Asymmetric Synthesis of **3**.

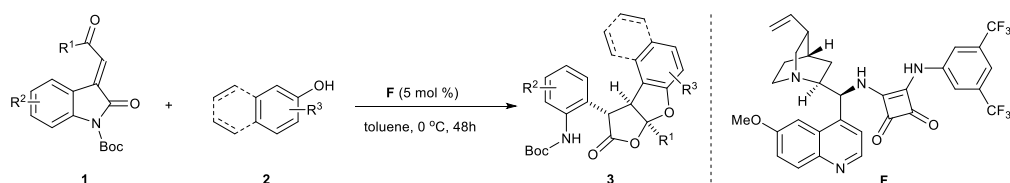

The reaction was carried out with 3-ylideneoxindole **1** (0.1 mmol), 2-naphthol **2** (0.15 mmol) and catalyst **F** (3.2 mg, 5 mol %) in toluene (0.4 mL) at 0 °C for 48 h. The reaction mixture was directly purified by flash column chromatography on a silica gel (Petroleum Ether/EtOAc) to afford the desired product **3**.

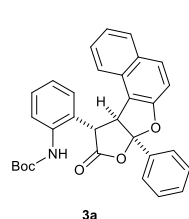

**tert-butyl (2-((7aR,10S,10aS)-9-oxo-7a-phenyl-7a,9,10,10a-tetrahydrofuro[2,3-b]naphtho[1,2-d]furan-10-yl)phenyl)carbamate (3a)**

The reaction was carried out following the general procedure to furnish the crude product.

The reaction was carried out following the general procedure to furnish the crude product.

The title compound was isolated by column chromatography (Petroleum Ether/Ethyl Acetate = 40:1) in

85% yield as white solid. The enantiomeric excess was determined to be 90% ee by HPLC analysis on a Daicel Chiralpak IA column: 95/5 *n*-hexane/*i*-PrOH, flow rate 1.00 mL/min,  $\lambda = 215$  nm,  $t_{\text{minor}} = 12.5$  min,  $t_{\text{major}} = 15.0$  min;  $[\alpha]_{\text{D}}^{25} = -155.0$  ( $c = 0.55$ ,  $\text{CHCl}_3$ ), m.p. 90 – 92 °C.  $^1\text{H}$  NMR (400 MHz,  $\text{CDCl}_3$ )  $\delta$  7.92 (d,  $J = 8.8$  Hz, 2H), 7.82 (d,  $J = 8.0$  Hz, 1H), 7.63 – 7.60 (m, 2H), 7.54 (br s, 1H), 7.52 – 7.48 (m, 3H), 7.46 – 7.39 (m, 2H), 7.37 – 7.32 (m, 2H), 7.24 (d,  $J = 8.0$  Hz, 1H), 7.0 (t,  $J = 7.6$  Hz, 1H), 6.78 (d,  $J = 8.0$  Hz, 1H), 4.90 (d,  $J = 2.4$  Hz, 1H), 4.69 (d,  $J = 2.4$  Hz, 1H), 1.43 (s, 9H) ppm.  $^{13}\text{C}$  NMR (100 MHz,  $\text{CDCl}_3$ )  $\delta$  175.8, 154.9, 153.8, 137.8, 137.3, 131.8, 130.7, 130.2, 129.6, 129.5, 129.2, 129.1, 128.4, 126.3, 125.5, 125.2, 124.5, 121.9, 118.4, 117.7, 112.3, 80.8, 55.5, 48.5, 28.4 ppm. HR-MS (ESI)  $m/z$  calcd for  $\text{C}_{31}\text{H}_{27}\text{NO}_5$   $[\text{M}+\text{Na}]^+$  516.17814, found 516.17844.

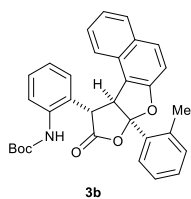

***tert*-butyl (2-((7a*R*,10*S*,10a*S*)-9-oxo-7a-(*o*-tolyl)-7a,9,10,10a-tetrahydrofuro[2,3-*b*]naphtho[1,2-*d*]furan-10-yl)phenyl)carbamate (3b)**

The reaction was carried out following the general procedure to furnish the crude product.

The title compound was isolated by column chromatography (Petroleum Ether/Ethyl Acetate = 40:1) in 63% yield as white solid. The enantiomeric excess was determined to be 90% ee by HPLC analysis on a Daicel Chiralpak AD column: 80/20 *n*-hexane/*i*-PrOH, flow rate 1.00 mL/min,  $\lambda = 215$  nm,  $t_{\text{major}} = 6.2$  min,  $t_{\text{minor}} = 7.4$  min;  $[\alpha]_{\text{D}}^{25} = -76.0$  ( $c = 0.37$ ,  $\text{CHCl}_3$ ), m.p. 88 – 90 °C.  $^1\text{H}$  NMR (400 MHz,  $\text{CDCl}_3$ )  $\delta$  7.96 – 7.93 (m, 2H), 7.80 (d,  $J = 8.0$  Hz, 1H), 7.65 (br s, 1H), 7.62 (d,  $J = 7.6$  Hz, 1H), 7.52 – 7.48 (m, 1H), 7.46 – 7.40 (m, 2H), 7.36 – 7.30 (m, 4H), 7.28 – 7.24 (m, 2H), 6.86 (t,  $J = 7.6$  Hz, 1H), 6.49 (d,  $J = 7.6$  Hz, 1H), 4.93 (s, 1H), 4.76 (d,  $J = 1.2$  Hz, 1H), 2.29 (s, 3H), 1.44 (s, 9H) ppm.  $^{13}\text{C}$  NMR (100 MHz,  $\text{CDCl}_3$ )  $\delta$  175.3, 154.4, 153.9, 137.3, 136.3, 134.9, 132.6, 132.2, 130.8, 130.4, 129.6, 129.4, 129.0, 128.4, 127.0, 126.6, 126.3, 126.1, 125.8, 125.0, 124.5, 121.8, 118.4, 112.5, 80.8, 54.1, 47.5, 28.4, 20.5 ppm. HR-MS (ESI)  $m/z$  calcd for  $\text{C}_{32}\text{H}_{29}\text{NO}_5$   $[\text{M}+\text{Na}]^+$  530.19379, found 530.19358.

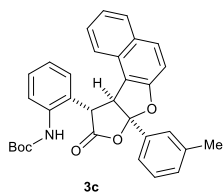

***tert*-butyl (2-((7a*R*,10*S*,10a*S*)-9-oxo-7a-(*m*-tolyl)-7a,9,10,10a-tetrahydrofuro[2,3-*b*]naphtho[1,2-*d*]furan-10-yl)phenyl)carbamate (3c)**

The reaction was carried out following the general procedure to furnish the crude product. The title compound was isolated by column chromatography (Petroleum

Ether/Ethyl Acetate = 40:1) in 61% yield as white solid. The enantiomeric excess was determined to be

88% ee by HPLC analysis on a Daicel Chiralpak AD column: 80/20 *n*-hexane/*i*-PrOH, flow rate 1.00 mL/min,  $\lambda = 254$  nm,  $t_{\text{minor}} = 4.9$  min,  $t_{\text{major}} = 6.1$  min,  $[\alpha]_{\text{D}}^{25} = -118.0$  ( $c = 0.55$ ,  $\text{CHCl}_3$ ), m.p. 85 – 87 °C.  $^1\text{H}$  NMR (400 MHz,  $\text{CDCl}_3$ )  $\delta$  7.93 – 7.91 (m, 2H), 7.81 (d,  $J = 8.0$  Hz, 1H), 7.54 (br s, 1H), 7.47 – 7.42 (m, 2H), 7.40 – 7.36 (m, 4H), 7.35 – 7.30 (m, 3H), 7.23 (d,  $J = 8.0$  Hz, 1H), 7.00 (t,  $J = 7.2$  Hz, 1H), 6.80 (d,  $J = 7.6$  Hz, 1H), 4.88 (d,  $J = 2.4$  Hz, 1H), 4.67 (d,  $J = 2.8$  Hz, 1H), 2.40 (s, 3H), 1.42 (s, 9H) ppm.  $^{13}\text{C}$  NMR (100 MHz,  $\text{CDCl}_3$ )  $\delta$  175.9, 154.9, 153.8, 139.0, 137.7, 137.3, 131.7, 130.9, 130.7, 129.6, 129.5, 129.1, 129.0, 128.4, 126.4, 126.1, 125.2, 124.5, 122.6, 121.9, 118.4, 117.8, 112.3, 80.8, 55.4, 48.4, 28.4, 21.6 ppm. HR-MS (ESI)  $m/z$  calcd for  $\text{C}_{32}\text{H}_{29}\text{NO}_5$   $[\text{M}+\text{Na}]^+$  530.19379, found 530.19365.

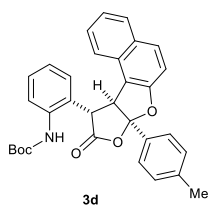

***tert*-butyl (2-((7a*R*,10*S*,10a*S*)-9-oxo-7a-(*p*-tolyl)-7a,9,10,10a-tetrahydrofuro[2,3-*b*]naphtho[1,2-*d*]furan-10-yl)phenyl)carbamate (3d)**

The reaction was carried out following the general procedure to furnish the crude product. The title compound was isolated by column chromatography (Petroleum Ether/Ethyl Acetate = 40:1) in 63% yield as white solid. The enantiomeric excess was determined to be 86% ee by HPLC analysis on a Daicel Chiralpak AD column: 80/20 *n*-hexane/*i*-PrOH, flow rate 1.00 mL/min,  $\lambda = 215$  nm,  $t_{\text{minor}} = 8.5$  min,  $t_{\text{major}} = 9.7$  min,  $[\alpha]_{\text{D}}^{25} = -96.0$  ( $c = 0.53$ ,  $\text{CHCl}_3$ ), m.p. 126 – 128 °C.  $^1\text{H}$  NMR (400 MHz,  $\text{CDCl}_3$ )  $\delta$  7.93 – 7.90 (m, 2H), 7.81 (d,  $J = 8.0$  Hz, 1H), 7.55 (br s, 1H), 7.50 – 7.47 (m, 2H), 7.45 – 7.38 (m, 2H), 7.37 – 7.33 (m, 1H), 7.30 (t,  $J = 9.2$  Hz, 3H), 7.23 (d,  $J = 8.4$  Hz, 1H), 7.01 (td,  $J = 8.0, 0.8$  Hz, 1H), 6.82 (d,  $J = 7.6$  Hz, 1H), 4.87 (d,  $J = 2.8$  Hz, 1H), 4.67 (d,  $J = 2.8$  Hz, 1H), 2.44 (s, 3H), 1.42 (s, 9H) ppm.  $^{13}\text{C}$  NMR (100 MHz,  $\text{CDCl}_3$ )  $\delta$  175.9, 154.9, 153.8, 140.2, 137.2, 134.9, 131.7, 130.6, 129.72, 129.65, 129.5, 129.1, 128.4, 126.4, 125.4, 125.2, 124.4, 121.9, 118.5, 118.0, 112.3, 80.7, 55.4, 48.5, 28.3, 21.4 ppm. HR-MS (ESI)  $m/z$  calcd for  $\text{C}_{32}\text{H}_{29}\text{NO}_5$   $[\text{M}+\text{Na}]^+$  530.19379, found 530.19358.

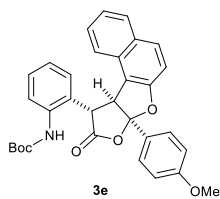

***tert*-butyl (2-((7a*R*,10*S*,10a*S*)-7a-(4-methoxyphenyl)-9-oxo-7a,9,10,10a-tetrahydrofuro[2,3-*b*]naphtho[1,2-*d*]furan-10-yl)phenyl)carbamate (3e)**

The reaction was carried out following the general procedure to furnish the crude product. The title compound was isolated by column chromatography (Petroleum Ether/Ethyl Acetate = 20:1) in 73% yield as white solid. The enantiomeric excess was determined to be

93% ee by HPLC analysis on a Daicel Chiralpak AD column: 80/20 hexane/*i*-PrOH, flow rate 1.00 mL/min,  $\lambda = 215$  nm,  $t_{\text{minor}} = 11.0$  min,  $t_{\text{major}} = 14.7$  min;  $[\alpha]_{\text{D}}^{25} = -85.0$  ( $c = 0.5$ ,  $\text{CHCl}_3$ ), m.p. 130 – 132 °C.  $^1\text{H}$  NMR (400 MHz,  $\text{CDCl}_3$ )  $\delta$  7.93 – 7.90 (m, 2H), 7.82 (d,  $J = 7.6$  Hz, 1H), 7.57 (br s, 1H), 7.53 (dd,  $J = 6.4, 2.4$  Hz, 2H), 7.47 – 7.39 (m, 2H), 7.37 – 7.33 (m, 1H), 7.31 (d,  $J = 8.8$  Hz, 1H), 7.24 (d,  $J = 8.0$  Hz, 1H), 7.03 (dd,  $J = 7.2, 1.2$  Hz, 1H), 6.99 (dd,  $J = 6.8, 2.0$  Hz, 2H), 6.82 (d,  $J = 7.6$  Hz, 1H), 4.87 (d,  $J = 2.8$  Hz, 1H), 4.68 (d,  $J = 2.4$  Hz, 1H), 3.87 (s, 3H), 1.43 (s, 9H) ppm.  $^{13}\text{C}$  NMR (100 MHz,  $\text{CDCl}_3$ )  $\delta$  175.8, 160.9, 154.8, 153.9, 137.2, 131.7, 130.6, 129.8, 129.6, 129.5, 129.1, 128.3, 127.0, 126.4, 125.3, 124.4, 121.9, 118.4, 118.0, 114.3, 112.3, 80.8, 55.6, 55.3, 48.5, 28.3 ppm. HR-MS (ESI)  $m/z$  calcd for  $\text{C}_{32}\text{H}_{29}\text{NO}_6$   $[\text{M}+\text{Na}]^+$  546.18871, found 546.18845.

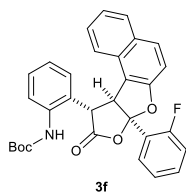

***tert*-butyl (2-((7a*R*,10*S*,10a*S*)-7a-(2-fluorophenyl)-9-oxo-7a,9,10,10a-tetrahydrofuro[2,3-*b*]naphtho[1,2-*d*]furan-10-yl)phenyl)carbamate (3f)**

The reaction was carried out following the general procedure to furnish the crude product.

The title compound was isolated by column chromatography (Petroleum Ether/Ethyl Acetate = 40:1) in 80% yield as white solid. The enantiomeric excess was determined to be 90% ee by HPLC analysis on a Daicel Chiralpak IA column: 90/10 *n*-hexane/*i*-PrOH, flow rate 1.00 mL/min,  $\lambda = 254$  nm,  $t_{\text{minor}} = 7.7$  min,  $t_{\text{major}} = 9.1$  min;  $[\alpha]_{\text{D}}^{25} = -74.0$  ( $c = 0.52$ ,  $\text{CHCl}_3$ ), m.p. 93 – 95 °C.  $^1\text{H}$  NMR (400 MHz,  $\text{CDCl}_3$ )  $\delta$  7.93 – 7.90 (m, 2H), 7.81 (d,  $J = 8.0$  Hz, 1H), 7.74 (td,  $J = 7.6, 1.6$  Hz, 1H), 7.56 – 7.47 (m, 2H), 7.46 – 7.39 (m, 2H), 7.36 – 7.32 (m, 1H), 7.31 – 7.28 (m, 2H), 7.24 – 7.21 (m, 1H), 6.99 (t,  $J = 7.2$  Hz, 1H), 6.81 (d,  $J = 8.0$  Hz, 1H), 5.09 (s, 1H), 4.71 (d,  $J = 2.8$  Hz, 1H), 1.43 (s, 9H) ppm.  $^{13}\text{C}$  NMR (100 MHz,  $\text{CDCl}_3$ )  $\delta$   $^{13}\text{C}$  NMR (101 MHz, )  $\delta$  175.3, 160.3 (d,  $J_{\text{CF}} = 250.7$  Hz), 154.4, 153.8, 137.3, 132.4 (d,  $J_{\text{CF}} = 8.5$  Hz), 131.7, 130.7, 129.6, 129.5, 129.1, 128.3, 127.6 (d,  $J_{\text{CF}} = 2.5$  Hz), 125.8, 125.3, 125.1, 125.0, 124.6 (d,  $J_{\text{CF}} = 3.9$  Hz), 124.4, 121.9, 118.5, 116.9 (d,  $J_{\text{CF}} = 20.7$  Hz), 115.5 (d,  $J_{\text{CF}} = 1.7$  Hz), 112.2, 80.8, 54.2, 47.7, 28.4 ppm.  $^{19}\text{F}$  NMR (376 MHz,  $\text{CDCl}_3$ )  $\delta$  -112.431 ppm. HR-MS (ESI)  $m/z$  calcd for  $\text{C}_{31}\text{H}_{26}\text{FNO}_5$   $[\text{M}+\text{Na}]^+$  534.16872, found 534.16898.

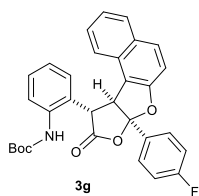

***tert*-butyl (2-((7a*R*,10*S*,10a*S*)-7a-(4-fluorophenyl)-9-oxo-7a,9,10,10a-tetrahydrofuro[2,3-*b*]naphtho[1,2-*d*]furan-10-yl)phenyl)carbamate (3g)**

The reaction was carried out following the general procedure to furnish the crude product. The title compound was isolated by column chromatography (Petroleum Ether/Ethyl Acetate = 40:1) in 84% yield as white solid. The enantiomeric excess was determined to be 91% ee by HPLC analysis on a Daicel Chiralpak IA column: 80/20 *n*-hexane/*i*-PrOH, flow rate 1.00 mL/min,  $\lambda = 215$  nm,  $t_{\text{minor}} = 12.8$  min,  $t_{\text{major}} = 15.6$  min;  $[\alpha]_{\text{D}}^{25} = -129.0$  ( $c = 0.5$ ,  $\text{CHCl}_3$ ), m.p. 88 – 89 °C.  $^1\text{H}$  NMR (400 MHz,  $\text{CDCl}_3$ )  $\delta$  7.91 (d,  $J = 8.4$  Hz, 2H), 7.80 (d,  $J = 8.0$  Hz, 1H), 7.62 – 7.58 (m, 2H), 7.49 (br s, 1H), 7.48 – 7.41 (m, 2H), 7.39 – 7.35 (m, 1H), 7.31 (d,  $J = 8.8$  Hz, 1H), 7.22 (d,  $J = 8.0$  Hz, 1H), 7.20 – 7.15 (m, 2H), 7.01 (td,  $J = 7.6$ , 0.8 Hz, 1H), 6.76 (d,  $J = 7.6$  Hz, 1H), 4.84 (d,  $J = 2.8$  Hz, 1H), 4.66 (d,  $J = 2.8$  Hz, 1H), 1.40 (s, 9H) ppm.  $^{13}\text{C}$  NMR (100 MHz,  $\text{CDCl}_3$ )  $\delta$  175.7, 163.8 (d,  $J_{\text{CF}} = 250.0$  Hz), 154.7, 153.9, 137.3, 133.9 (d,  $J_{\text{CF}} = 3.3$  Hz), 131.7, 130.7, 129.6, 129.4 (d,  $J_{\text{CF}} = 23.4$  Hz), 128.2, 127.7 (d,  $J_{\text{CF}} = 8.6$  Hz), 126.2, 125.3, 124.6, 121.9, 118.3, 117.3, 116.3, 116.1, 112.2, 80.8, 55.5, 48.4, 28.4 ppm.  $^{19}\text{F}$  NMR (376 MHz,  $\text{CDCl}_3$ )  $\delta$  -110.712 ppm. HR-MS (ESI)  $m/z$  calcd for  $\text{C}_{31}\text{H}_{26}\text{FNO}_5$   $[\text{M}+\text{Na}]^+$  534.16872, found 534.16845.

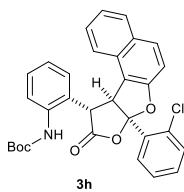

***tert*-butyl (2-((7a*R*,10*S*,10a*S*)-7a-(2-chlorophenyl)-9-oxo-7a,9,10,10a-tetrahydrofuro[2,3-*b*]naphtho[1,2-*d*]furan-10-yl)phenyl)carbamate (3h)**

The reaction was carried out following the general procedure to furnish the crude product. The title compound was isolated by column chromatography (Petroleum Ether/Ethyl Acetate = 40:1) in 64% yield as white solid. The enantiomeric excess was determined to be 91% ee by HPLC analysis on a Daicel Chiralpak IC column: 95/5 *n*-hexane/*i*-PrOH, flow rate 1.00 mL/min,  $\lambda = 254$  nm,  $t_{\text{major}} = 8.5$  min,  $t_{\text{minor}} = 9.3$  min;  $[\alpha]_{\text{D}}^{25} = -59.0$  ( $c = 0.53$ ,  $\text{CHCl}_3$ ), m.p. 97 – 98 °C.  $^1\text{H}$  NMR (400 MHz,  $\text{CDCl}_3$ )  $\delta$  7.95 – 7.92 (m, 2H), 7.83 – 7.79 (m, 2H), 7.63 (br s, 1H), 7.58 (dd,  $J = 8.0$ , 1.2 Hz, 1H), 7.51 – 7.46 (m, 2H), 7.45 – 7.41 (m, 1H), 7.40 – 7.29 (m, 4H), 6.90 (t,  $J = 8.0$  Hz, 1H), 6.58 (d,  $J = 8.0$  Hz, 1H), 5.26 (d,  $J = 1.6$  Hz, 1H), 4.77 (d,  $J = 2.0$  Hz, 1H), 1.45 (s, 9H) ppm.  $^{13}\text{C}$  NMR (100 MHz,  $\text{CDCl}_3$ )  $\delta$  175.2, 154.8, 153.8, 137.3, 134.2, 132.9, 131.8, 131.71, 131.68, 130.8, 129.6, 129.5, 129.1, 128.4, 128.3, 127.3, 125.7, 125.0, 124.4, 121.9, 118.5, 116.9, 112.4, 80.8, 53.4, 47.2, 28.4 ppm. HR-MS (ESI)  $m/z$  calcd for  $\text{C}_{31}\text{H}_{26}\text{ClNO}_5$   $[\text{M}+\text{Na}]^+$  550.13917, found 550.13946

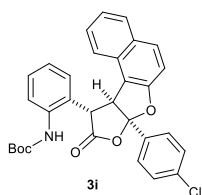

***tert*-butyl (2-((7a*R*,10*S*,10a*S*)-7a-(4-chlorophenyl)-9-oxo-7a,9,10,10a-tetrahydrofuro[2,3-*b*]naphtho[1,2-*d*]furan-10-yl)phenyl)carbamate (3i)**

The reaction was carried out following the general procedure to furnish the crude product. The title compound was isolated by column chromatography (Petroleum Ether/Ethyl Acetate = 40:1) in 76% yield as white solid. The enantiomeric excess was determined to be 93% ee by HPLC analysis on a Daicel Chiralpak AD column: 80/20 *n*-hexane/*i*-PrOH, flow rate 1.00 mL/min,  $\lambda = 215$  nm,  $t_{\text{minor}} = 8.6$  min,  $t_{\text{major}} = 9.9$  min;  $[\alpha]_{\text{D}}^{25} = -57.0$  ( $c = 0.5$ , CHCl<sub>3</sub>), m.p. 92 – 94 °C. <sup>1</sup>H NMR (400 MHz, CDCl<sub>3</sub>)  $\delta$  7.85 (d,  $J = 8.4$  Hz, 2H), 7.74 (d,  $J = 7.2$  Hz, 1H), 7.47 (dd,  $J = 6.8, 2.0$  Hz, 2H), 7.41 – 7.35 (m, 4H), 7.34 – 7.26 (m, 2H), 7.23 (d,  $J = 9.2$  Hz, 1H), 7.14 (d,  $J = 8.0$  Hz, 1H), 6.97 (t,  $J = 7.6$  Hz, 1H), 6.70 (d,  $J = 8.0$  Hz, 1H), 4.78 (d,  $J = 2.0$  Hz, 1H), 4.59 (d,  $J = 2.8$  Hz, 1H), 1.34 (s, 9H) ppm. <sup>13</sup>C NMR (100 MHz, CDCl<sub>3</sub>)  $\delta$  174.5, 153.5, 152.6, 136.0, 135.23, 135.16, 130.7, 129.5, 128.3, 128.2, 127.3, 125.9, 125.0, 124.2, 123.4, 120.7, 117.0, 116.0, 111.0, 79.7, 54.2, 47.2, 27.2 ppm. HR-MS (ESI)  $m/z$  calcd for C<sub>31</sub>H<sub>26</sub>ClNO<sub>5</sub> [M+Na]<sup>+</sup> 550.13917, found 550.13931.

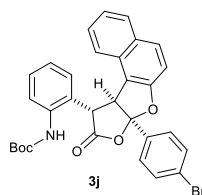

***tert*-butyl (2-((7a*R*,10*S*,10a*S*)-7a-(4-bromophenyl)-9-oxo-7a,9,10,10a-tetrahydrofuro[2,3-*b*]naphtho[1,2-*d*]furan-10-yl)phenyl)carbamate (3j)**

The reaction was carried out following the general procedure to furnish the crude product. The title compound was isolated by column chromatography (Petroleum Ether/Ethyl Acetate = 40:1) in 88% yield as white solid. The enantiomeric excess was determined to be 92% ee by HPLC analysis on a Daicel Chiralpak IA column: 95/5 *n*-hexane/*i*-PrOH, flow rate 1.00 mL/min,  $\lambda = 215$  nm,  $t_{\text{minor}} = 20.7$  min,  $t_{\text{major}} = 22.1$  min;  $[\alpha]_{\text{D}}^{25} = -33.0$  ( $c = 0.5$ , CHCl<sub>3</sub>), m.p. 90 – 92 °C. <sup>1</sup>H NMR (400 MHz, CDCl<sub>3</sub>)  $\delta$  7.92 (d,  $J = 8.8$  Hz, 2H), 7.81 (d,  $J = 7.6$  Hz, 1H), 7.62 (dd,  $J = 6.8, 2.0$  Hz, 2H), 7.49 – 7.45 (m, 3H), 7.44 – 7.35 (m, 3H), 7.31 (d,  $J = 8.8$  Hz, 1H), 7.21 (d,  $J = 8.0$  Hz, 1H), 7.05 (td,  $J = 7.6, 0.8$  Hz, 1H), 6.79 (d,  $J = 7.6$  Hz, 1H), 4.84 (d,  $J = 2.8$  Hz, 1H), 4.66 (d,  $J = 2.8$  Hz, 1H), 1.41 (s, 9H) ppm. <sup>13</sup>C NMR (100 MHz, CDCl<sub>3</sub>)  $\delta$  175.6, 154.7, 153.8, 137.2, 137.0, 132.3, 131.9, 130.7, 129.6, 129.5, 129.3, 128.5, 127.3, 126.2, 125.5, 124.6, 121.9, 118.3, 117.2, 112.2, 80.9, 55.4, 48.5, 28.3 ppm. HR-MS (ESI)  $m/z$  calcd for C<sub>31</sub>H<sub>26</sub>BrNO<sub>5</sub> [M+Na]<sup>+</sup> 594.08866, found 594.08910.



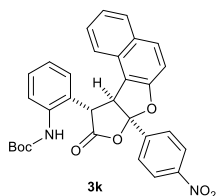

***tert*-butyl (2-((7a*R*,10*S*,10a*S*)-7a-(4-nitrophenyl)-9-oxo-7a,9,10,10a-tetrahydrofuro[2,3-*b*]naphtho[1,2-*d*]furan-10-yl)phenyl)carbamate (3k)**

The reaction was carried out following the general procedure to furnish the crude product. The title compound was isolated by column chromatography (Petroleum Ether/Ethyl Acetate = 30:1) in 91% yield as white solid. The enantiomeric excess was determined to be 94% ee by HPLC analysis on a Daicel Chiralpak IA column: 90/10 *n*-hexane/*i*-PrOH, flow rate 1.00 mL/min,  $\lambda = 215$  nm,  $t_{\text{minor}} = 20.1$  min,  $t_{\text{major}} = 23.9$  min;  $[\alpha]_{\text{D}}^{25} = -44.0$  ( $c = 0.5$ , CHCl<sub>3</sub>), m.p. 105 – 106 °C. <sup>1</sup>H NMR (400 MHz, CDCl<sub>3</sub>)  $\delta$  8.36 – 8.33 (dd,  $J = 10.8, 2.4$  Hz, 2H), 7.96 – 7.93 (m, 2H), 7.82 – 7.79 (m, 3H), 7.48 – 7.43 (m, 2H), 7.39 (t,  $J = 8.0$  Hz, 2H), 7.33 (d,  $J = 9.2$  Hz, 1H), 7.20 (d,  $J = 8.0$  Hz, 1H), 7.05 (t,  $J = 7.6$  Hz, 1H), 6.74 (d,  $J = 7.6$  Hz, 1H), 4.88 (d,  $J = 2.8$  Hz, 1H), 4.67 (d,  $J = 3.2$  Hz, 1H), 1.41 (s, 9H) ppm. <sup>13</sup>C NMR (100 MHz, CDCl<sub>3</sub>)  $\delta$  175.3, 154.6, 153.8, 149.1, 144.5, 137.2, 132.2, 130.8, 129.6, 129.53, 129.49, 128.7, 126.9, 125.6, 124.8, 124.3, 121.9, 118.0, 116.3, 112.1, 81.0, 55.6, 48.6, 28.3 ppm. HR-MS (ESI)  $m/z$  calcd for C<sub>31</sub>H<sub>26</sub>N<sub>2</sub>O<sub>7</sub> [M+Na]<sup>+</sup> 561.16322, found 561.15395.

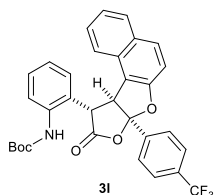

***tert*-butyl (2-((7a*R*,10*S*,10a*S*)-9-oxo-7a-(4-(trifluoromethyl)phenyl)-7a,9,10,10a-tetrahydrofuro[2,3-*b*]naphtho[1,2-*d*]furan-10-yl)phenyl)carbamate (3l)**

The reaction was carried out following the general procedure to furnish the crude product. The title compound was isolated by column chromatography (Petroleum Ether/Ethyl Acetate = 30:1) in 71% yield as white solid. The enantiomeric excess was determined to be 92% ee by HPLC analysis on a Daicel Chiralpak AD column: 80/20 *n*-hexane/*i*-PrOH, flow rate 1.00 mL/min,  $\lambda = 254$  nm,  $t_{\text{minor}} = 6.9$  min,  $t_{\text{major}} = 12.7$  min;  $[\alpha]_{\text{D}}^{25} = -125.0$  ( $c = 0.5$ , CHCl<sub>3</sub>), m.p. 140 – 141 °C. <sup>1</sup>H NMR (400 MHz, CDCl<sub>3</sub>)  $\delta$  7.86 (d,  $J = 9.2$  Hz, 2H), 7.73 (d,  $J = 8.0$  Hz, 1H), 7.67 (dd,  $J = 11.2, 8.8$  Hz, 4H), 7.40 – 7.28 (m, 4H), 7.25 (d,  $J = 8.8$  Hz, 1H), 7.13 (d,  $J = 7.6$  Hz, 1H), 6.96 (t,  $J = 7.6$  Hz, 1H), 6.68 (d,  $J = 8.0$  Hz, 1H), 4.80 (d,  $J = 2.4$  Hz, 1H), 4.59 (d,  $J = 2.8$  Hz, 1H), 1.33 (s, 9H) ppm. <sup>13</sup>C NMR (100 MHz, CDCl<sub>3</sub>)  $\delta$  175.6, 154.7, 153.8, 141.7, 137.2, 132.4 (q,  $J = 32.7$  Hz), 132.0, 130.7, 129.5, 129.4, 128.6, 126.1, 125.5, 124.7, 123.8 (q,  $J = 272.5$  Hz), 121.9, 118.1, 116.8, 112.1, 80.9, 55.5, 48.5, 28.3 ppm. <sup>19</sup>F NMR (376 MHz, CDCl<sub>3</sub>)  $\delta$  -62.669 ppm. HR-MS (ESI)  $m/z$  calcd for C<sub>32</sub>H<sub>26</sub>F<sub>3</sub>NO<sub>5</sub> [M+Na]<sup>+</sup> 584.16553, found 584.16492.

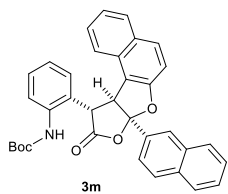

***tert*-butyl (2-((7aR,10S,10aS)-7a-(naphthalen-2-yl)-9-oxo-7a,9,10,10a-tetrahydrofuro[2,3-*b*]naphtho[1,2-*d*]furan-10-yl)phenyl)carbamate (3m)**

The reaction was carried out following the general procedure to furnish the crude product. The title compound was isolated by column chromatography (Petroleum Ether/Ethyl Acetate = 30:1) in 92% yield as white solid. The enantiomeric excess was determined to be 90% ee by HPLC analysis on a Daicel Chiralpak AD column: 80/20 *n*-hexane/*i*-PrOH, flow rate 1.00 mL/min,  $\lambda = 215$  nm,  $t_{\text{major}} = 8.7$  min,  $t_{\text{minor}} = 14.4$  min;  $[\alpha]_{\text{D}}^{25} = -89.0$  ( $c = 0.56$ , CHCl<sub>3</sub>), m.p. 100 – 102 °C. <sup>1</sup>H NMR (400 MHz, CDCl<sub>3</sub>)  $\delta$  8.14 (s, 1H), 7.99 – 7.89 (m, 5H), 7.81 (d,  $J = 8.0$  Hz, 1H), 7.64 – 7.52 (m, 4H), 7.49 – 7.41 (m, 2H), 7.36 (d,  $J = 8.8$  Hz, 1H), 7.32 (t,  $J = 7.6$  Hz, 1H), 7.26 – 7.25 (m, 2H), 6.89 (t,  $J = 7.6$  Hz, 1H), 6.78 (d,  $J = 7.6$  Hz, 1H), 5.00 (d,  $J = 2.4$  Hz, 1H), 4.73 (d,  $J = 2.4$  Hz, 1H), 1.42 (s, 9H) ppm. <sup>13</sup>C NMR (100 MHz, CDCl<sub>3</sub>)  $\delta$  175.9, 154.9, 153.9, 137.2, 134.9, 134.0, 132.9, 131.8, 130.7, 129.7, 129.5, 129.4, 129.1, 128.9, 128.4, 127.9, 127.5, 127.1, 126.3, 125.4, 125.1, 124.5, 122.6, 122.0, 118.5, 117.9, 112.3, 80.8, 55.4, 48.5, 28.3 ppm. HR-MS (ESI)  $m/z$  calcd for C<sub>35</sub>H<sub>29</sub>NO<sub>5</sub> [M+Na]<sup>+</sup> 566.19379, found 566.19430.

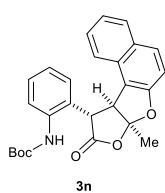

***tert*-butyl (2-((7aS,10S,10aS)-7a-methyl-9-oxo-7a,9,10,10a-tetrahydrofuro[2,3-*b*]naphtho[1,2-*d*]furan-10-yl)phenyl)carbamate (3n)**

The reaction was carried out following the general procedure to furnish the crude product. The title compound was isolated by column chromatography (Petroleum Ether/Ethyl Acetate = 30:1) in 60% yield as white solid. The enantiomeric excess was determined to be 83% ee by HPLC analysis on a Daicel Chiralpak AD column: 95/5 *n*-hexane/*i*-PrOH, flow rate 1.00 mL/min,  $\lambda = 254$  nm,  $t_{\text{minor}} = 11.1$  min,  $t_{\text{major}} = 21.3$  min;  $[\alpha]_{\text{D}}^{25} = -118.0$  ( $c = 0.5$ , CHCl<sub>3</sub>), m.p. 150 – 152 °C. <sup>1</sup>H NMR (400 MHz, CDCl<sub>3</sub>)  $\delta$  7.88 – 7.81 (m, 3H), 7.47 – 7.35 (m, 5H), 7.29 (d,  $J = 7.6$  Hz, 1H), 7.20 (d,  $J = 8.8$  Hz, 2H), 4.64 (d,  $J = 3.6$  Hz, 1H), 4.46 (d,  $J = 3.6$  Hz, 1H), 2.12 (s, 3H), 1.43 (s, 9H) ppm. <sup>13</sup>C NMR (100 MHz, CDCl<sub>3</sub>)  $\delta$  175.6, 154.4, 154.0, 137.2, 131.4, 130.4, 129.7, 129.38, 129.36, 128.2, 126.6, 125.6, 124.3, 122.1, 119.0, 117.9, 112.2, 80.9, 52.2, 49.6, 28.4, 24.8 ppm. HR-MS (ESI)  $m/z$  calcd for C<sub>26</sub>H<sub>25</sub>NO<sub>5</sub> [M+Na]<sup>+</sup> 454.16249, found 454.16281.

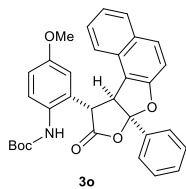

***tert*-butyl (4-methoxy-2-((7a*R*,10*S*,10a*S*)-9-oxo-7a-phenyl-7a,9,10,10a-tetrahydrofuro[2,3-*b*]naphtho[1,2-*d*]furan-10-yl)phenyl)carbamate (3o)**

The reaction was carried out following the general procedure to furnish the crude product.

The title compound was isolated by column chromatography (Petroleum Ether/Ethyl

Acetate = 20:1) in 90% yield as white solid. The enantiomeric excess was determined to be 90% ee by HPLC analysis on a Daicel Chiralpak AD column: 80/20 *n*-hexane/*i*-PrOH, flow rate 1.00 mL/min,  $\lambda$  = 215 nm,  $t_{\text{major}}$  = 9.1 min,  $t_{\text{minor}}$  = 11.7 min;  $[\alpha]_{\text{D}}^{25}$  = -172.0 ( $c$  = 0.5, CHCl<sub>3</sub>), m.p. 103 – 105 °C. <sup>1</sup>H NMR (400 MHz, CDCl<sub>3</sub>)  $\delta$  7.93 – 7.90 (m, 2H), 7.67 – 7.65 (m, 2H), 7.58 (d,  $J$  = 7.2 Hz, 1H), 7.52 – 7.49 (m, 3H), 7.46 (d,  $J$  = 7.2 Hz, 1H), 7.41 (t,  $J$  = 7.2 Hz, 1H), 7.32 – 7.30 (m, 2H), 7.09 (br s, 1H), 6.87 (dd,  $J$  = 8.8, 2.8 Hz, 1H), 6.25 (d,  $J$  = 2.4 Hz, 1H), 4.85 (d,  $J$  = 1.6 Hz, 1H), 4.69 (d,  $J$  = 2.4 Hz, 1H), 3.33 (s, 3H), 1.39 (s, 9H) ppm. <sup>13</sup>C NMR (100 MHz, CDCl<sub>3</sub>)  $\delta$  175.4, 157.5, 154.8, 154.4, 138.1, 131.8, 130.7, 130.2, 129.7, 129.6, 129.5, 129.2, 128.7, 128.4, 125.7, 124.5, 122.0, 118.3, 117.5, 115.6, 112.2, 110.9, 80.5, 56.0, 55.1, 48.5, 28.4 ppm. HR-MS (ESI)  $m/z$  calcd for C<sub>32</sub>H<sub>29</sub>NO<sub>6</sub> [M+Na]<sup>+</sup> 546.18871, found 546.18895.

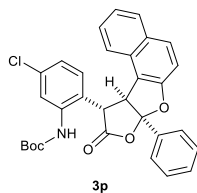

***tert*-butyl (5-chloro-2-((7a*R*,10*S*,10a*S*)-9-oxo-7a-phenyl-7a,9,10,10a-tetrahydrofuro[2,3-*b*]naphtho[1,2-*d*]furan-10-yl)phenyl)carbamate (3p)**

The reaction was carried out following the general procedure to furnish the crude product. The title compound was isolated by column chromatography (Petroleum

Ether/Ethyl Acetate = 40:1) in 84% yield as white solid. The enantiomeric excess was determined to be 93% ee by HPLC analysis on a Daicel Chiralpak AD column: 80/20 *n*-hexane/*i*-PrOH, flow rate 1.00 mL/min,  $\lambda$  = 254 nm,  $t_{\text{minor}}$  = 5.1 min,  $t_{\text{major}}$  = 5.5 min;  $[\alpha]_{\text{D}}^{25}$  = -86.0 ( $c$  = 0.5, CHCl<sub>3</sub>), m.p. 113 – 114 °C. <sup>1</sup>H NMR (400 MHz, CDCl<sub>3</sub>)  $\delta$  7.94 – 7.92 (m, 3H), 7.73 (br s, 1H), 7.60 – 7.58 (m, 2H), 7.53 – 7.49 (m, 3H), 7.48 – 7.41 (m, 2H), 7.33 (d,  $J$  = 9.2 Hz, 1H), 7.21 (d,  $J$  = 8.0 Hz, 1H), 6.95 (dd,  $J$  = 8.8, 2.4 Hz, 1H), 6.67 (d,  $J$  = 8.8 Hz, 1H), 4.86 (d,  $J$  = 2.4 Hz, 1H), 4.61 (d,  $J$  = 2.8 Hz, 1H), 1.44 (s, 9H) ppm. <sup>13</sup>C NMR (100 MHz, CDCl<sub>3</sub>)  $\delta$  175.5, 154.9, 153.4, 138.6, 137.6, 134.9, 131.9, 130.7, 130.3, 129.6, 129.5, 129.2, 128.5, 127.2, 125.5, 125.3, 124.9, 124.6, 121.7, 118.0, 117.8, 112.3, 81.3, 55.4, 48.0, 28.3 ppm. HR-MS (ESI)  $m/z$  calcd for C<sub>31</sub>H<sub>26</sub>ClNO<sub>5</sub> [M+Na]<sup>+</sup> 550.13917, found 550.13945.

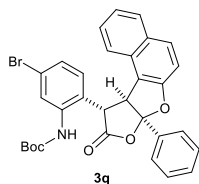

**tert-butyl (5-bromo-2-((7aR,10S,10aS)-9-oxo-7a-phenyl-7a,9,10,10a-tetrahydrofuro[2,3-b]naphtho[1,2-d]furan-10-yl)phenyl)carbamate (3q)**

*1 mmol scale reaction:* The reaction was carried out with 3-ylideneoxidole **1q** (1 mmol, 427mg), 2-naphthol **2q** (1.5 mmol, 216mg) and catalyst **F** (32 mg, 5 mol %) in toluene (4 mL) at 0 °C for 48 h following the general procedure to furnish the crude product. The title compound was isolated by column chromatography (Petroleum Ether/Ethyl Acetate = 40:1) in 89% yield as white solid. The enantiomeric excess was determined to be 94% ee by HPLC analysis on a Daicel Chiralpak AD column: 80/20 *n*-hexane/*i*-PrOH, flow rate 1.00 mL/min,  $\lambda = 254$  nm,  $t_{\text{minor}} = 5.3$  min,  $t_{\text{major}} = 5.8$  min;  $[\alpha]_{\text{D}}^{25} = -67.0$  ( $c = 0.5$ , CHCl<sub>3</sub>), m.p. 120 – 122 °C. <sup>1</sup>H NMR (400 MHz, CDCl<sub>3</sub>)  $\delta$  8.09 (s, 1H), 7.94 – 7.92 (m, 2H), 7.72 (br s, 1H), 7.60 – 7.58 (m, 2H), 7.52 – 7.46 (m, 4H), 7.45 – 7.41 (m, 1H), 7.33 (d,  $J = 9.2$  Hz, 1H), 7.20 (d,  $J = 8.0$  Hz, 1H), 7.10 (dd,  $J = 8.4, 2.0$  Hz, 1H), 6.61 (d,  $J = 8.8$  Hz, 1H), 4.85 (d,  $J = 2.0$  Hz, 1H), 4.60 (d,  $J = 2.4$  Hz, 1H), 1.44 (s, 9H) ppm. <sup>13</sup>C NMR (100 MHz, CDCl<sub>3</sub>)  $\delta$  175.5, 154.8, 153.3, 138.7, 137.4, 131.9, 130.7, 130.3, 129.6, 129.5, 129.2, 128.5, 128.0, 127.8, 127.4, 125.4, 124.6, 122.8, 121.7, 117.9, 117.8, 112.3, 81.3, 55.2, 48.0, 28.3 ppm. HR-MS (ESI)  $m/z$  calcd for C<sub>31</sub>H<sub>26</sub>BrNO<sub>5</sub> [M+Na]<sup>+</sup> 594.08866, found 594.08910.

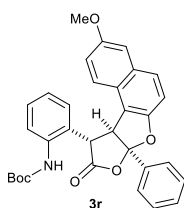

**tert-butyl (2-((7aR,10S,10aS)-3-methoxy-9-oxo-7a-phenyl-7a,9,10,10a-tetrahydrofuro[2,3-b]naphtho[1,2-d]furan-10-yl)phenyl)carbamate (3r)**

The reaction was carried out following the general procedure, but running the reaction over 72 hours, to furnish the crude product. The title compound was isolated by column chromatography (Petroleum Ether/Ethyl Acetate = 20:1) in 62% yield as white solid. The enantiomeric excess was determined to be 90% ee by HPLC analysis on a Daicel Chiralpak AD column: 95/5 *n*-hexane/*i*-PrOH, flow rate 1.00 mL/min,  $\lambda = 215$  nm,  $t_{\text{minor}} = 31.3$  min,  $t_{\text{major}} = 35.0$  min;  $[\alpha]_{\text{D}}^{25} = -156.0$  ( $c = 0.5$ , CHCl<sub>3</sub>), m.p. 95 – 96 °C. <sup>1</sup>H NMR (400 MHz, CDCl<sub>3</sub>)  $\delta$  7.80 (d,  $J = 9.2$  Hz, 2H), 7.61 – 7.59 (m, 2H), 7.53 (br s, 1H), 7.51 – 7.48 (m, 3H), 7.36 – 7.32 (m, 1H), 7.28 (d,  $J = 8.8$  Hz, 1H), 7.24 (t,  $J = 1.2$  Hz, 1H), 7.14 (d,  $J = 1.2$  Hz, 2H), 6.98 (t,  $J = 7.2$  Hz, 1H), 6.76 (d,  $J = 7.6$  Hz, 1H), 4.85 (d,  $J = 2.8$  Hz, 1H), 4.64 (d,  $J = 2.8$  Hz, 1H), 3.91 (s, 3H), 1.43 (s, 9H) ppm. <sup>13</sup>C NMR (100 MHz, CDCl<sub>3</sub>)  $\delta$  175.9, 156.7, 153.9, 153.3, 137.9, 137.3, 131.8, 130.2, 130.1, 129.2, 129.1, 126.4, 125.6, 125.2, 124.9, 123.3, 112.6,

107.9, 80.8, 55.6, 55.5, 48.6, 28.4 ppm. HR-MS (ESI)  $m/z$  calcd for  $C_{32}H_{29}NO_6$   $[M+Na]^+$  546.18871, found 546.18859.

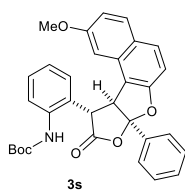

***tert*-butyl (2-((7aR,10S,10aS)-2-methoxy-9-oxo-7a-phenyl-7a,9,10,10a-tetrahydrofuro[2,3-*b*]naphtho[1,2-*d*]furan-10-yl)phenyl)carbamate (3s)**

The reaction was carried out following the general procedure to furnish the crude product.

The title compound was isolated by column chromatography (Petroleum Ether/Ethyl Acetate = 20:1) in 67% yield as white solid. The enantiomeric excess was determined to be 95% ee by HPLC analysis on a Daicel Chiralpak IA column: 95/5 *n*-hexane/*i*-PrOH, flow rate 1.00 mL/min,  $\lambda$  = 215 nm,  $t_{\text{minor}}$  = 12.0 min,  $t_{\text{major}}$  = 15.8 min;  $[\alpha]_D^{25}$  = -237.0 ( $c$  = 0.5,  $CHCl_3$ ), m.p. 85 – 87 °C.  $^1H$  NMR (400 MHz,  $CDCl_3$ )  $\delta$  7.81 (d,  $J$  = 8.8 Hz, 1H), 7.78 (d,  $J$  = 9.2 Hz, 1H), 7.73 (d,  $J$  = 8.0 Hz, 1H), 7.63 – 7.61 (m, 2H), 7.51 – 7.48 (m, 3H), 7.34 (td,  $J$  = 8.0, 1.2 Hz, 1H), 7.24 (br s, 1H), 7.16 (d,  $J$  = 8.8 Hz, 1H), 7.05 (d,  $J$  = 7.6 Hz, 1H), 7.01 (dd,  $J$  = 8.8, 2.4 Hz, 1H), 6.87 (d,  $J$  = 7.6 Hz, 1H), 6.33 (d,  $J$  = 2.4 Hz, 1H), 4.80 (d,  $J$  = 3.2 Hz, 1H), 4.64 (d,  $J$  = 3.6 Hz, 1H), 3.54 (s, 3H), 1.39 (s, 9H) ppm.  $^{13}C$  NMR (100 MHz,  $CDCl_3$ )  $\delta$  175.7, 159.6, 155.6, 153.8, 138.1, 137.1, 131.2, 131.0, 130.2, 129.11, 129.10, 126.9, 126.6, 125.9, 125.5, 125.4, 117.9, 117.6, 117.5, 109.4, 99.8, 80.9, 55.5, 55.2, 48.4, 28.3 ppm. HR-MS (ESI)  $m/z$  calcd for  $C_{32}H_{29}NO_6$   $[M+Na]^+$  546.18871, found 546.18866.

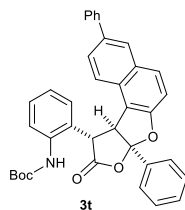

***tert*-butyl (2-((7aR,10S,10aS)-9-oxo-3,7a-diphenyl-7a,9,10,10a-tetrahydrofuro[2,3-*b*]naphtho[1,2-*d*]furan-10-yl)phenyl)carbamate (3t)**

The reaction was carried out following the general procedure to furnish the crude product.

The title compound was isolated by column chromatography (Petroleum Ether/Ethyl Acetate = 40:1) in 67% yield as white solid. The enantiomeric excess was determined to be 91% ee by HPLC analysis on a Daicel Chiralpak AD column: 80/20 *n*-hexane/*i*-PrOH, flow rate 1.00 mL/min,  $\lambda$  = 254 nm,  $t_{\text{minor}}$  = 8.5 min,  $t_{\text{major}}$  = 9.4 min;  $[\alpha]_D^{25}$  = -198.0 ( $c$  = 0.5,  $CHCl_3$ ), m.p. 120 – 122 °C.  $^1H$  NMR (400 MHz,  $CDCl_3$ )  $\delta$  8.13 (d,  $J$  = 1.6 Hz, 1H), 7.98 (d,  $J$  = 8.8 Hz, 1H), 7.83 (d,  $J$  = 8.0 Hz, 1H), 7.73 (dd,  $J$  = 8.4, 1.6 Hz, 1H), 7.68 – 7.66 (m, 2H), 7.64 – 7.61 (m, 2H), 7.57 (br s, 1H), 7.52 – 7.50 (m, 3H), 7.49 – 7.46 (m, 2H), 7.40 – 7.34 (m, 3H), 7.31 (d,  $J$  = 8.8 Hz, 1H), 7.01 (t,  $J$  = 7.6 Hz, 1H), 6.80 (d,  $J$  = 7.6 Hz, 1H), 4.92 (d,  $J$  = 2.4 Hz, 1H), 4.71 (d,  $J$  = 2.8 Hz, 1H), 1.42 (s, 9H) ppm.  $^{13}C$  NMR (100 MHz,  $CDCl_3$ )  $\delta$  175.8, 155.0, 153.9, 140.7, 137.7, 137.3, 137.2, 132.1, 131.0, 130.2, 129.2, 129.1, 128.7, 128.1, 127.6,

127.3, 126.3, 125.5, 125.3, 122.5, 118.4, 117.8, 112.7, 80.8, 55.4, 48.5, 28.3 ppm. HR-MS (ESI)  $m/z$  calcd for  $C_{37}H_{31}NO_5$   $[M+Na]^+$  592.20944, found 592.20903.

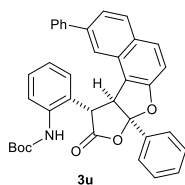

***tert*-butyl (2-((7aR,10S,10aS)-9-oxo-2,7a-diphenyl-7a,9,10,10a-tetrahydrofuro[2,3-b]naphtho[1,2-d]furan-10-yl)phenyl)carbamate (3u)**

The reaction was carried out following the general procedure to furnish the crude product.

The title compound was isolated by column chromatography (Petroleum Ether/Ethyl Acetate = 40:1) in 76% yield as white solid. The enantiomeric excess was determined to be 95% ee by HPLC analysis on a Daicel Chiralpak AD column: 80/20 *n*-hexane/*i*-PrOH, flow rate 1.00 mL/min,  $\lambda = 254$  nm,  $t_{\text{major}} = 12.0$  min,  $t_{\text{minor}} = 23.7$  min;  $[\alpha]_D^{25} = -368.0$  ( $c = 0.57$ ,  $CHCl_3$ ), m.p. 112 – 114 °C.  $^1H$  NMR (400 MHz,  $CDCl_3$ )  $\delta$  8.00 (d,  $J = 8.4$  Hz, 1H), 7.94 (d,  $J = 8.8$  Hz, 1H), 7.84 (d,  $J = 5.2$  Hz, 1H), 7.68 (dd,  $J = 8.8, 2.0$  Hz, 1H), 7.64 – 7.62 (m, 2H), 7.52 – 7.49 (m, 3H), 7.45 – 7.31 (m, 9H), 7.32 – 7.30 (m, 1H), 6.98 (t,  $J = 7.6$  Hz, 1H), 6.80 (d,  $J = 7.6$  Hz, 1H), 4.90 (d,  $J = 2.8$  Hz, 1H), 4.80 (s, 1H), 1.37 (s, 9H) ppm.  $^{13}C$  NMR (100 MHz,  $CDCl_3$ )  $\delta$  175.7, 155.3, 153.6, 141.2, 140.4, 137.8, 137.2, 131.4, 130.2, 130.0, 129.7, 129.2, 129.1, 127.9, 127.6, 126.5, 125.5, 125.2, 124.3, 119.8, 118.8, 117.8, 112.2, 80.8, 55.4, 48.7, 28.3 ppm. HR-MS (ESI)  $m/z$  calcd for  $C_{37}H_{31}NO_5$   $[M+Na]^+$  592.20944, found 592.20890.

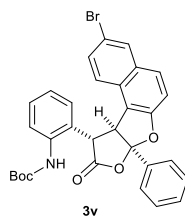

***tert*-butyl (2-((7aR,10S,10aS)-3-bromo-9-oxo-7a-phenyl-7a,9,10,10a-tetrahydrofuro[2,3-b]naphtho[1,2-d]furan-10-yl)phenyl)carbamate (3v)**

The reaction was carried out following the general procedure to furnish the crude product.

The title compound was isolated by column chromatography (Petroleum Ether/Ethyl Acetate = 30:1) in 61% yield as white solid. The enantiomeric excess was determined to be 92% ee by HPLC analysis on a Daicel Chiralpak AD column: 80/20 *n*-hexane/*i*-PrOH, flow rate 1.00 mL/min,  $\lambda = 254$  nm,  $t_{\text{minor}} = 6.5$  min,  $t_{\text{major}} = 10.4$  min;  $[\alpha]_D^{25} = -149.0$  ( $c = 0.5$ ,  $CHCl_3$ ), m.p. 88 – 90 °C.  $^1H$  NMR (400 MHz,  $CDCl_3$ )  $\delta$  8.01 (d,  $J = 2.0$  Hz, 1H), 7.75 (d,  $J = 9.2$  Hz, 1H), 7.71 (d,  $J = 7.6$  Hz, 1H), 7.54 – 7.51 (m, 2H), 7.46 – 7.41 (m, 4H), 7.31 – 7.28 (m, 1H), 7.28 – 7.25 (m, 1H), 7.02 (d,  $J = 9.2$  Hz, 1H), 6.94 (t,  $J = 7.6$  Hz, 1H), 6.69 (d,  $J = 8.0$  Hz, 1H), 4.77 (d,  $J = 2.8$  Hz, 1H), 4.53 (d,  $J = 2.8$  Hz, 1H), 1.35 (s, 9H) ppm.  $^{13}C$  NMR (100 MHz,  $CDCl_3$ )  $\delta$  174.4, 154.0, 152.7, 136.4, 135.9, 130.6, 130.5, 130.3,

129.7, 129.1, 128.1, 128.0, 126.9, 125.2, 124.4, 124.3, 122.5, 117.7, 117.0, 116.5, 112.2, 79.8, 54.3, 47.3, 27.2 ppm. HR-MS (ESI)  $m/z$  calcd for  $C_{31}H_{26}BrNO_5$   $[M+Na]^+$  594.08866, found 594.07169.

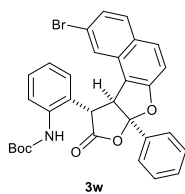

***tert*-butyl (2-((7a*R*,10*S*,10a*S*)-2-bromo-9-oxo-7a-phenyl-7a,9,10,10a-tetrahydrofuro[2,3-*b*]naphtho[1,2-*d*]furan-10-yl)phenyl)carbamate (3w)**

The reaction was carried out following the general procedure to furnish the crude product.

The title compound was isolated by column chromatography (Petroleum Ether/Ethyl Acetate = 30:1) in 60% yield as white solid. The enantiomeric excess was determined to be 96% ee by HPLC analysis on a Daicel Chiralpak AD column: 85/15 *n*-hexane/*i*-PrOH, flow rate 1.00 mL/min,  $\lambda$  = 215 nm,  $t_{\text{minor}}$  = 13.3 min,  $t_{\text{major}}$  = 19.6 min;  $[\alpha]_D^{25}$  = -186.0 ( $c$  = 0.5,  $CHCl_3$ ), m.p. 82 – 83 °C.  $^1H$  NMR (400 MHz,  $CDCl_3$ )  $\delta$  7.87 (d,  $J$  = 9.2 Hz, 1H), 7.78 – 7.75 (m, 2H), 7.60 – 7.58 (m, 2H), 7.51 – 7.47 (m, 2H), 7.38 – 7.34 (m, 2H), 7.32 (d,  $J$  = 8.8 Hz, 1H), 7.02 (t,  $J$  = 7.6 Hz, 1H), 6.77 (d,  $J$  = 7.6 Hz, 1H), 4.80 (d,  $J$  = 3.2 Hz, 1H), 4.57 (d,  $J$  = 3.2 Hz, 1H), 1.42 (s, 9H) ppm.  $^{13}C$  NMR (100 MHz,  $CDCl_3$ )  $\delta$  175.4, 155.8, 153.7, 137.6, 137.1, 131.8, 131.1, 130.9, 130.3, 129.4, 129.1, 129.0, 128.0, 126.9, 125.5, 125.4, 124.3, 122.8, 118.0, 117.7, 112.7, 80.9, 55.4, 48.9, 28.3 ppm. HR-MS (ESI)  $m/z$  calcd for  $C_{31}H_{26}BrNO_5$   $[M+Na]^+$  594.08866, found 594.08910.

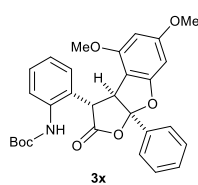

***tert*-butyl (2-((3*S*,3a*S*,8a*R*)-4,6-dimethoxy-2-oxo-8a-phenyl-2,3,3a,8a-tetrahydrofuro[2,3-*b*]benzofuran-3-yl)phenyl)carbamate (3x)**

The reaction was carried out following the general procedure to furnish the crude product. The title compound was isolated by column chromatography (Petroleum

Ether/Ethyl Acetate = 20:1) in 85% yield as white solid. The enantiomeric excess was determined to be 96% ee by HPLC analysis on a Daicel Chiralpak IC column: 90/10 *n*-hexane/*i*-PrOH, flow rate 1.00 mL/min,  $\lambda$  = 215 nm,  $t_{\text{minor}}$  = 14.8 min,  $t_{\text{major}}$  = 16.6 min;  $[\alpha]_D^{25}$  = +39.0 ( $c$  = 0.5,  $CHCl_3$ ), m.p. 92 – 94 °C.  $^1H$  NMR (400 MHz,  $CDCl_3$ )  $\delta$  7.84 (d,  $J$  = 8.0 Hz, 1H), 7.71 (s, 1H), 7.53 – 7.50 (m, 2H), 7.42 – 7.38 (m, 3H), 7.25 – 7.21 (m, 1H), 6.87 – 6.83 (m, 1H), 6.71 (dd,  $J$  = 8.0, 1.2 Hz, 1H), 6.23 (dd,  $J$  = 5.6, 2.0 Hz, 2H), 4.50 (d,  $J$  = 2.0 Hz, 1H), 4.30 (d,  $J$  = 1.6 Hz, 1H), 3.92 (s, 3H), 3.82 (s, 3H), 1.54 (s, 9H) ppm.  $^{13}C$  NMR (100 MHz,  $CDCl_3$ )  $\delta$  175.5, 163.4, 159.0, 156.5, 153.5, 137.4, 136.7, 130.0, 128.8, 128.6, 127.0,

126.8, 125.6, 124.2, 124.0, 118.0, 105.5, 93.4, 89.3, 80.9, 56.2, 55.9, 54.3, 48.2, 28.5 ppm. HR-MS (ESI)  $m/z$  calcd for  $C_{29}H_{29}NO_7$   $[M+Na]^+$  526.18362, found 526.18307.

### 3. Synthesis of 5

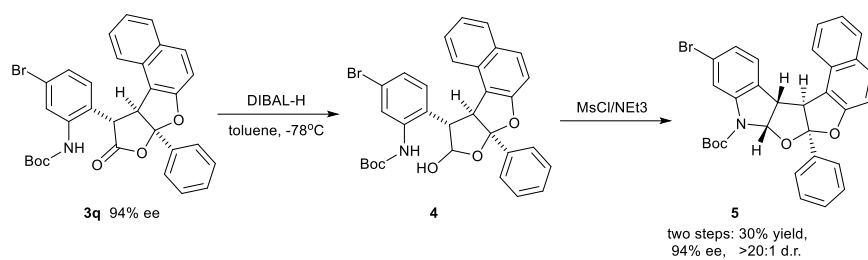

To solution of **3q** (114.2 mg, 0.2 mmol) in toluene (4 mL) was added DIBAL-H (1.0 mol/L in hexanes) at  $-78\text{ }^{\circ}\text{C}$  and stirred until completed disappearance of the starting material (monitored by TLC, 8 h). Then the reaction was quenched by saturated ammonium chloride. The mixture was extracted with ethyl acetate and the organic phase was washed with saturated ammonium chloride, dried over  $\text{Na}_2\text{SO}_4$ , filtered and evaporated. The crude product was dissolved in a  $\text{CH}_2\text{Cl}_2$  (2 ml) solution of  $\text{Et}_3\text{N}$  (30.3 mg, 0.3 mmol) and DMAP (2.5 mg, 0.02 mmol). Then methanesulfonyl chloride (23 mg, 0.2 mmol) was added dropwise at  $0\text{ }^{\circ}\text{C}$ . The reaction mixture was stirred at rt until complete disappearance of the starting materials (monitored by TLC, 14 h). Then saturated ammonium chloride was added to quench the reaction. The mixture was extracted with EA and washed with saturated sodium chloride, the organic phase was dried over  $\text{Na}_2\text{SO}_4$ . After evaporation of the volatile, the residue was purified by silica gel column chromatography (Petroleum Ether/ $\text{EtOAc}$  =20:1) to obtained the product **5** in 30% yield as a white solid. The enantiomeric excess was determined to be 94% *ee* by HPLC analysis on a Daicel Chiralpak AD column: 80/20 *n*-hexane/*i*-PrOH, flow rate 1.00 mL/min,  $\lambda = 254\text{ nm}$ ,  $t_{\text{major}} = 4.1\text{ min}$ ,  $t_{\text{minor}} = 5.4\text{ min}$ ;  $[\alpha]_{\text{D}}^{25} = +304.0$  ( $c = 0.5$ ,  $\text{CHCl}_3$ ), m.p.  $148 - 150\text{ }^{\circ}\text{C}$ .  $^1\text{H NMR}$  (400 MHz,  $\text{CDCl}_3$ )  $\delta$  8.20 (br s, 1H), 7.91 (d,  $J = 8.0\text{ Hz}$ , 1H), 7.86 (d,  $J = 8.8\text{ Hz}$ , 1H), 7.76 (d,  $J = 8.4\text{ Hz}$ , 1H), 7.58 (t,  $J = 7.2\text{ Hz}$ , 1H), 7.43 – 7.39 (m, 1H), 7.33 (dd,  $J = 12.4, 8.4\text{ Hz}$ , 2H), 7.26 – 7.25 (m, 1H), 7.24 – 7.22 (m, 5H), 6.35 (s, 1H), 4.51 (s, 1H), 4.21 (d,  $J = 5.2\text{ Hz}$ , 1H), 1.59 (s, 9H) ppm.  $^{13}\text{C NMR}$  (100 MHz,  $\text{CDCl}_3$ )  $\delta$  155.9, 151.6, 139.8, 131.0, 130.0, 129.6, 128.9, 128.5, 127.7, 126.6, 125.5, 125.2, 123.7, 122.7, 121.3, 120.4, 119.1, 117.9, 112.4,



95.3, 58.9, 51.7, 28.4 ppm. HR-MS (ESI)  $m/z$  calcd for  $C_{31}H_{26}BrNO_4$   $[M+Na]^+$  578.09374, found 578.09340.

#### 4. References

- [1] L.-L. Zhang, J.-W. Zhang, S.-H. Xiang, Z. Guo and B. Tan, *Org. Lett.*, 2018, **20**, 6022.
- [2] Y.-H. Chen, D.-J. Cheng, J. Zhang, Y. Wang, X.-Y. Liu and B. Tan, *J. Am. Chem. Soc.*, 2015, **137**, 15062.

## 5. Crystal Data of 3j

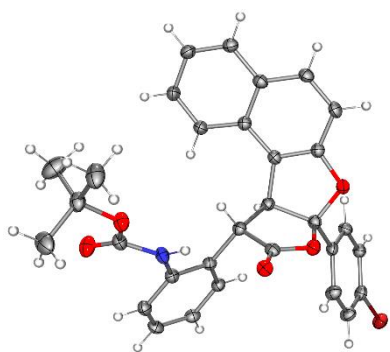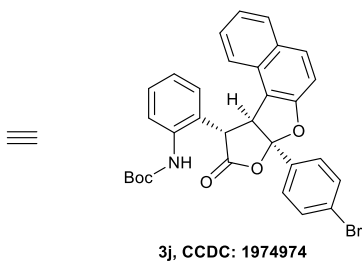

|                                  |                                                                                                                          |
|----------------------------------|--------------------------------------------------------------------------------------------------------------------------|
| Identification code              | <b>3j</b>                                                                                                                |
| Empirical formula                | C <sub>31</sub> H <sub>26</sub> BrNO <sub>5</sub>                                                                        |
| Formula weight                   | 1231.04                                                                                                                  |
| Temperature                      | 150.0 K                                                                                                                  |
| Wavelength                       | 1.54178 Å                                                                                                                |
| Crystal system                   | Triclinic                                                                                                                |
| Space group                      | P1                                                                                                                       |
| Unit cell dimensions             | a = 10.1246(4) Å      α = 92.396(2) °<br>b = 10.7766(4) Å      β = 96.373(2) °<br>c = 14.6208(5) Å      γ = 104.996(2) ° |
| Volume                           | 1527.27(10) Å <sup>3</sup>                                                                                               |
| Z                                | 1                                                                                                                        |
| Density (calculated)             | 1.338 Mg/m <sup>3</sup>                                                                                                  |
| Absorption coefficient           | 2.170 mm <sup>-1</sup>                                                                                                   |
| F(000)                           | 638                                                                                                                      |
| Crystal size                     | 0.12 × 0.11 × 0.11 mm <sup>3</sup>                                                                                       |
| Theta range for data collection  | 4.259 to 72.115 °                                                                                                        |
| Index ranges                     | -12 ≤ h ≤ 12, -13 ≤ k ≤ 13, -17 ≤ l ≤ 9                                                                                  |
| Reflections collected            | 19940                                                                                                                    |
| Independent reflections          | 7654 [R(int) = 0.0327]                                                                                                   |
| Completeness to theta = 67.679 ° | 98.3 %                                                                                                                   |
| Absorption correction            | Semi-empirical from equivalents                                                                                          |
| Max. and min. transmission       | 0.0872 and 0.0108                                                                                                        |
| Refinement method                | Full-matrix least-squares on F <sup>2</sup>                                                                              |
| Data / restraints / parameters   | 7654 / 3 / 747                                                                                                           |

|                                      |                                       |
|--------------------------------------|---------------------------------------|
| Goodness-of-fit on $F^2$             | 1.125                                 |
| Final R indices [ $I > 2\sigma(I)$ ] | $R_1 = 0.0565$ , $wR_2 = 0.1440$      |
| R indices (all data)                 | $R_1 = 0.0584$ , $wR_2 = 0.1474$      |
| Absolute structure parameter         | 0.040(13)                             |
| Extinction coefficient               | n/a                                   |
| Largest diff. peak and hole          | 0.707 and -0.336 e. $\text{\AA}^{-3}$ |

## 6. $^1\text{H}$ NMR, $^{13}\text{C}$ NMR, $^{19}\text{F}$ NMR Spectra

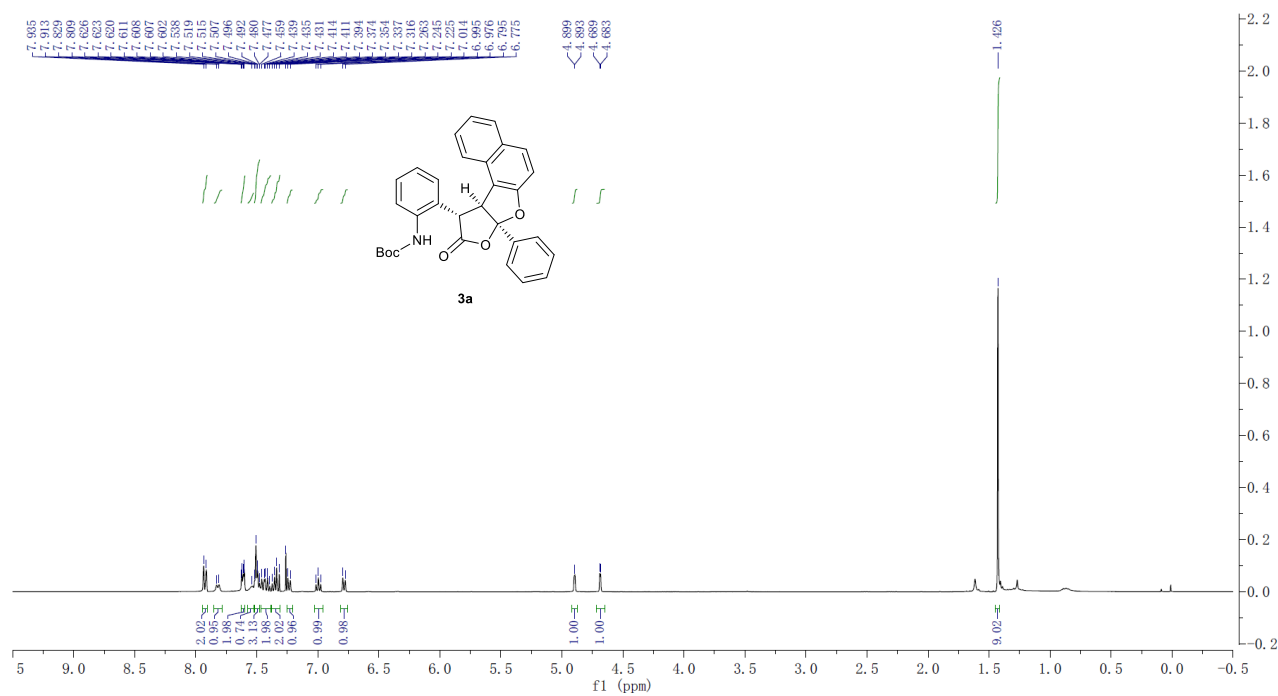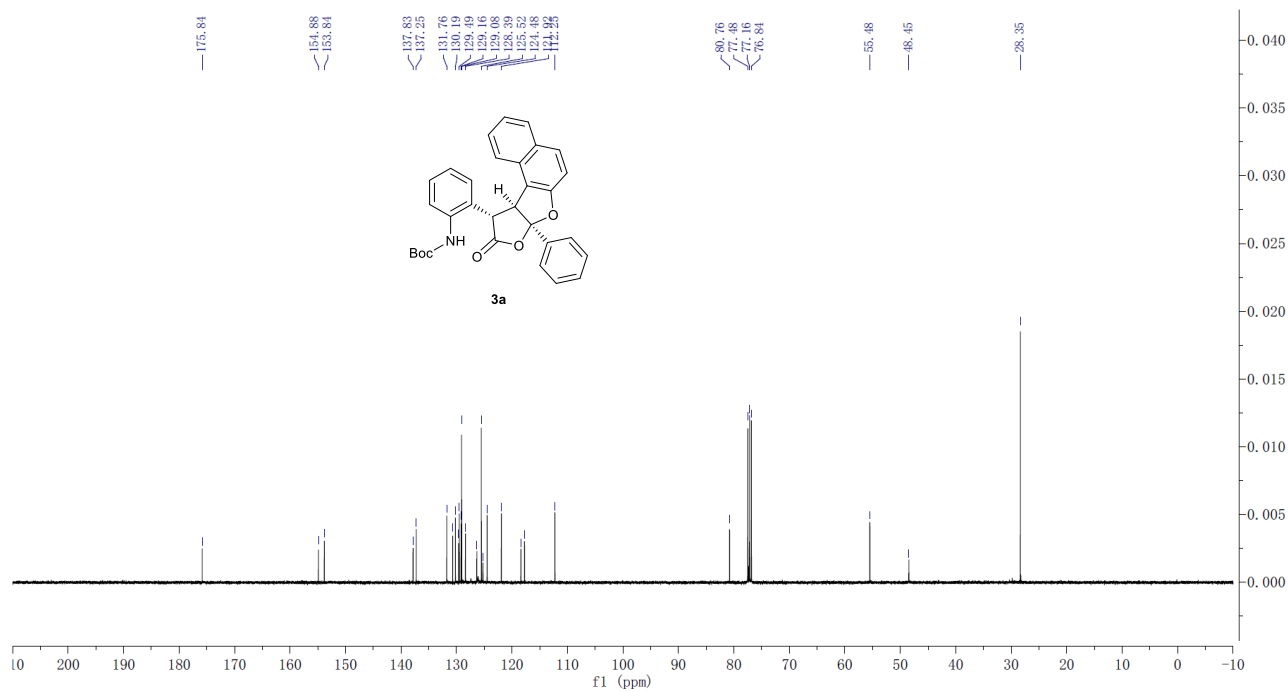

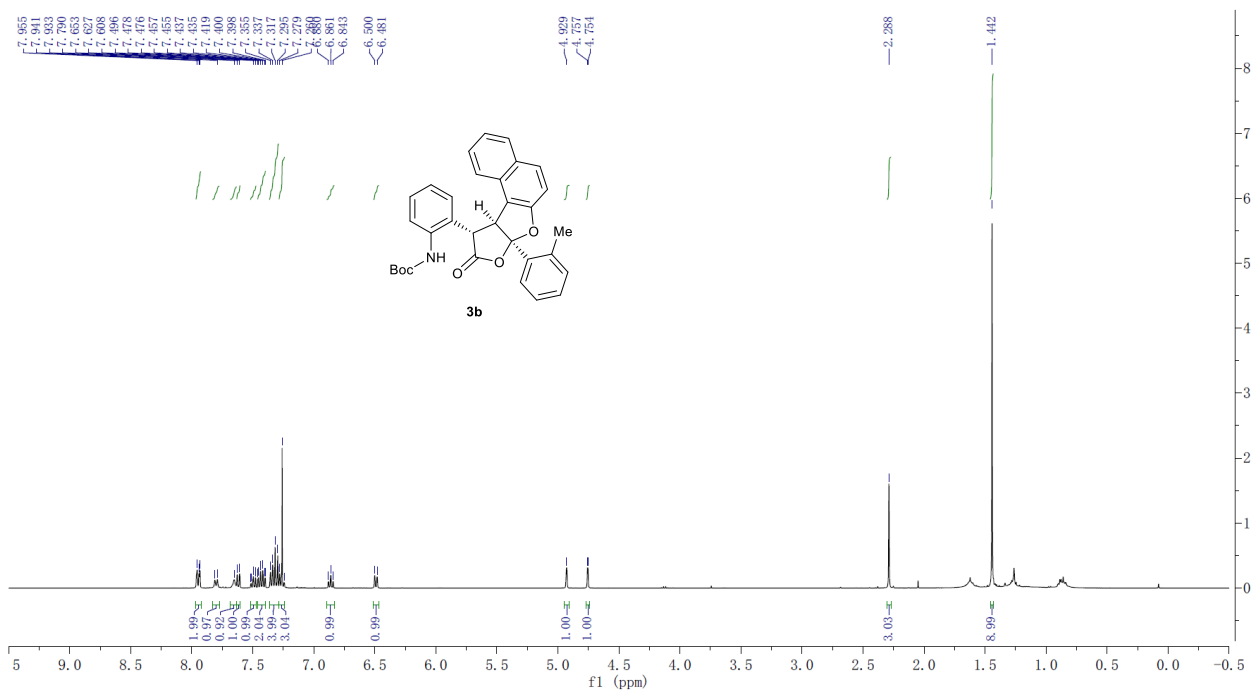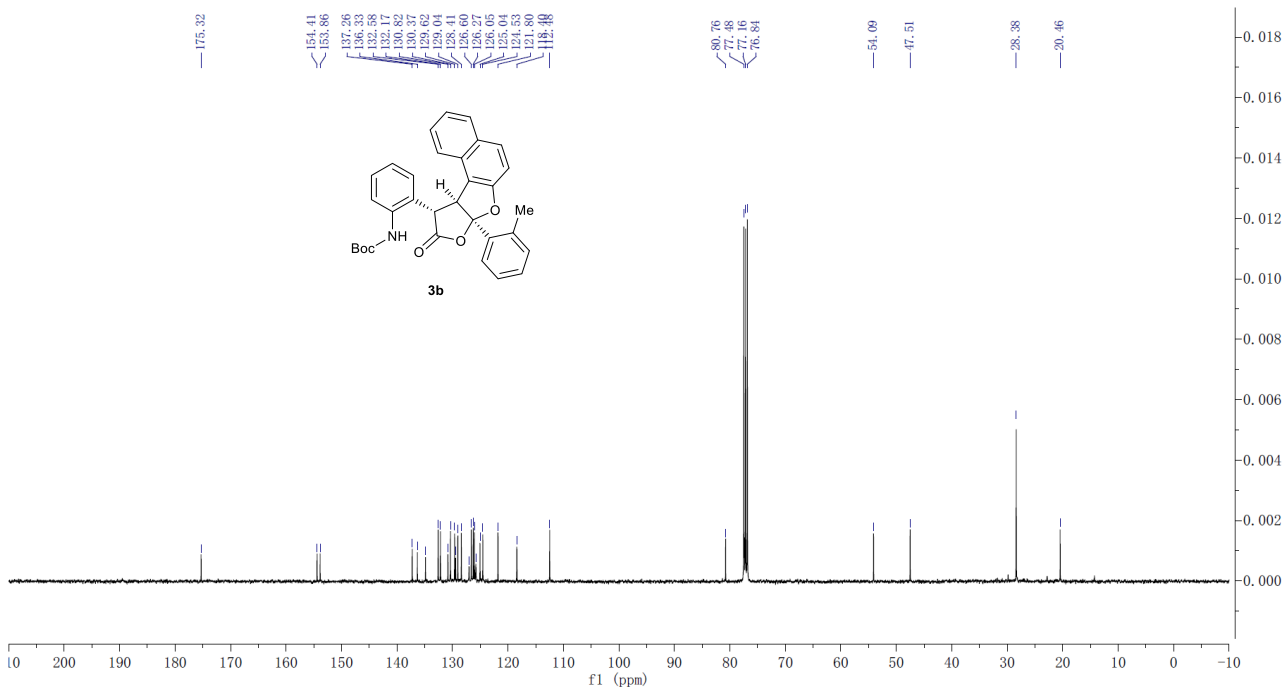

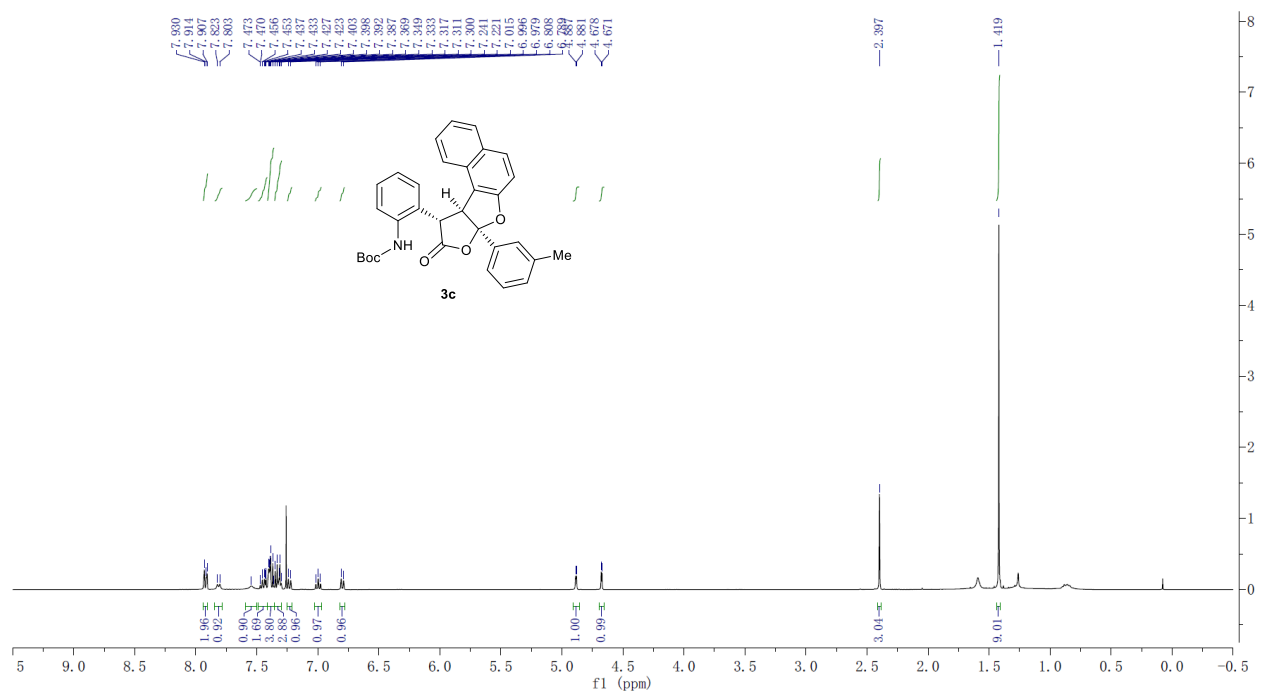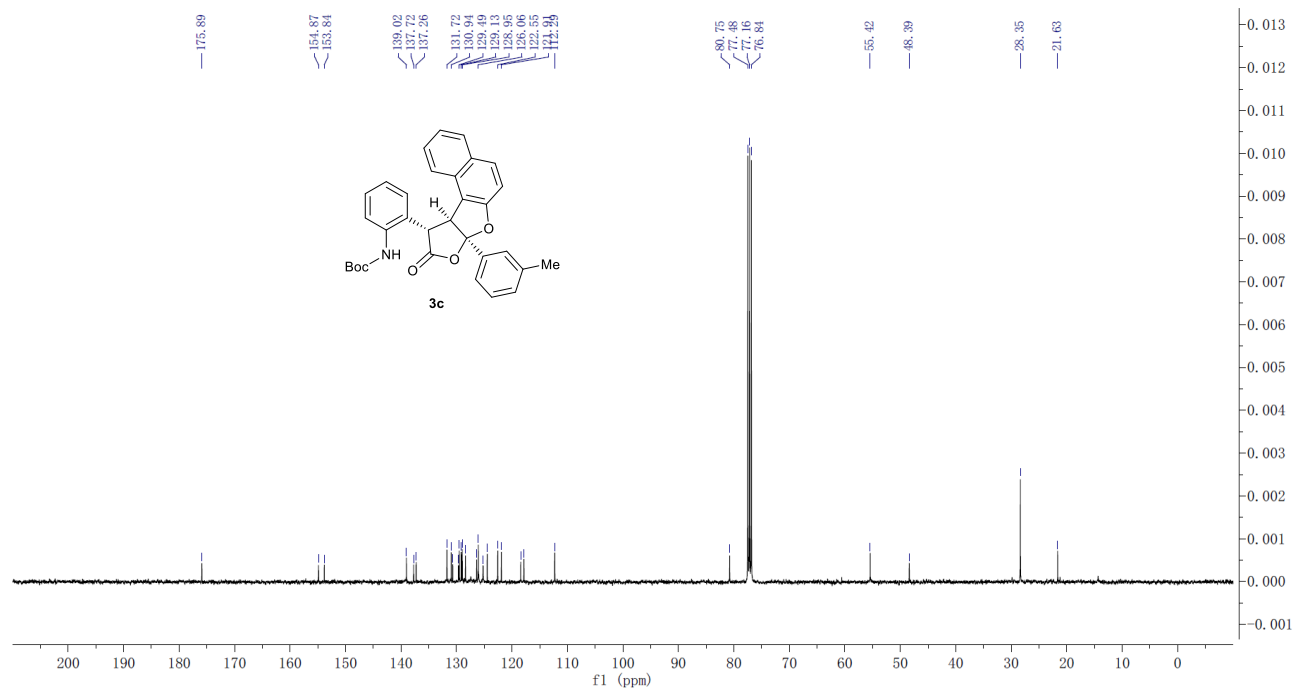

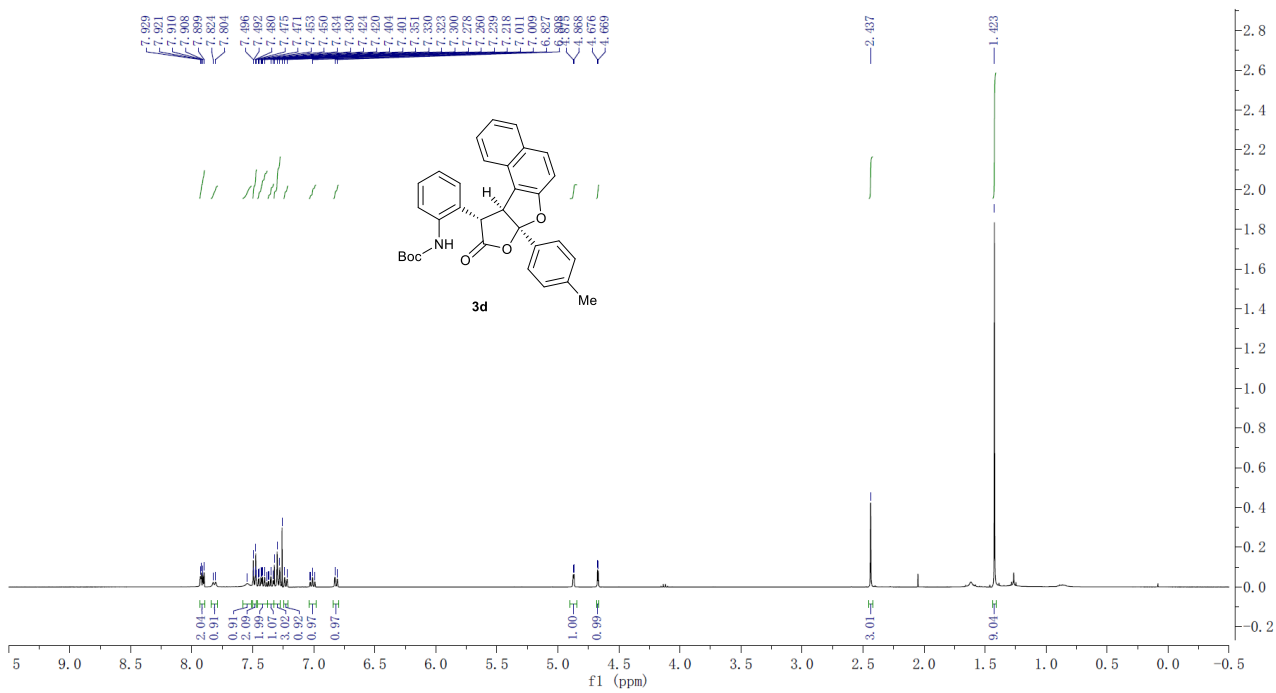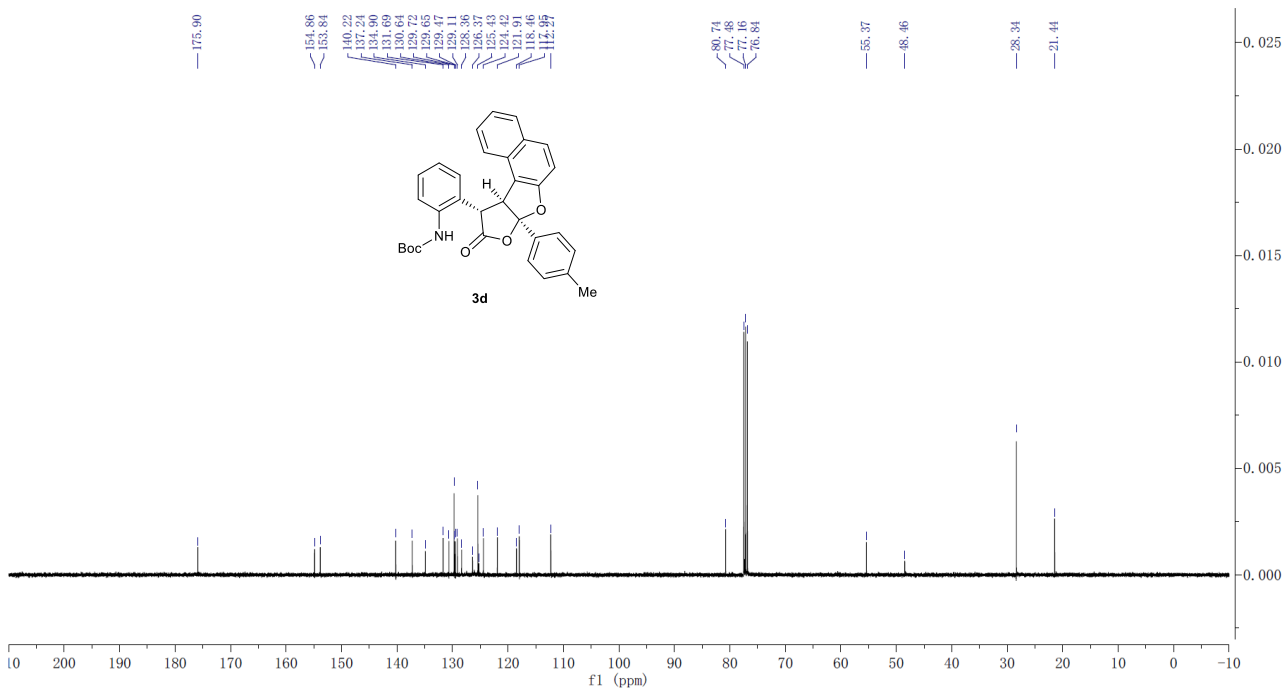

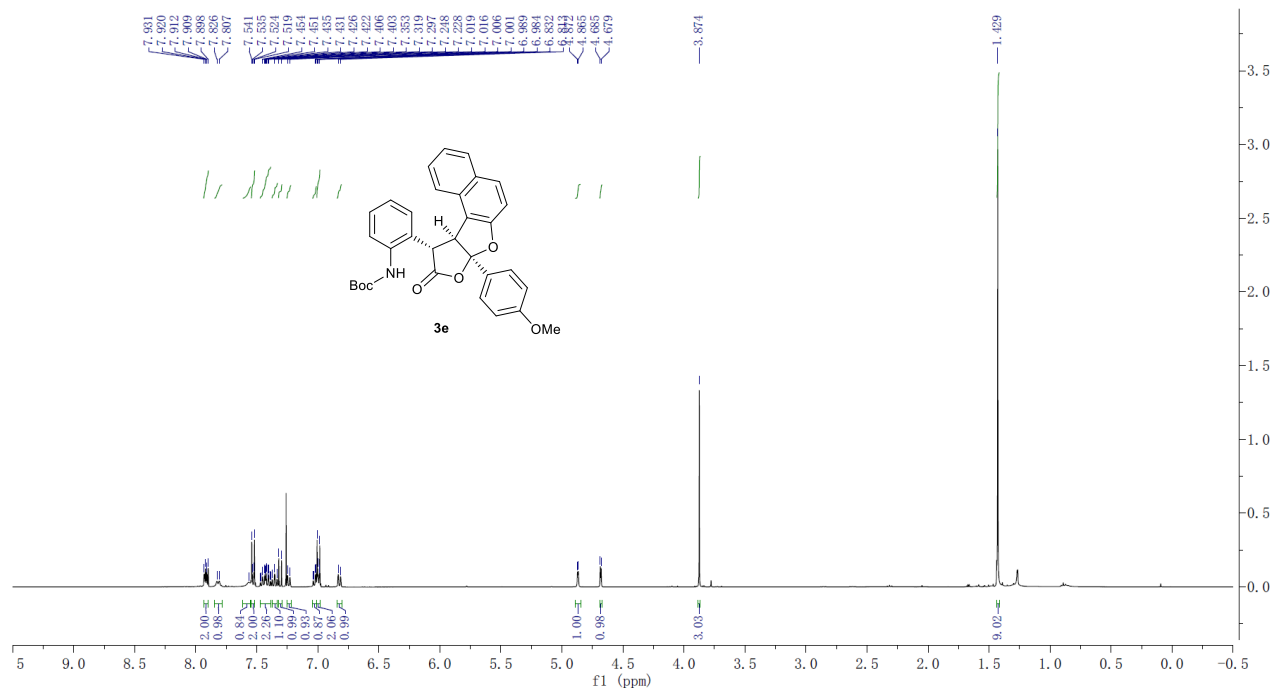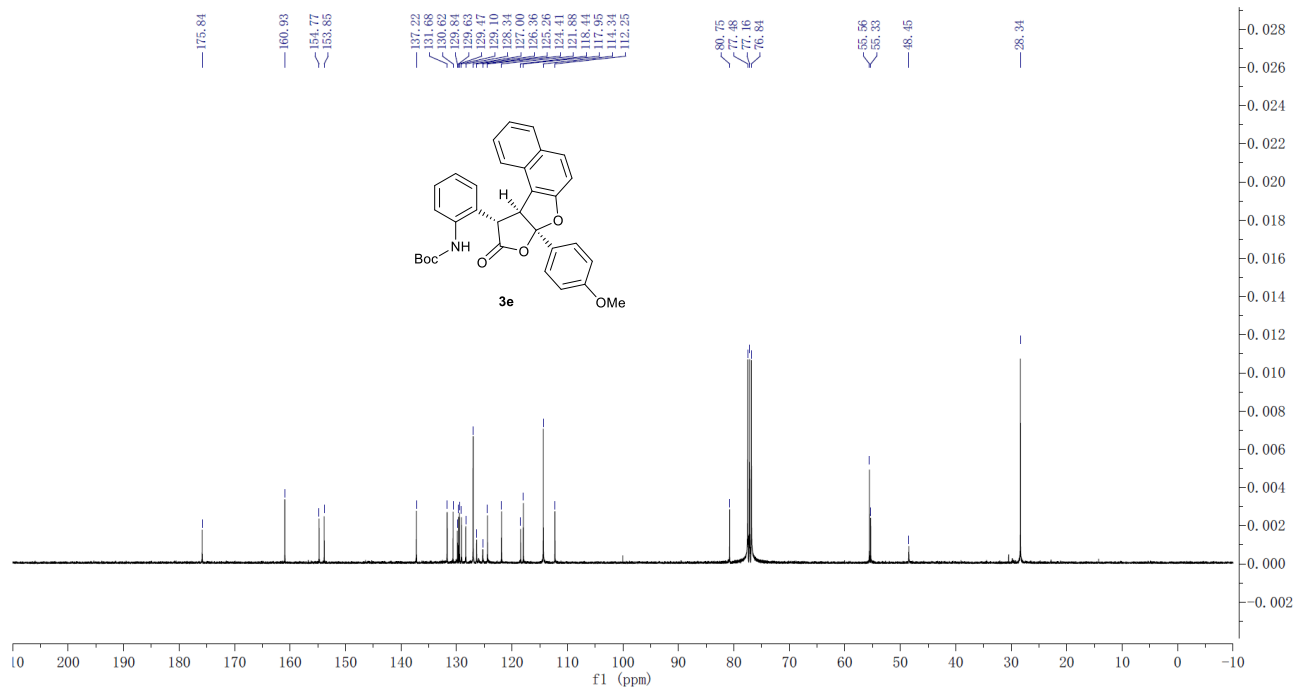



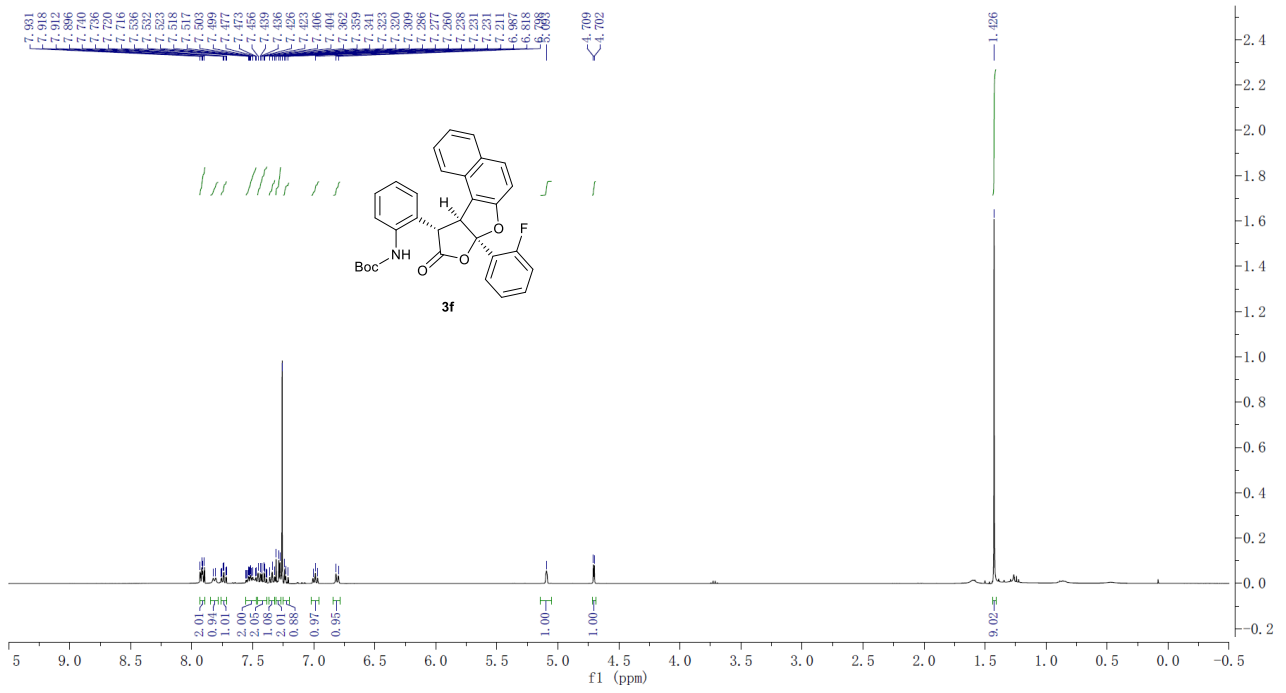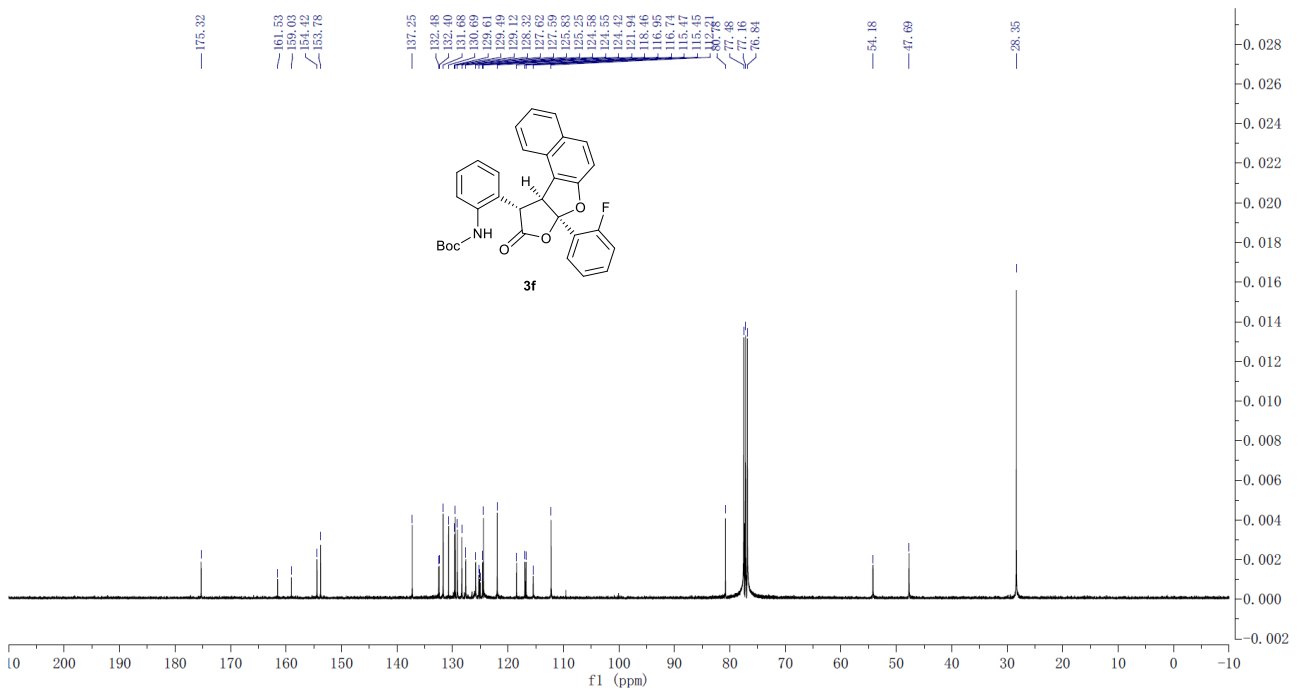

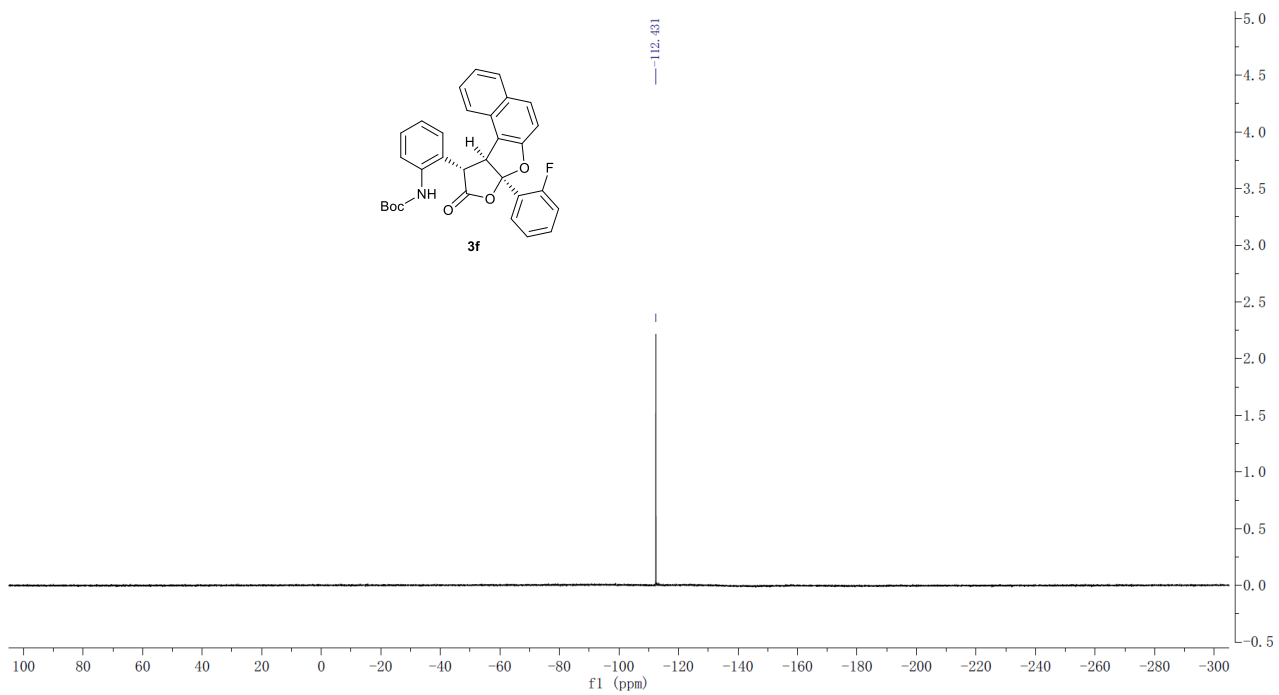

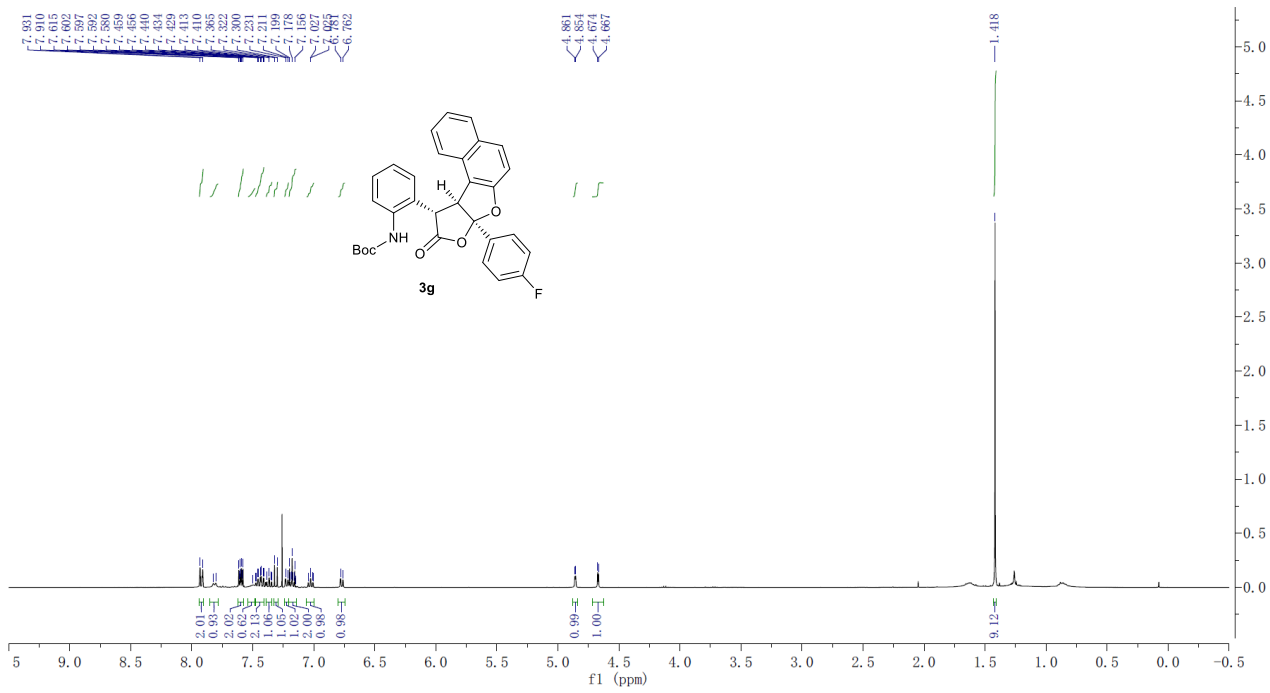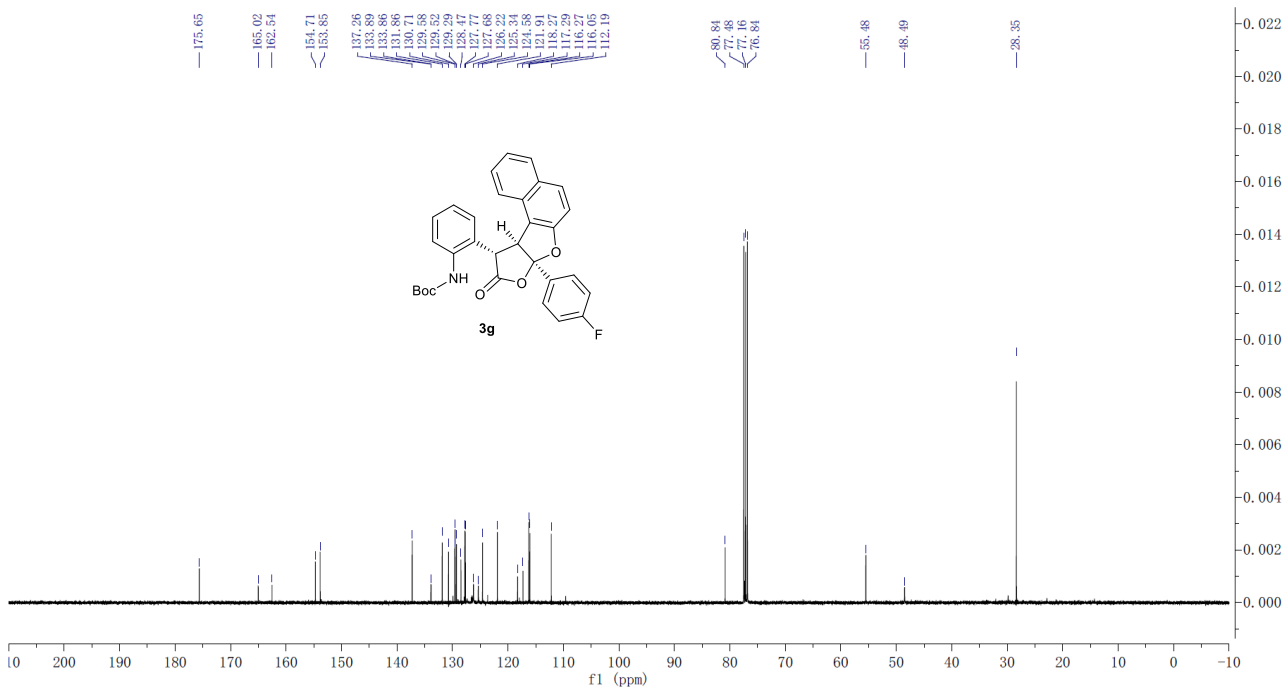

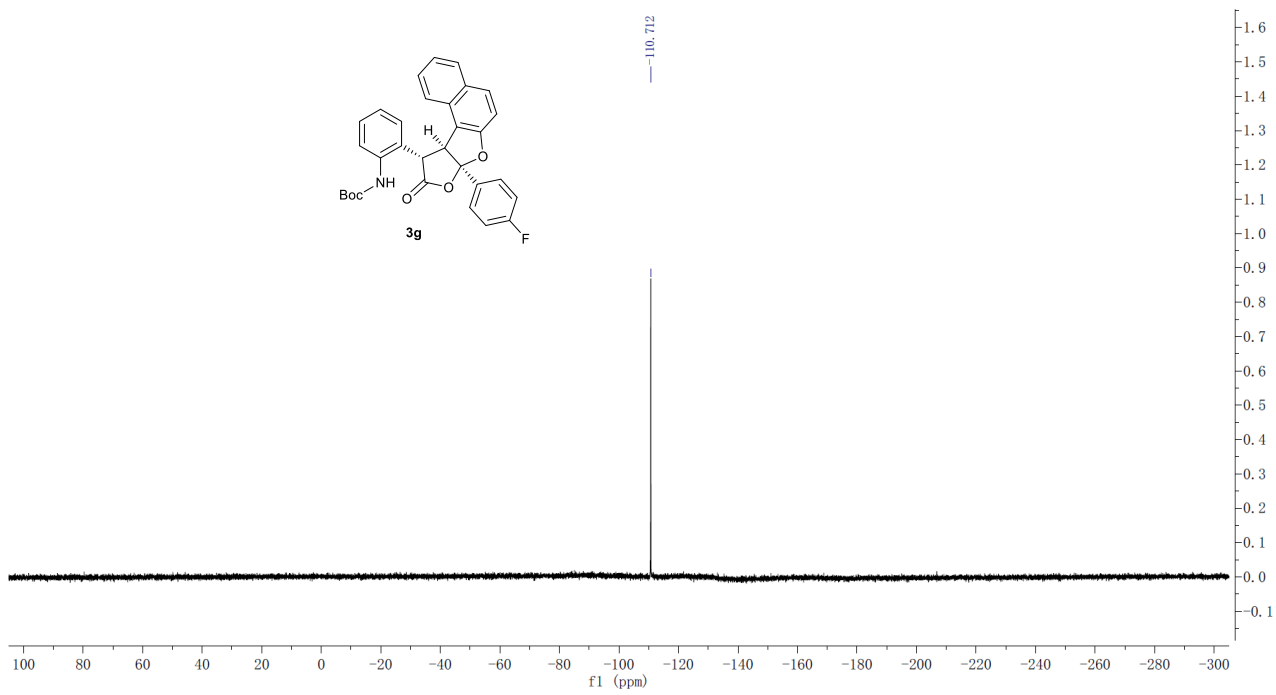

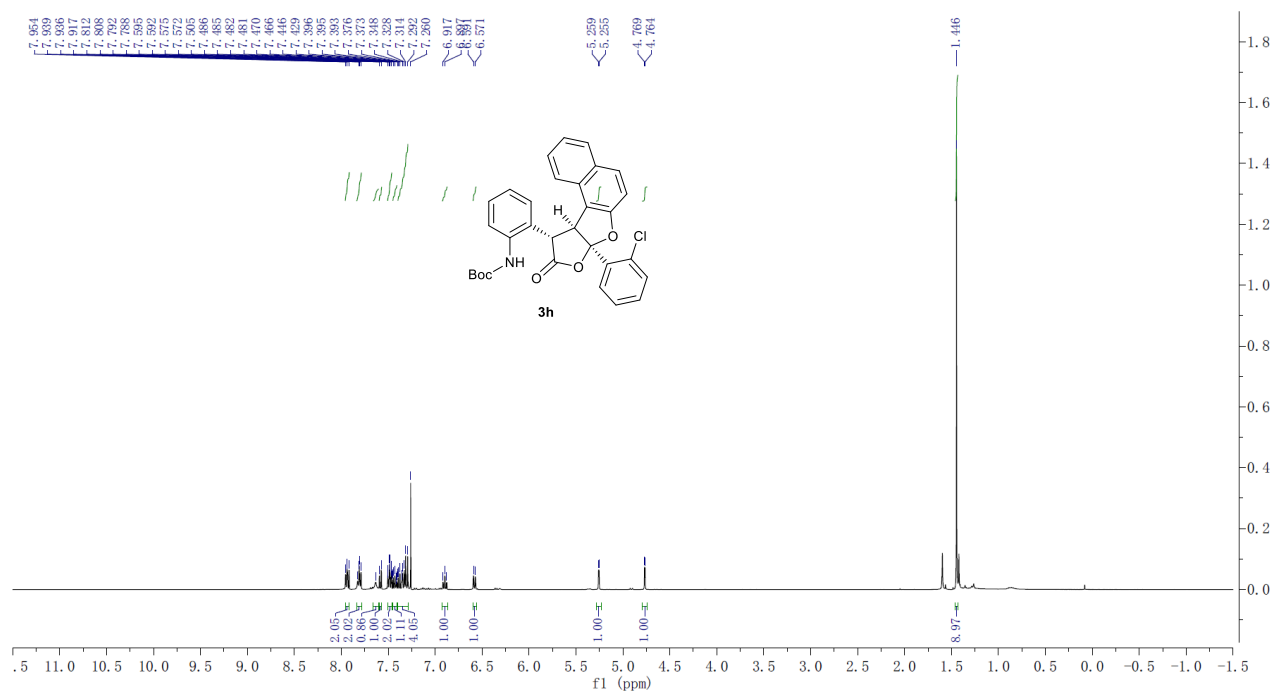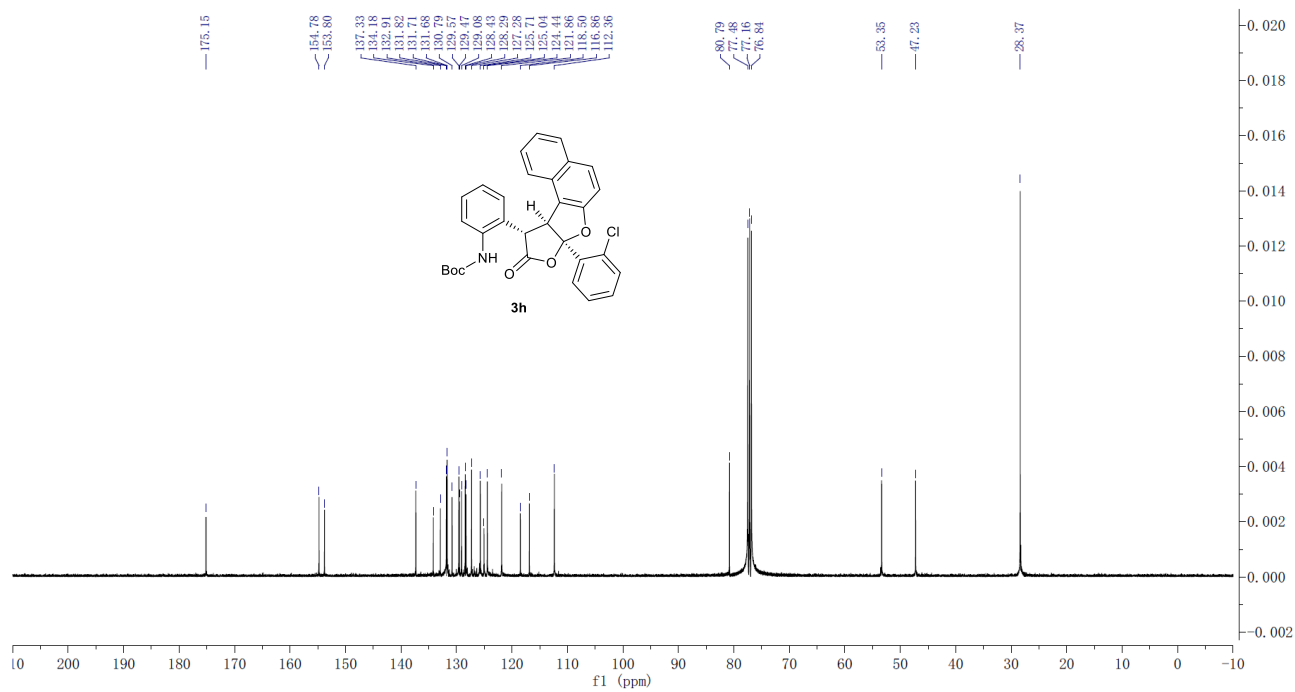

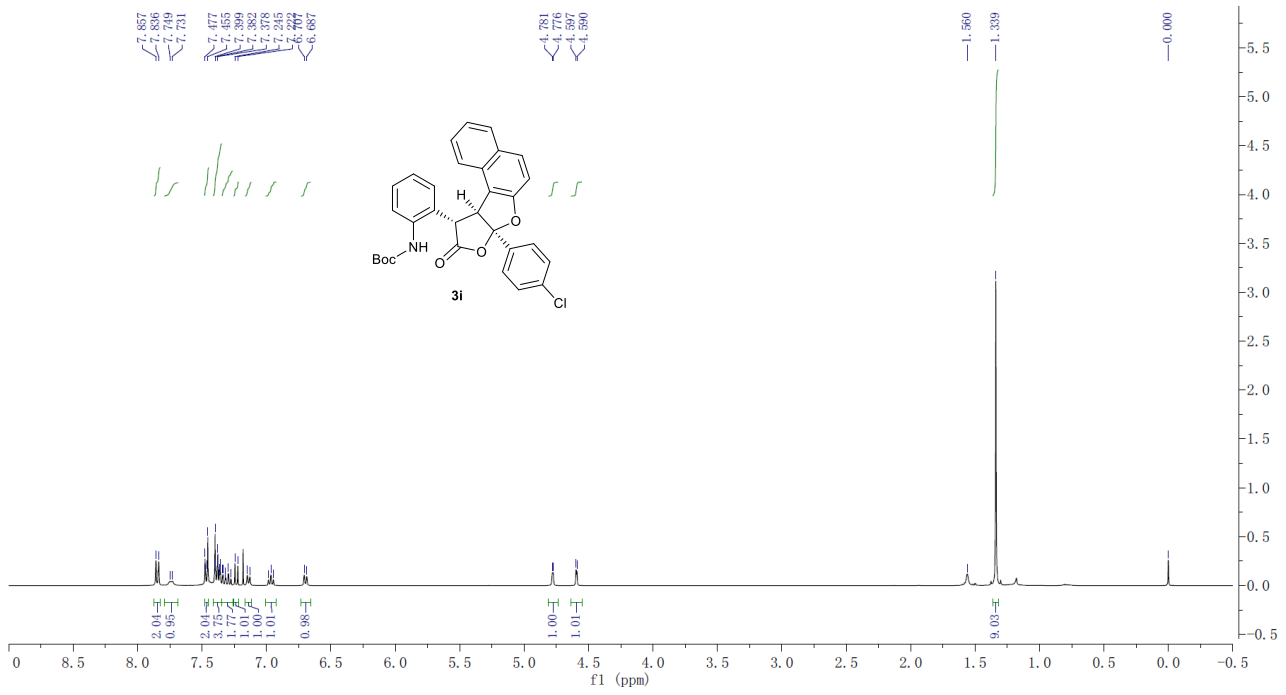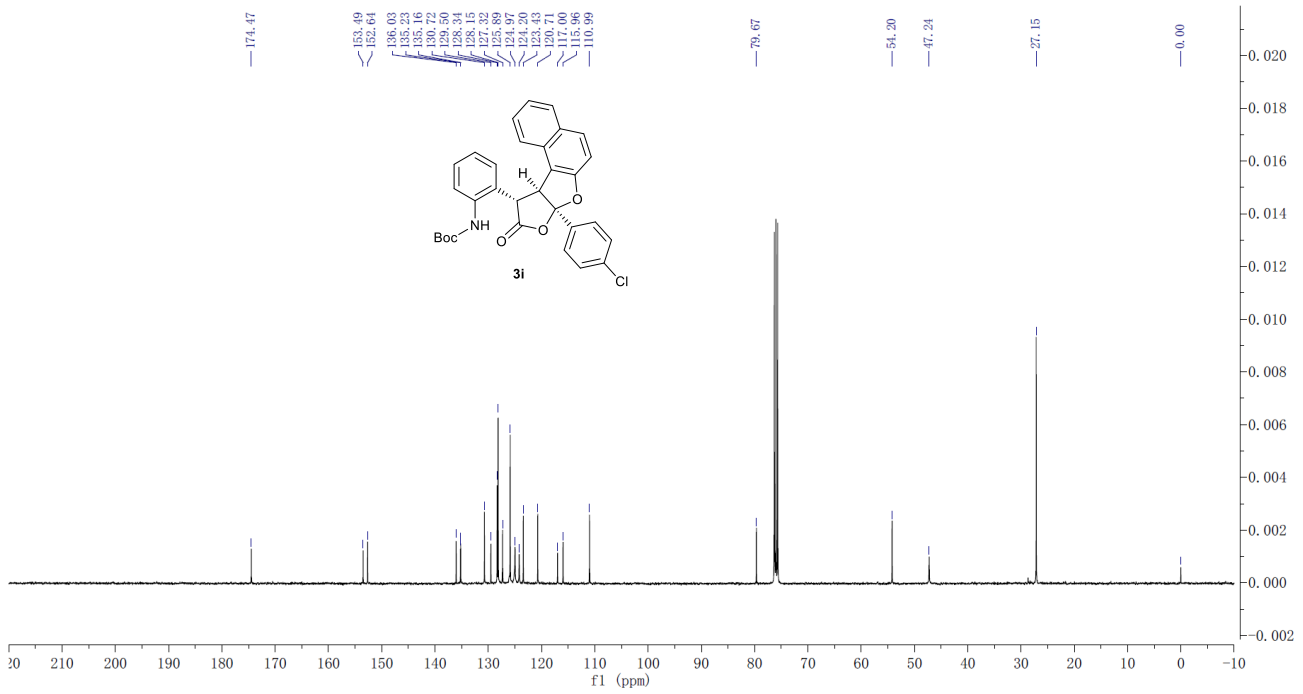

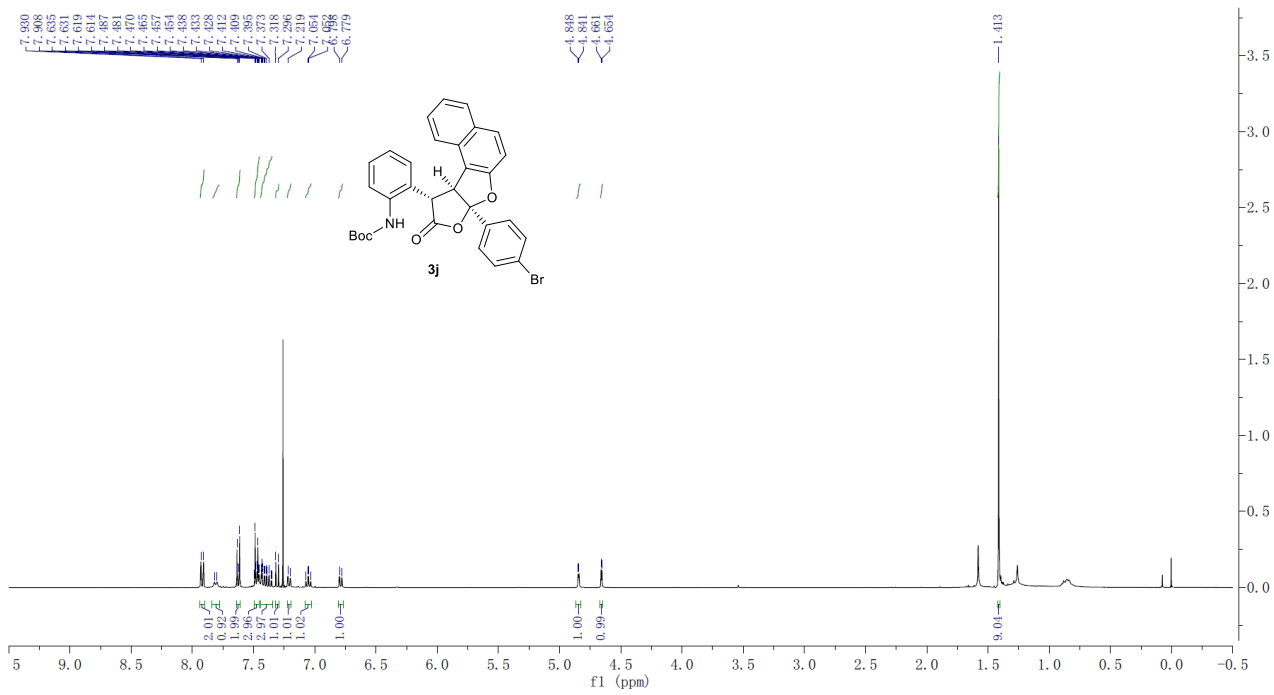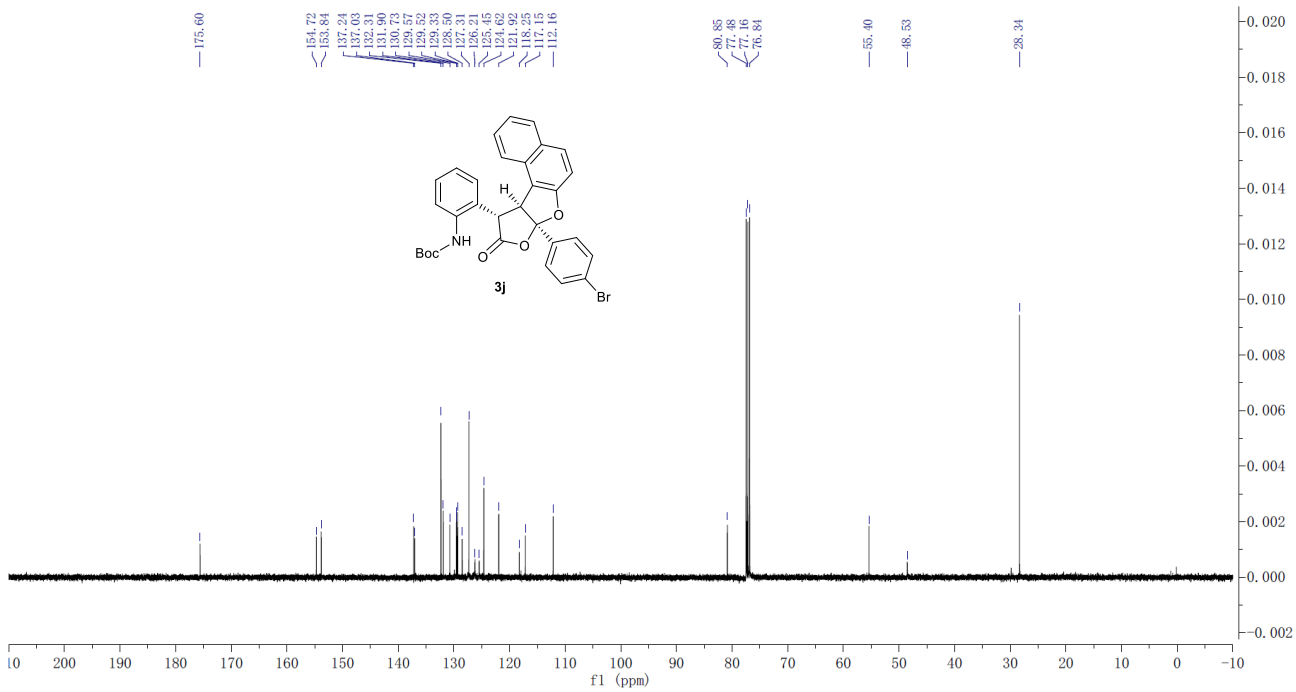

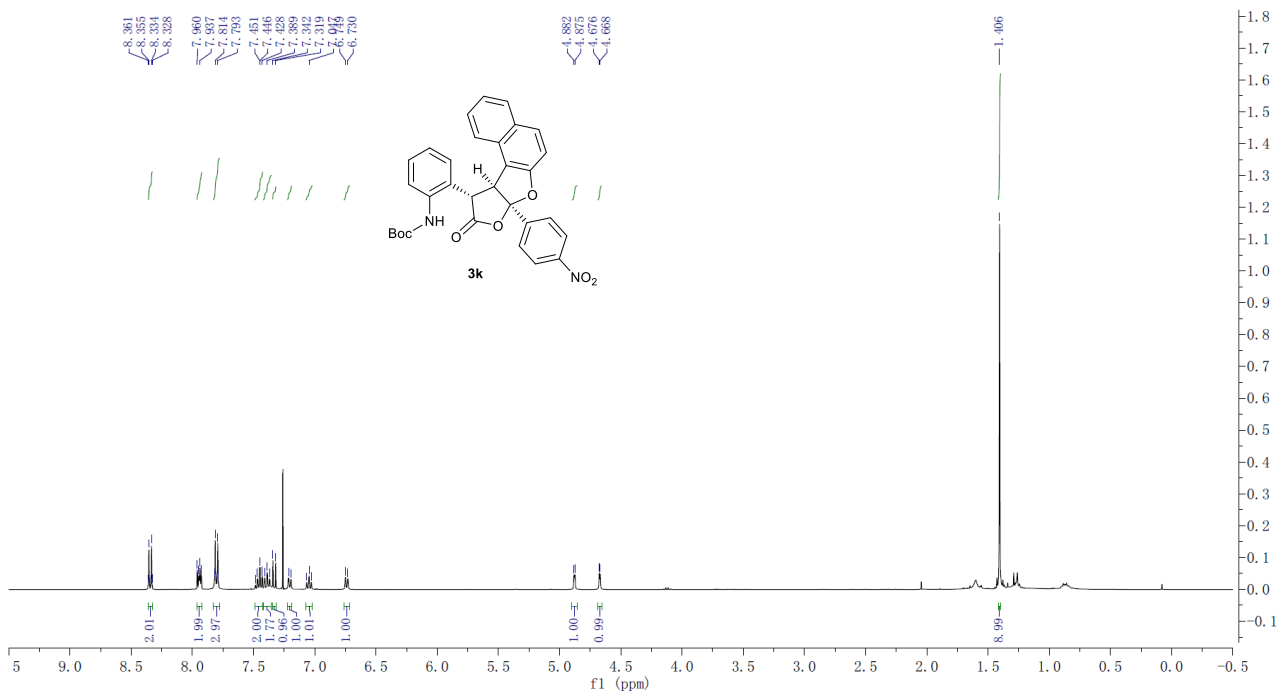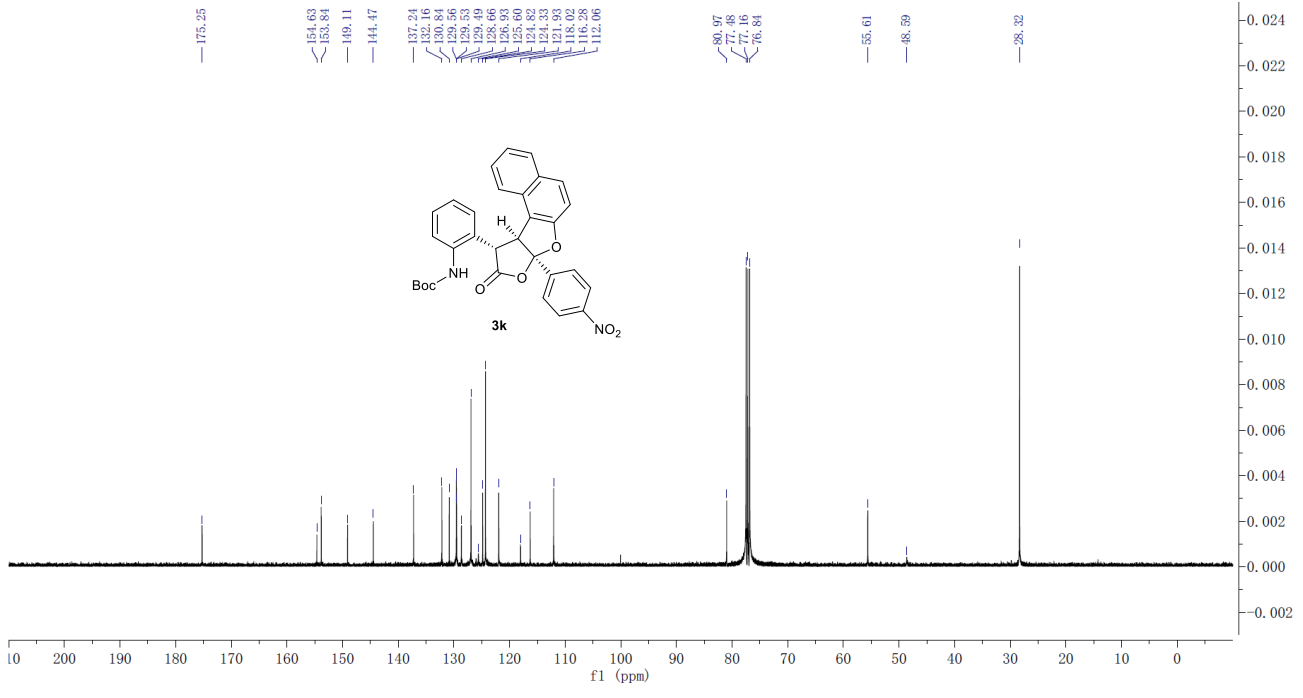



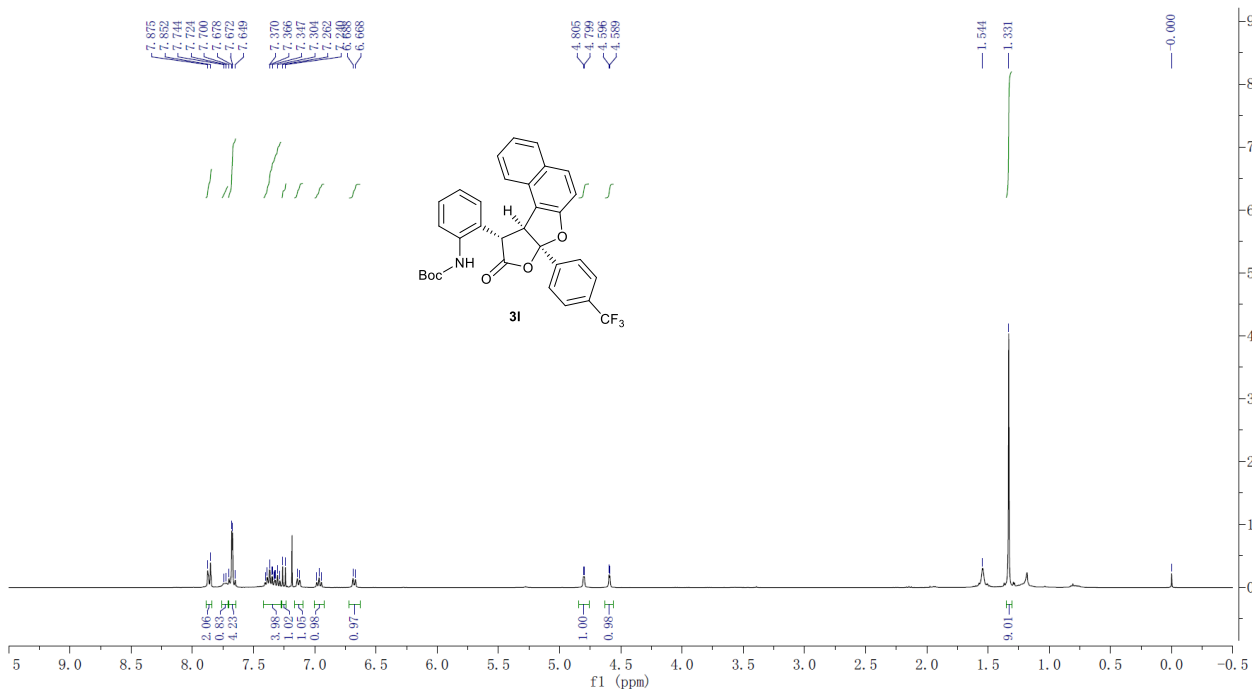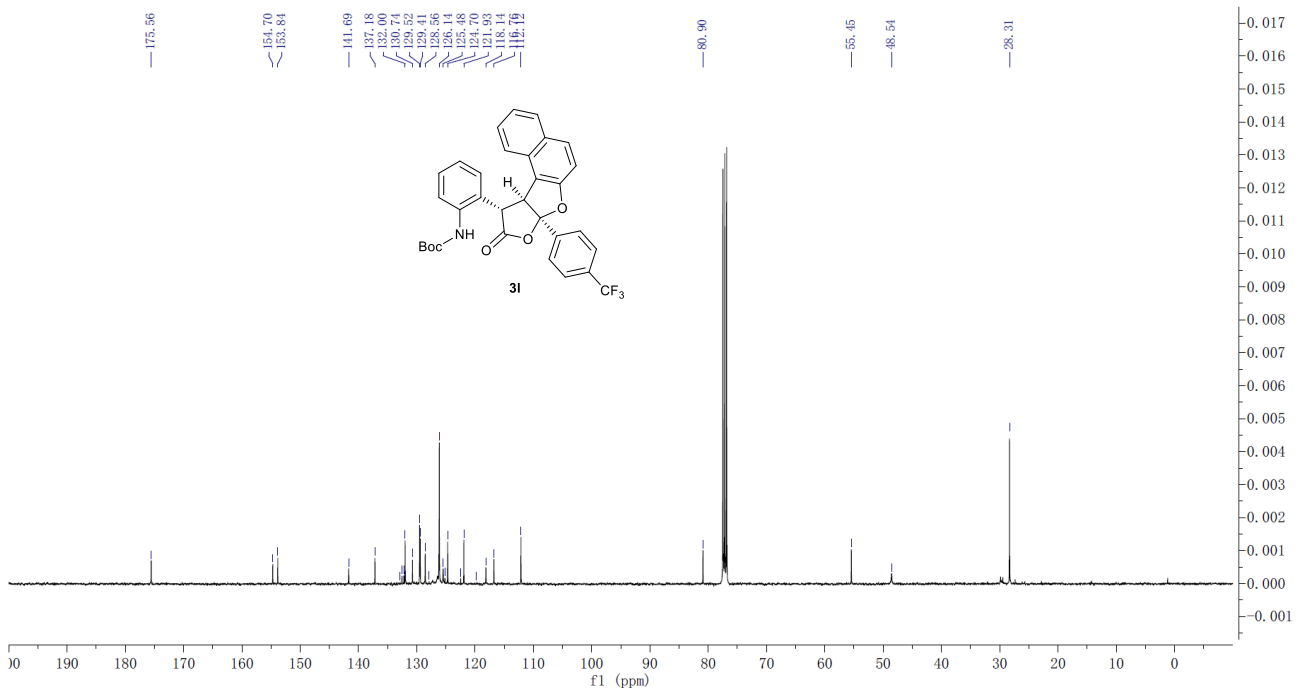

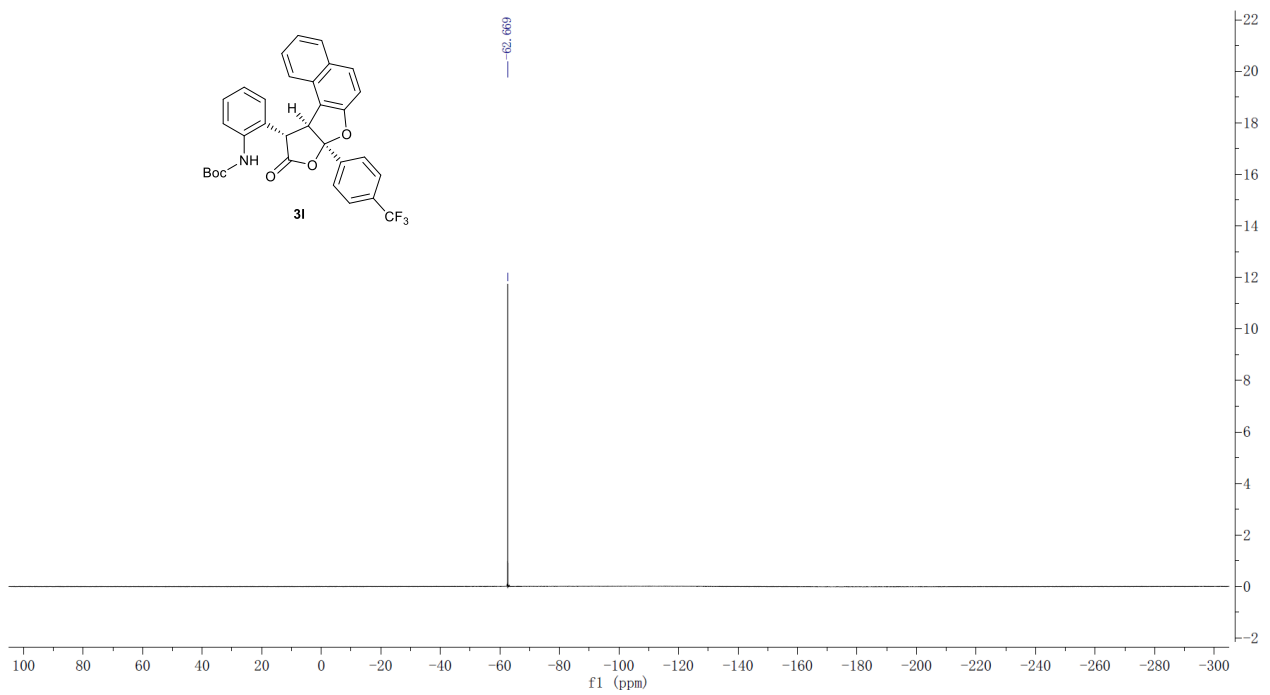



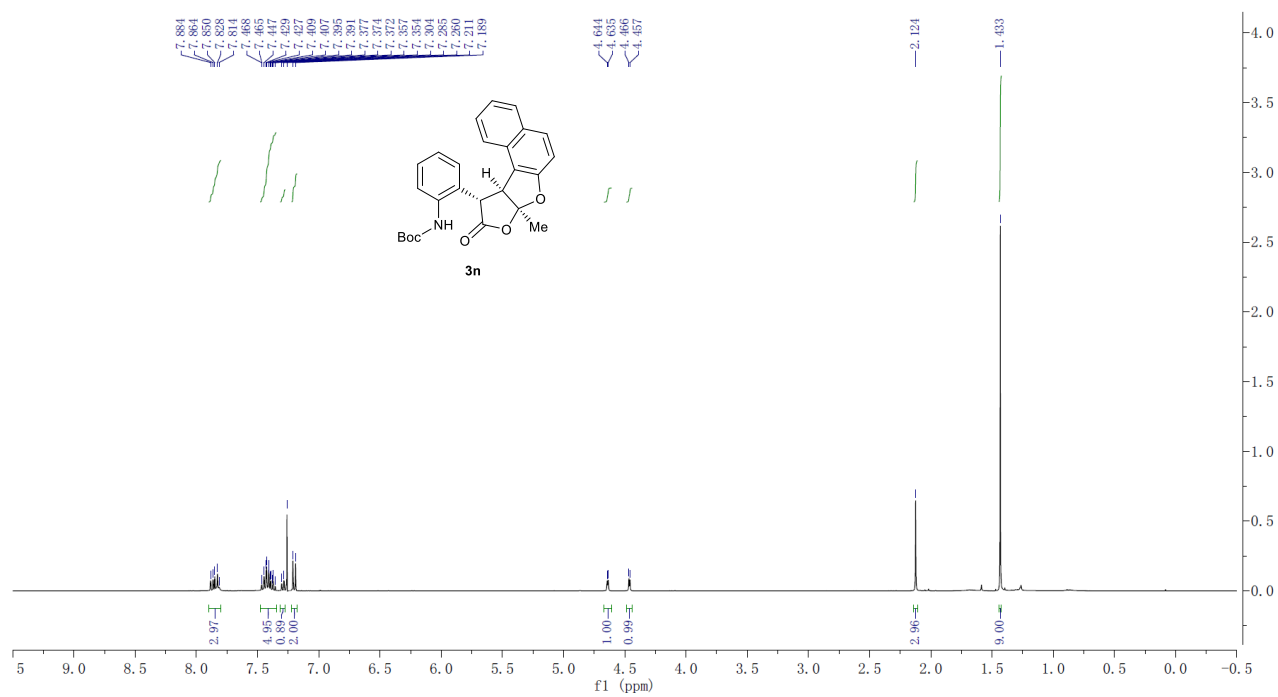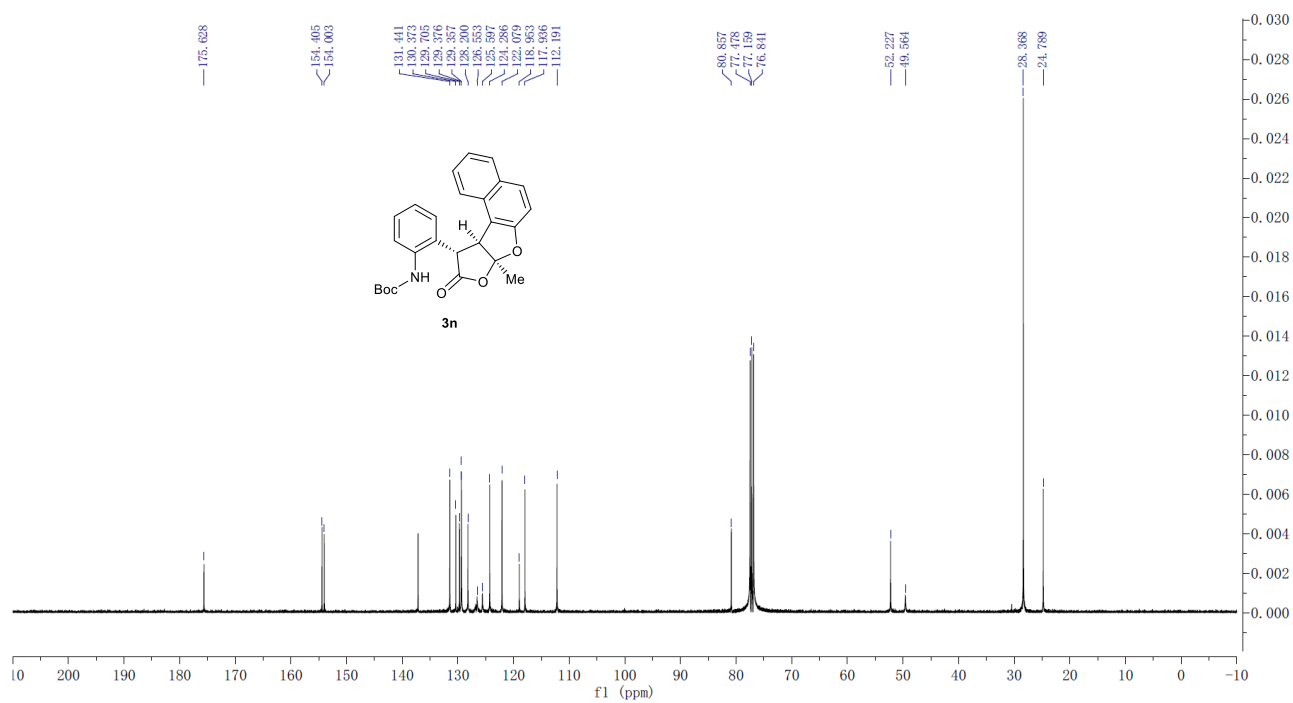

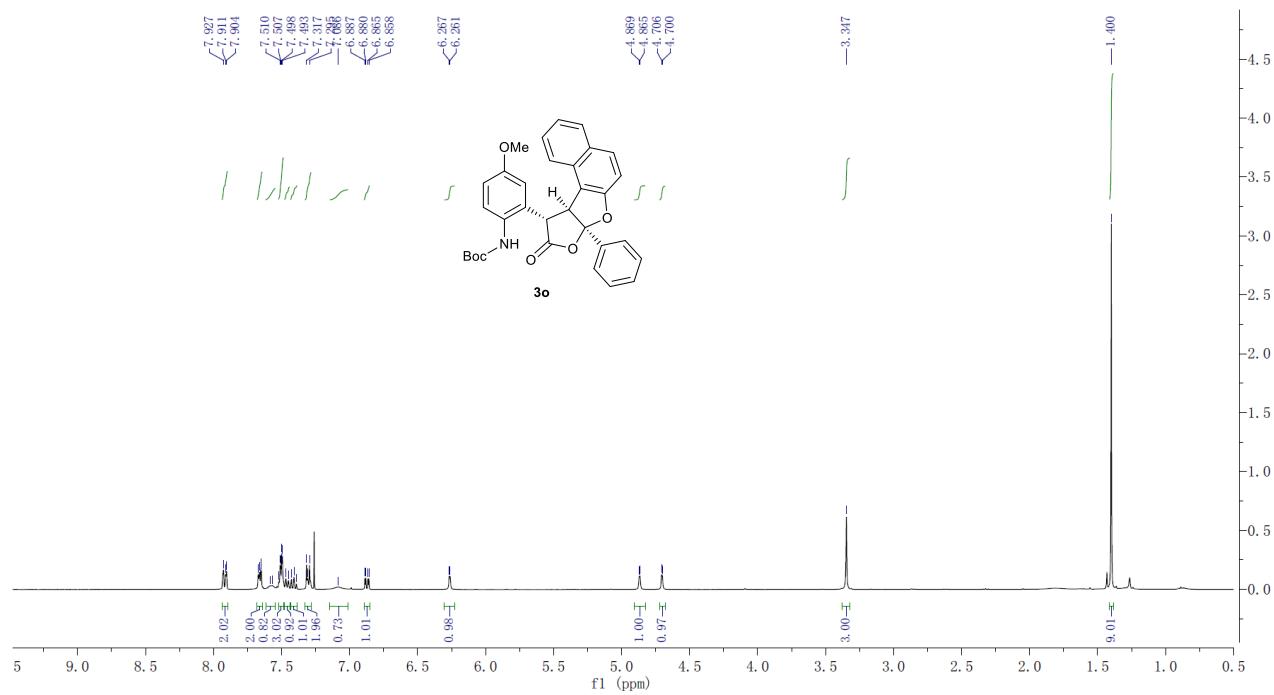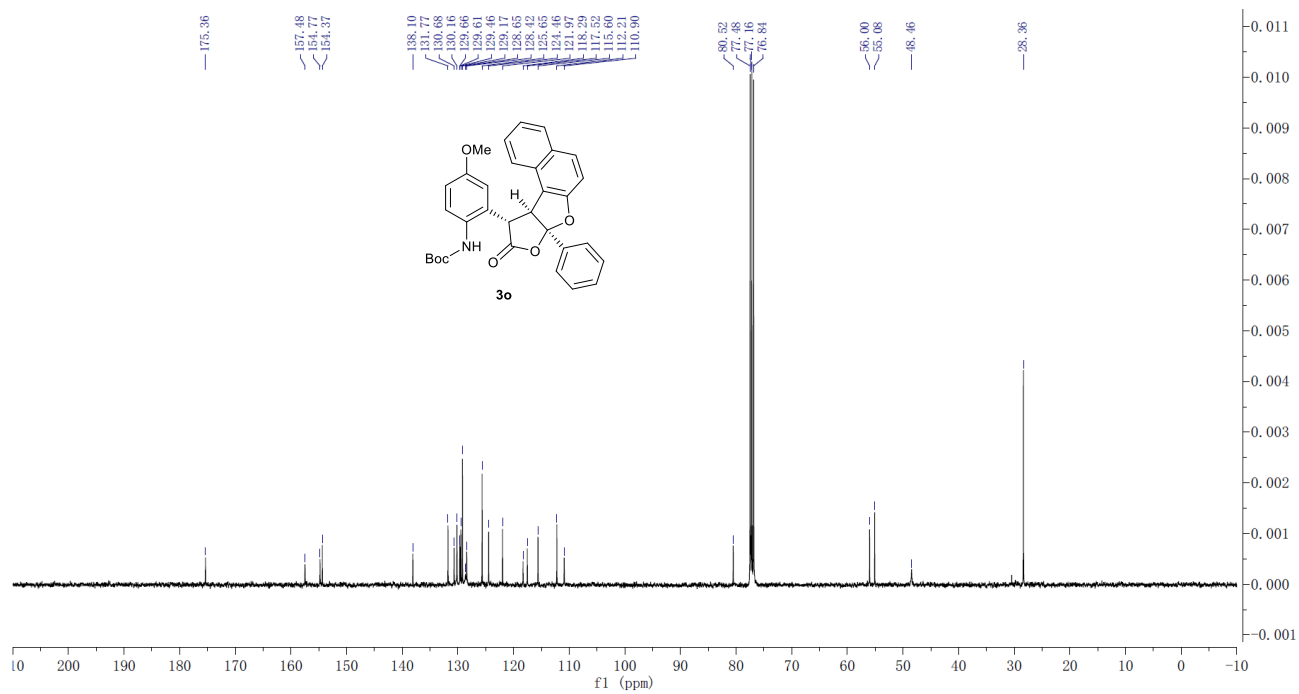



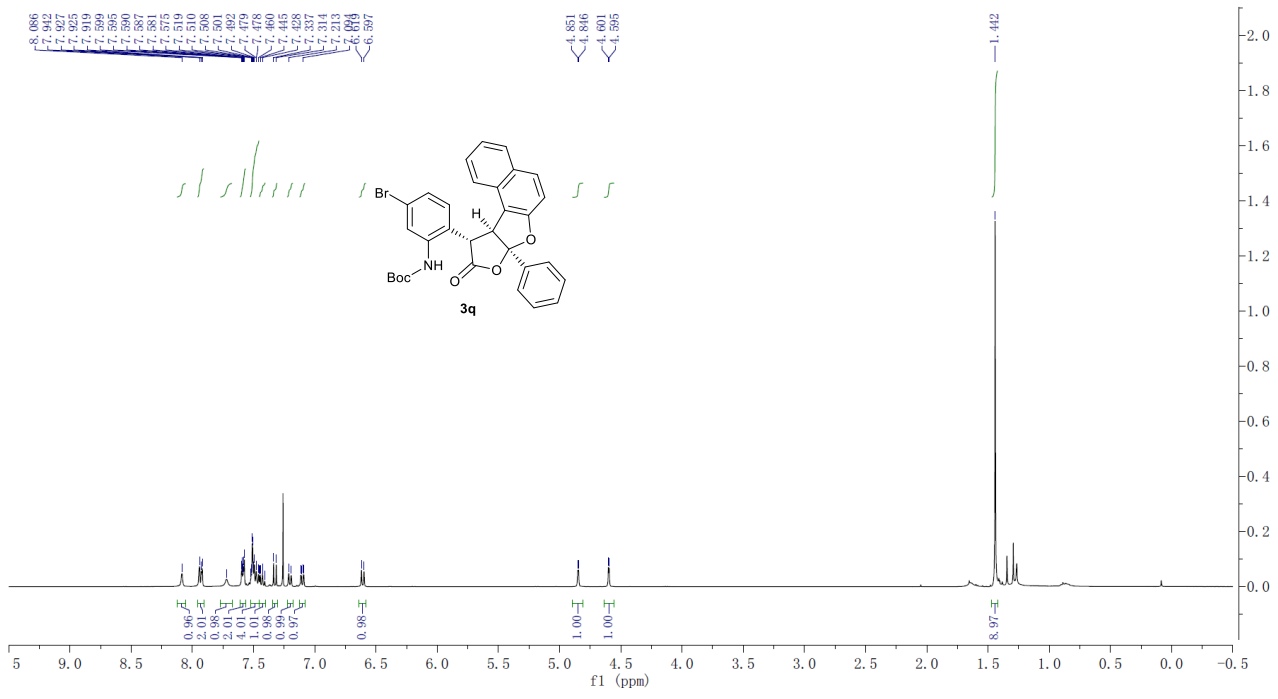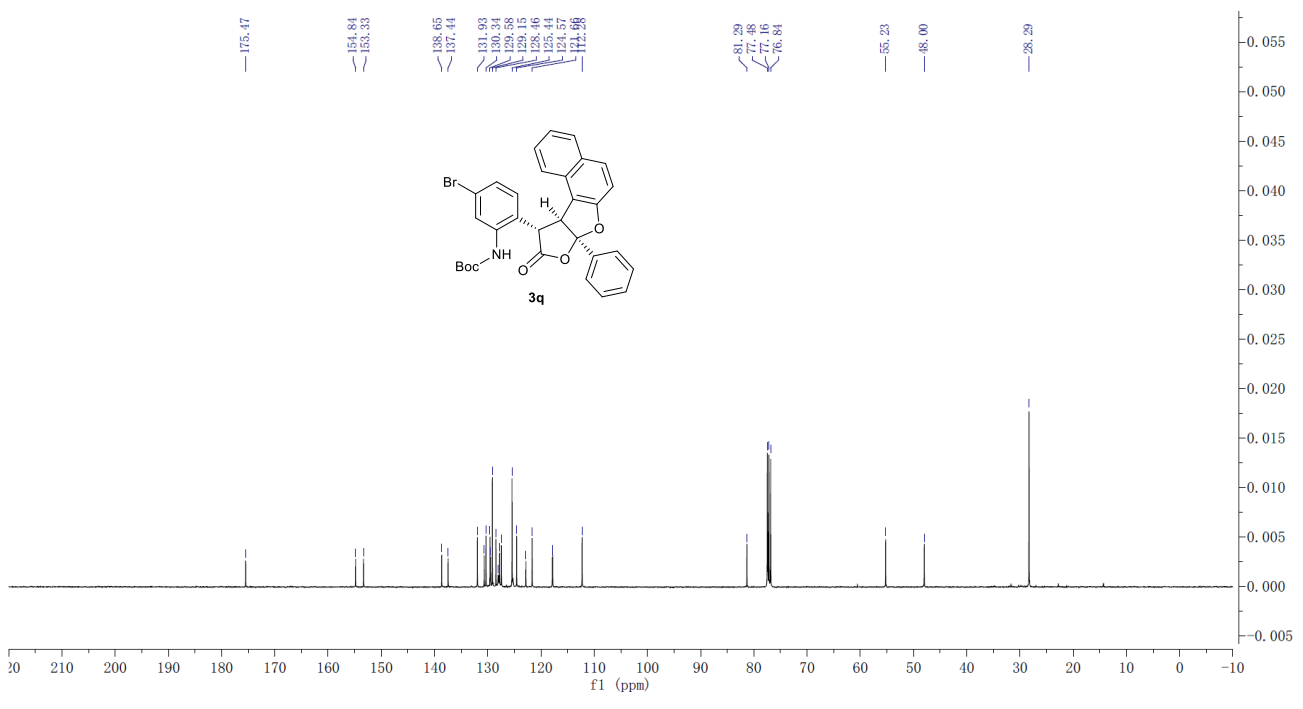

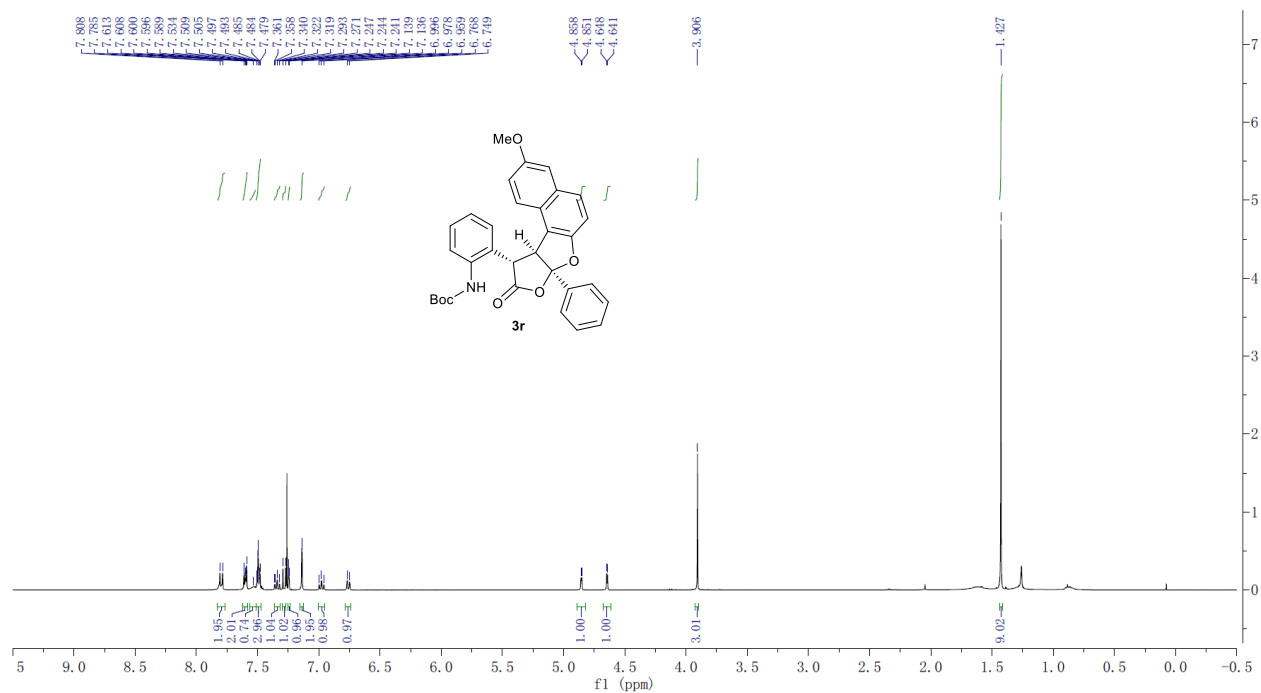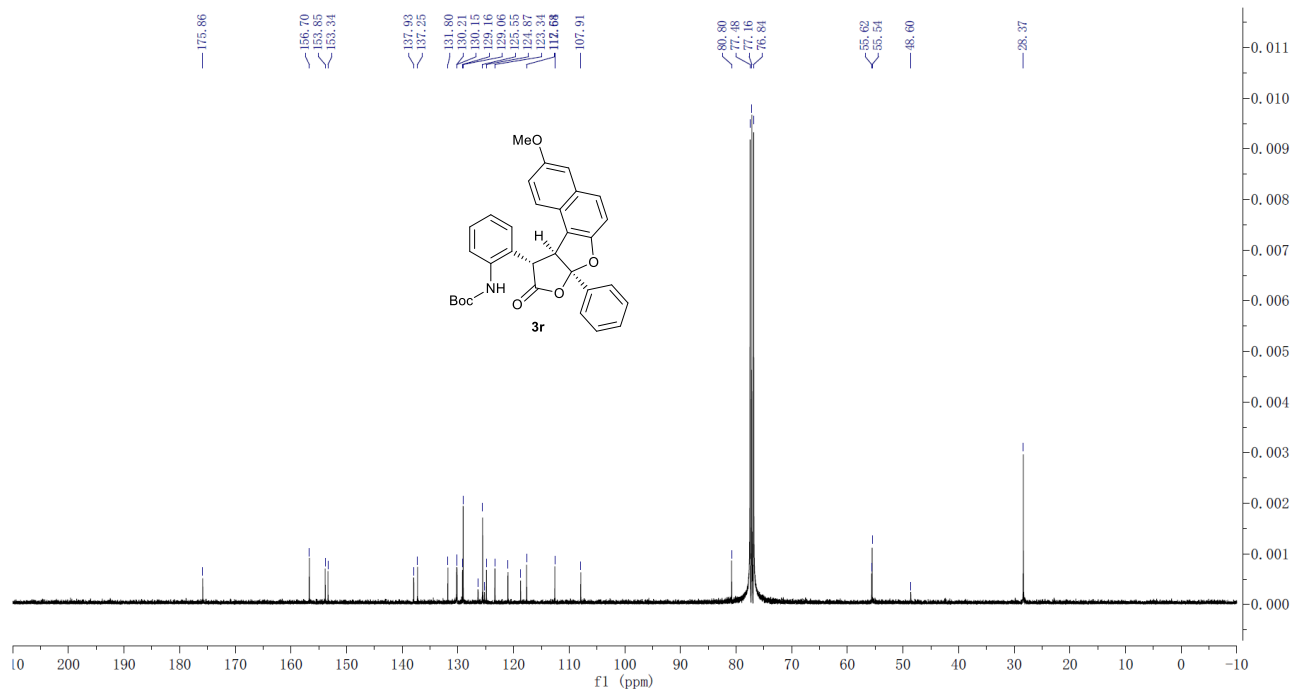



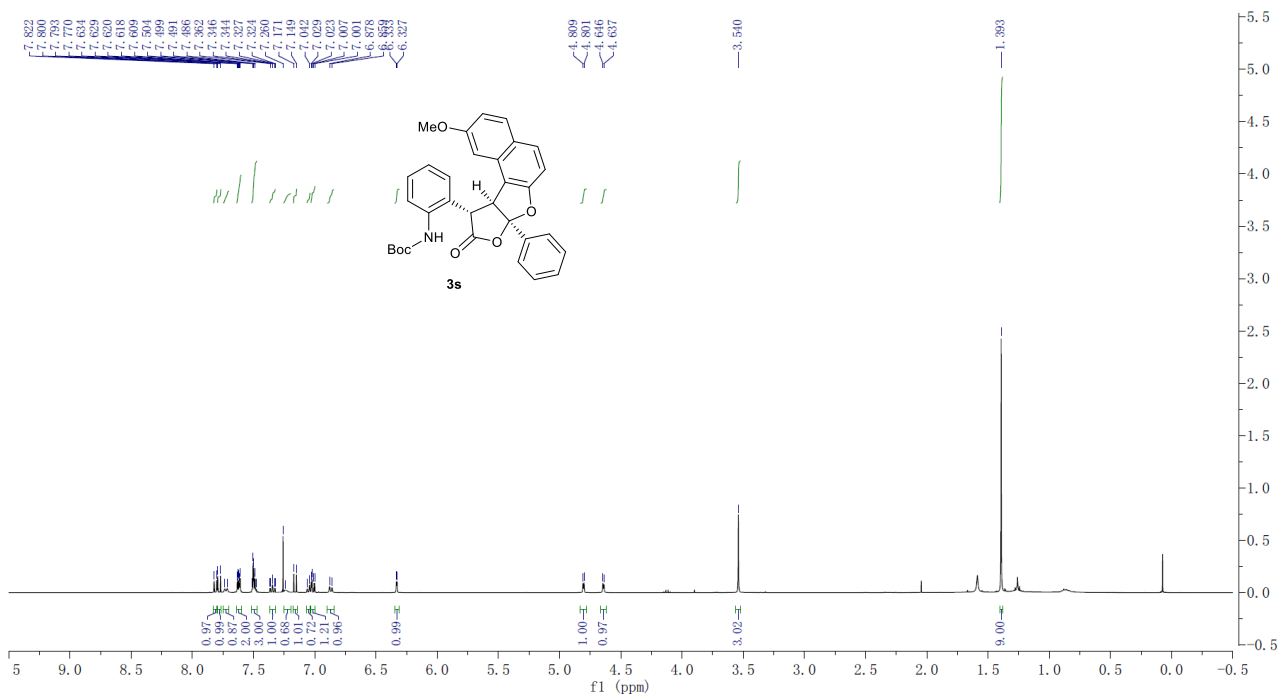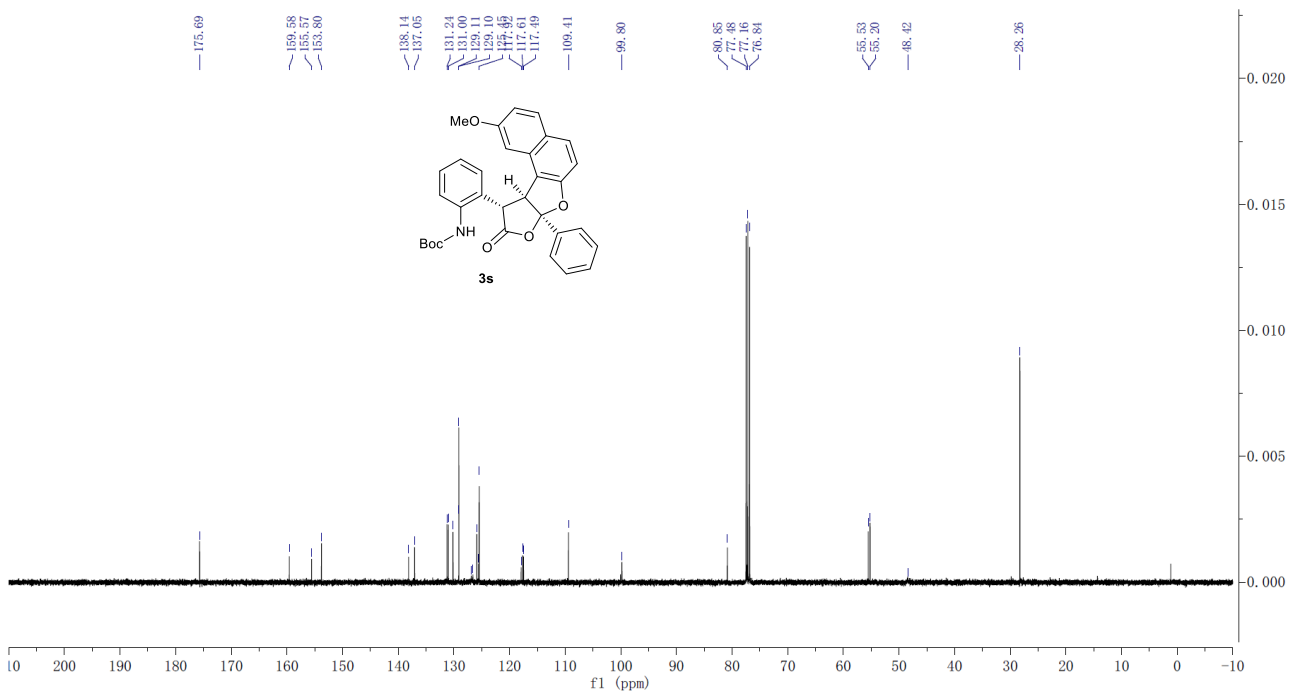





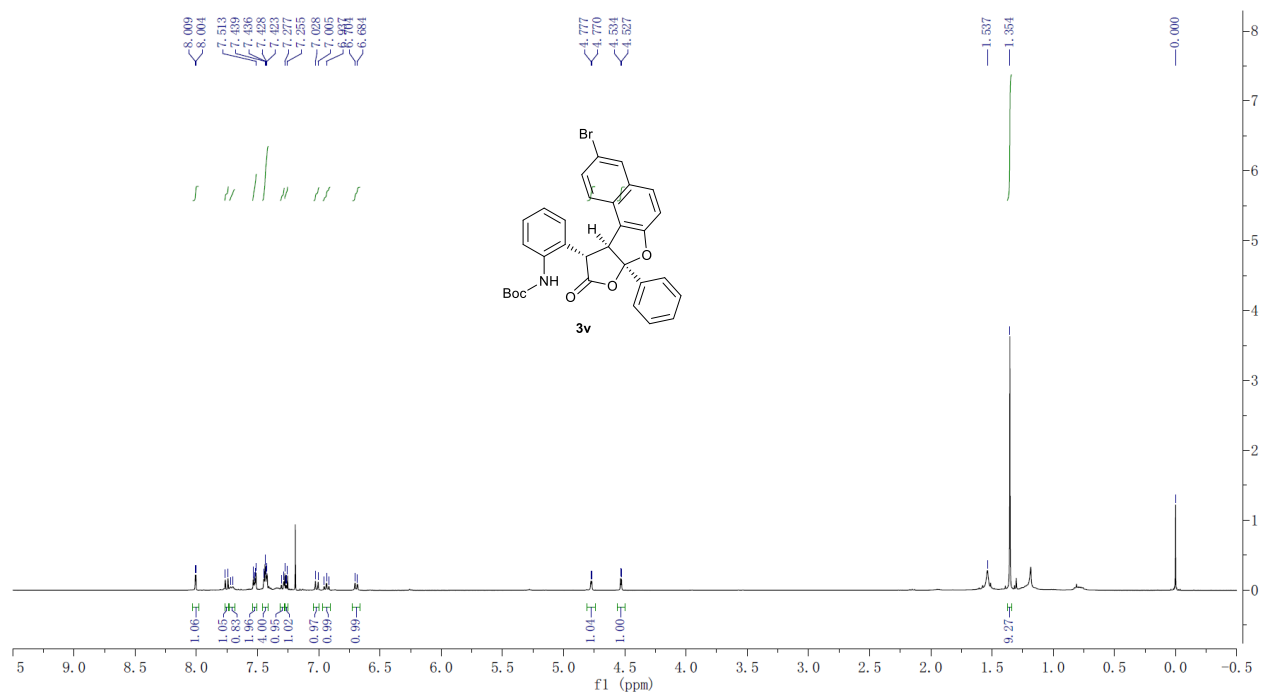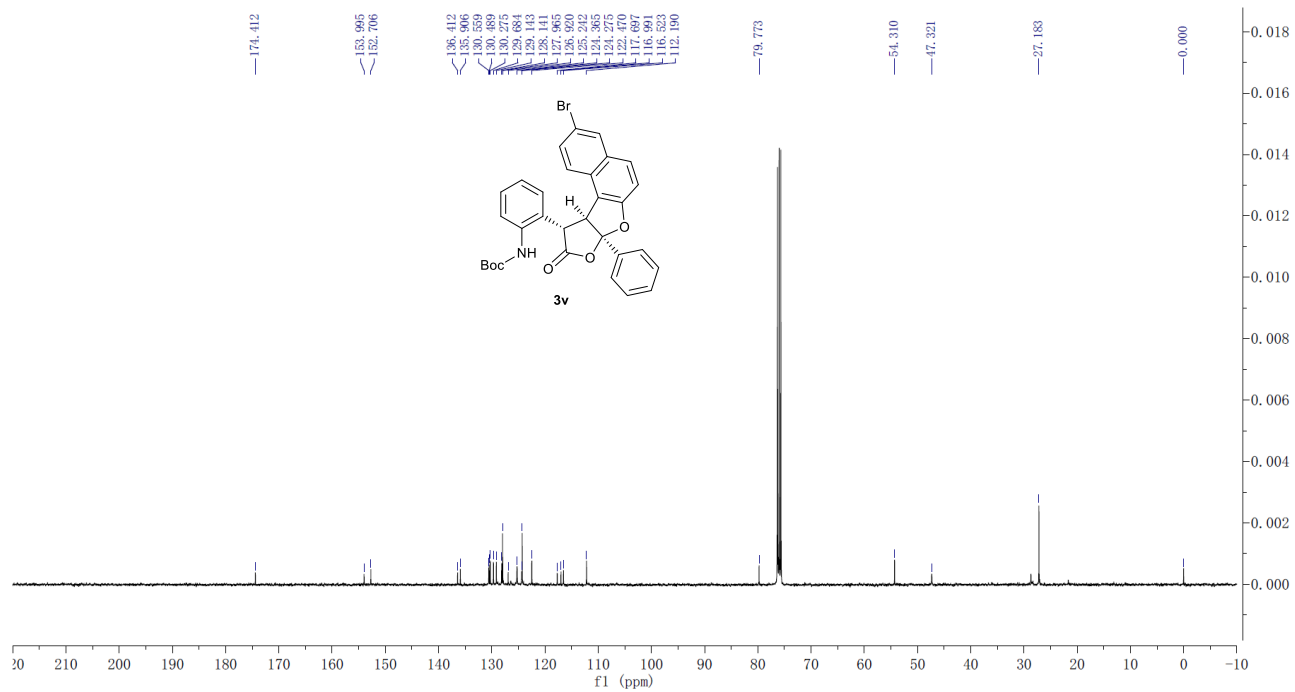

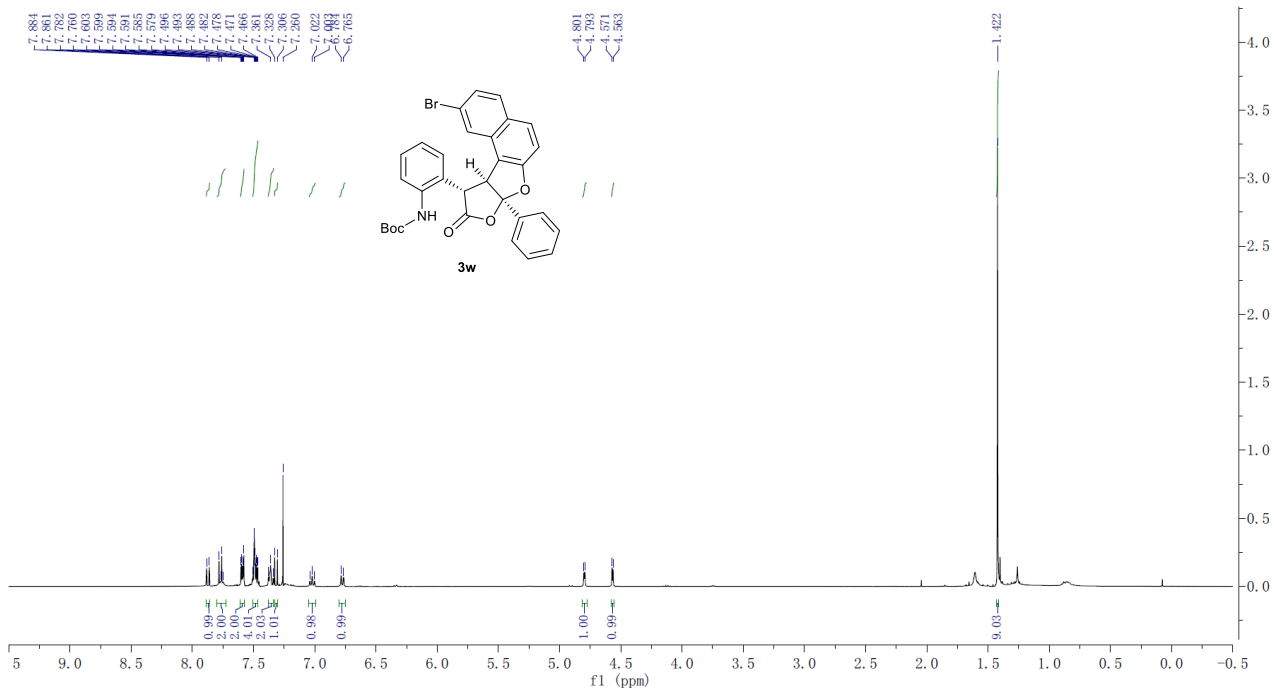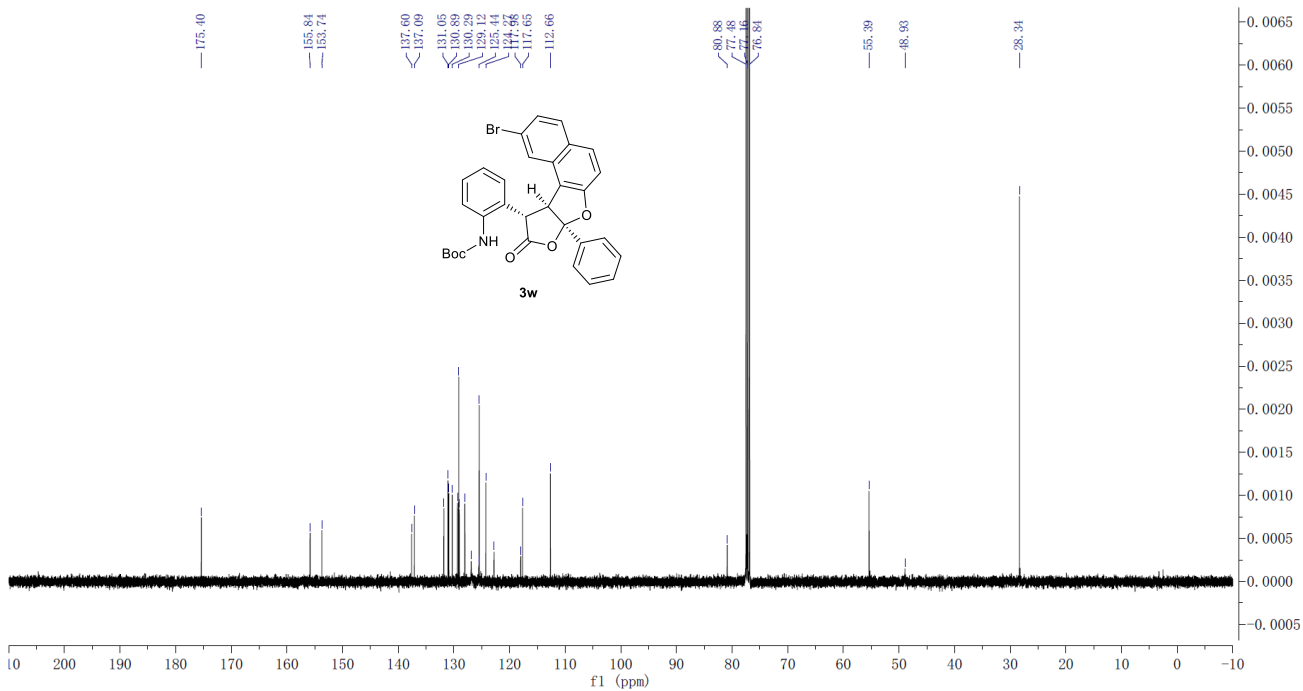

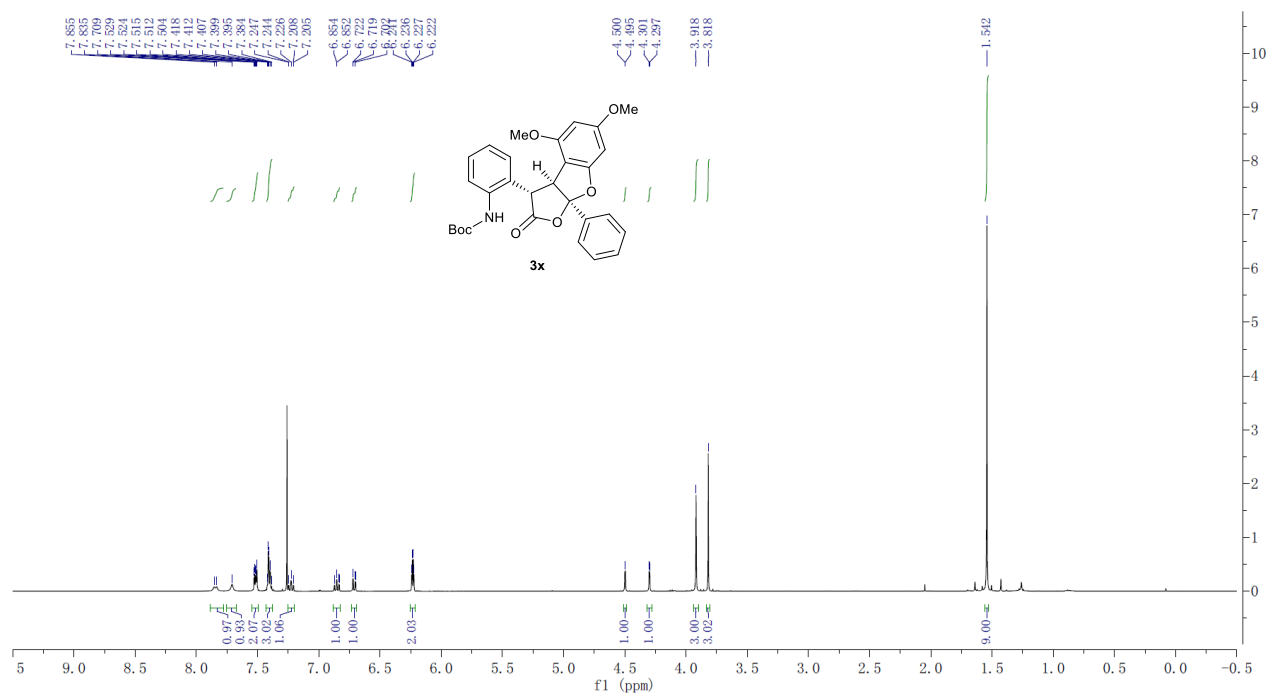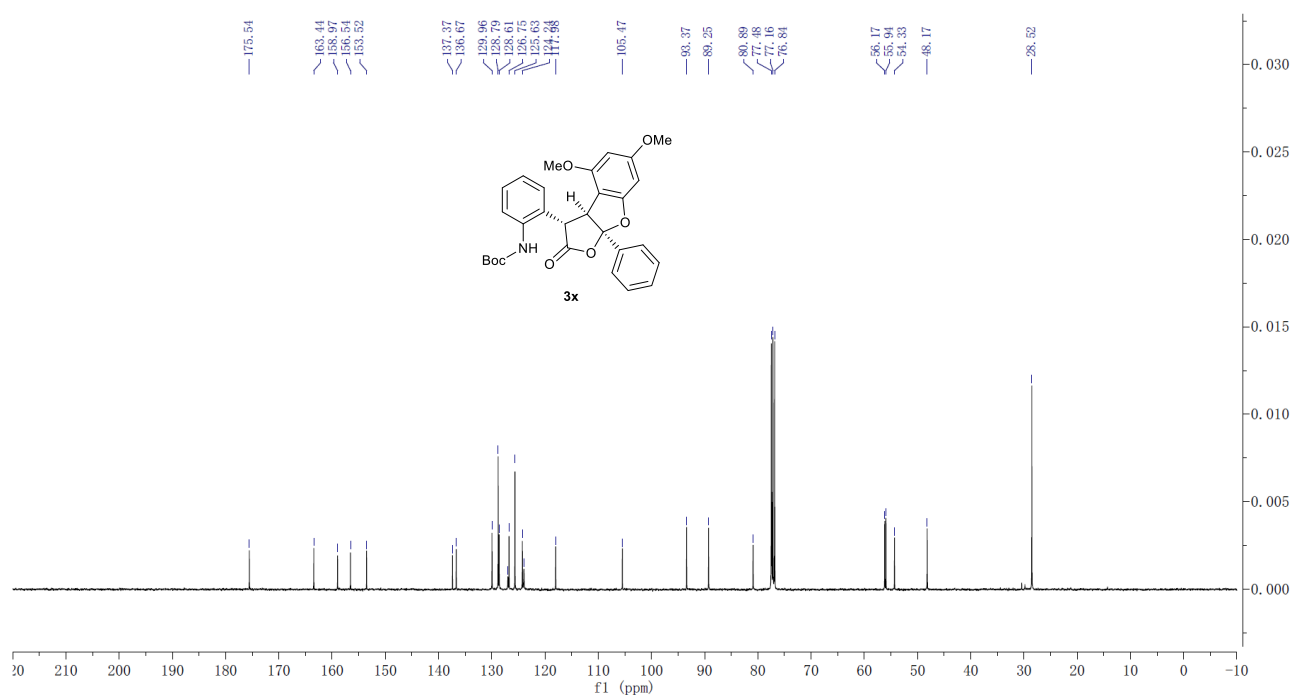

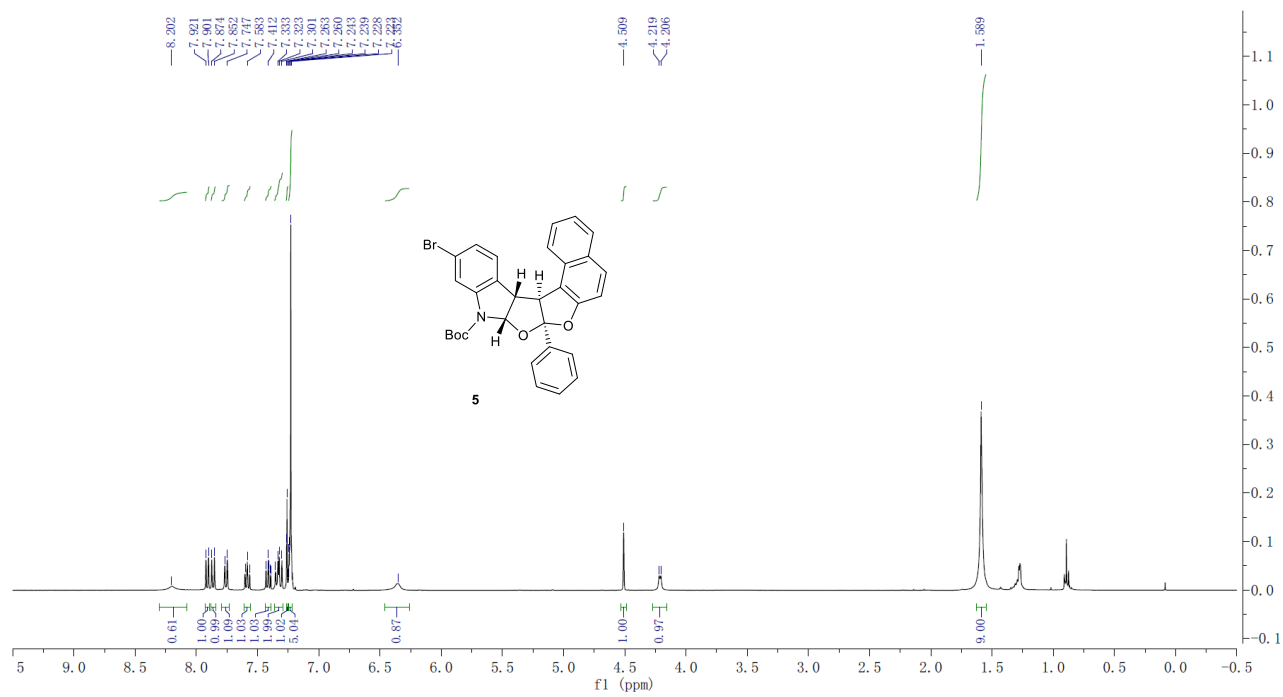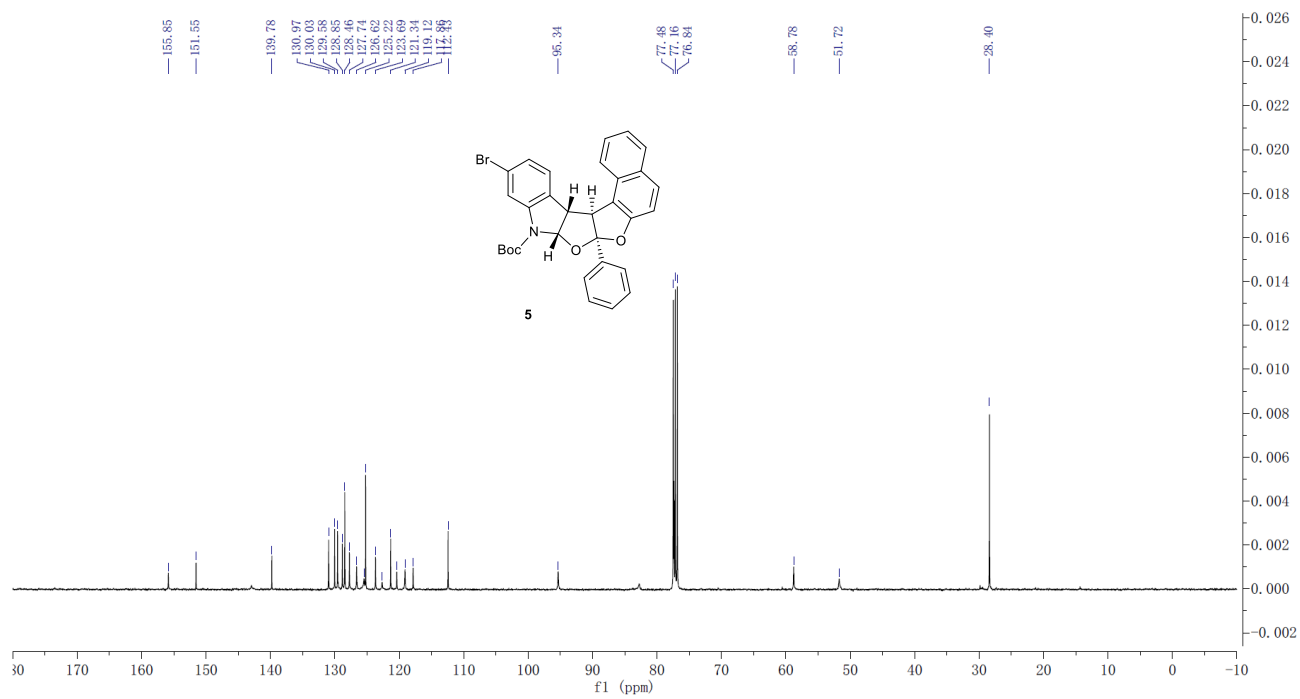

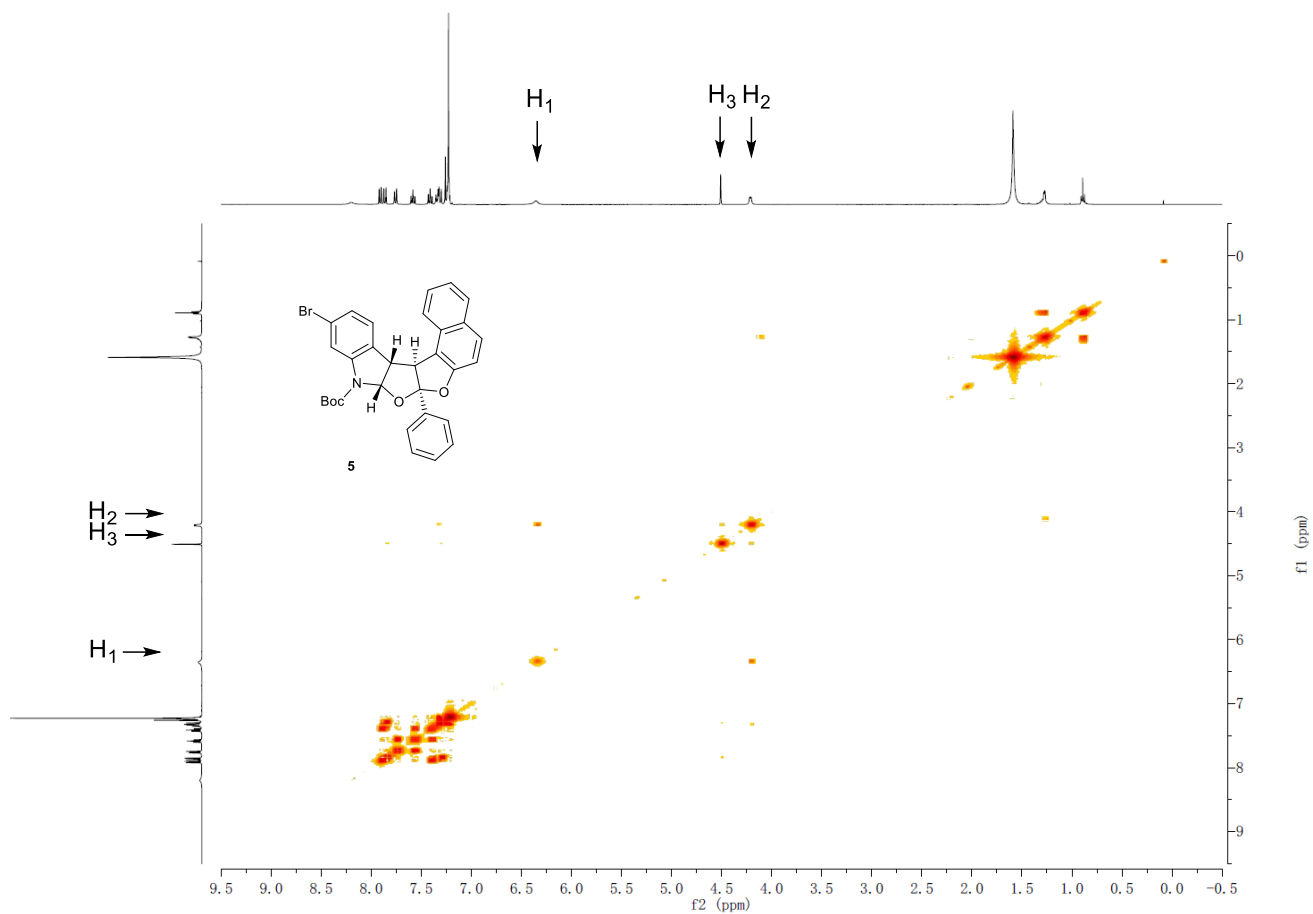

FigureS1. 2D-COSY Spectrum and Structure Assignment of Compound 6.



## 7. HPLC Chromatography

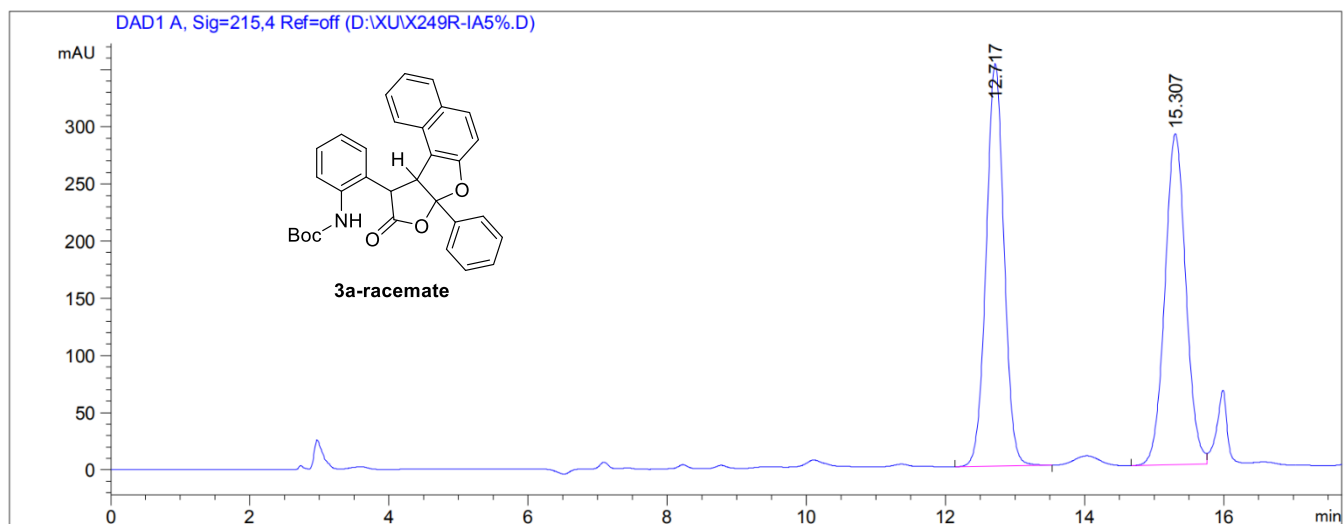

Signal 1: DAD1 A, Sig=215,4 Ref=off

| Peak # | RetTime [min] | Type | Width [min] | Area [mAU*s] | Height [mAU] | Area %  |
|--------|---------------|------|-------------|--------------|--------------|---------|
| 1      | 12.717        | BB   | 0.2760      | 6274.39502   | 351.89288    | 50.8810 |
| 2      | 15.307        | BV   | 0.3222      | 6057.12207   | 289.36621    | 49.1190 |

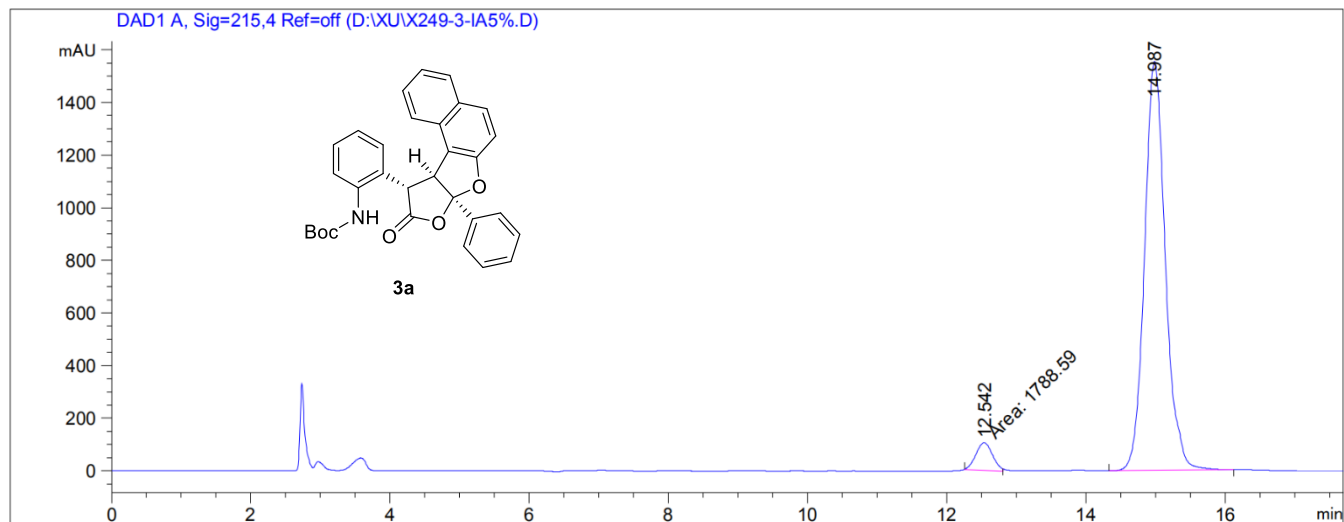

Signal 1: DAD1 A, Sig=215,4 Ref=off

| Peak # | RetTime [min] | Type | Width [min] | Area [mAU*s] | Height [mAU] | Area %  |
|--------|---------------|------|-------------|--------------|--------------|---------|
| 1      | 12.542        | MM   | 0.2799      | 1788.59106   | 106.49339    | 5.2539  |
| 2      | 14.987        | BB   | 0.3181      | 3.22548e4    | 1554.18201   | 94.7461 |

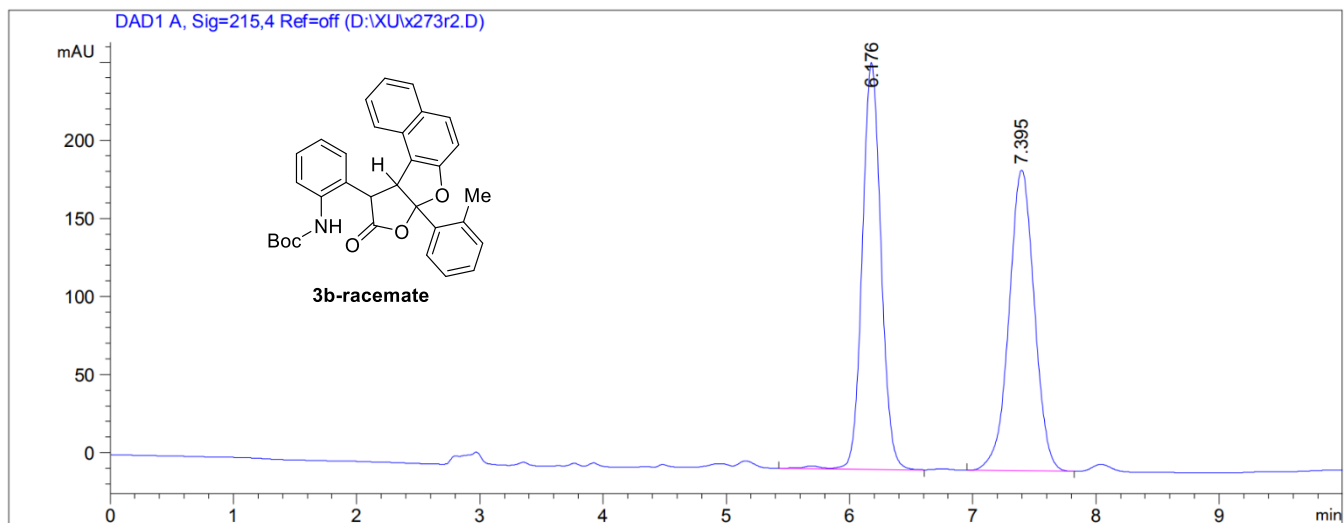

Signal 1: DAD1 A, Sig=215,4 Ref=off

| Peak # | RetTime [min] | Type | Width [min] | Area [mAU*s] | Height [mAU] | Area %  |
|--------|---------------|------|-------------|--------------|--------------|---------|
| 1      | 6.176         | VB R | 0.1624      | 2751.32153   | 260.57388    | 49.9351 |
| 2      | 7.395         | BB   | 0.2230      | 2758.47485   | 192.67719    | 50.0649 |

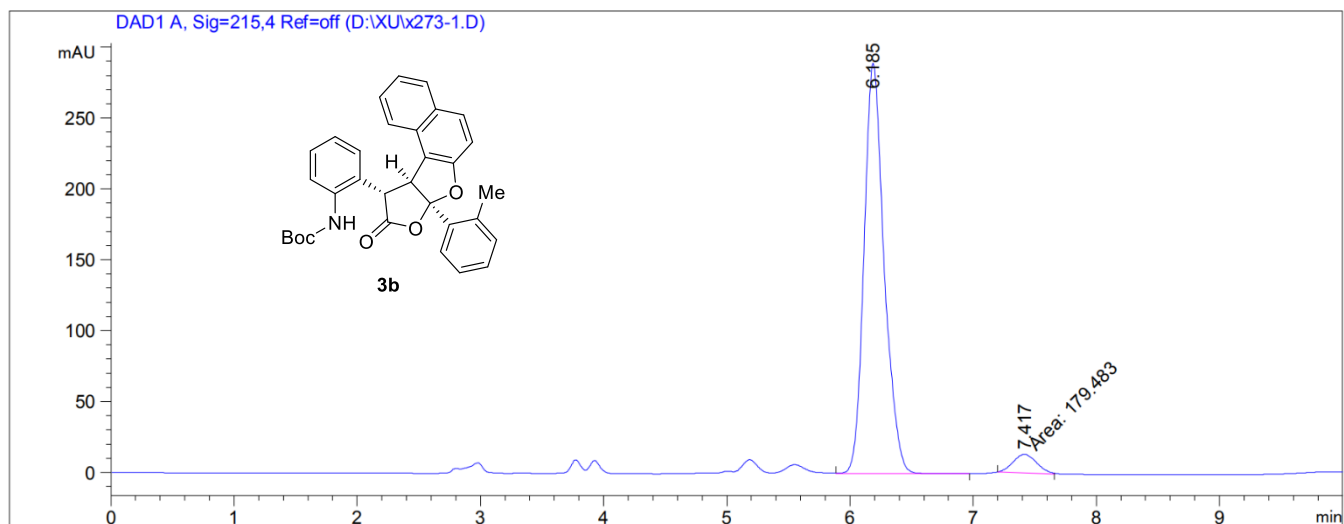

Signal 1: DAD1 A, Sig=215,4 Ref=off

| Peak # | RetTime [min] | Type | Width [min] | Area [mAU*s] | Height [mAU] | Area %  |
|--------|---------------|------|-------------|--------------|--------------|---------|
| 1      | 6.185         | VB   | 0.1722      | 3280.83032   | 289.44366    | 94.8131 |
| 2      | 7.417         | MM   | 0.2258      | 179.48282    | 13.24993     | 5.1869  |

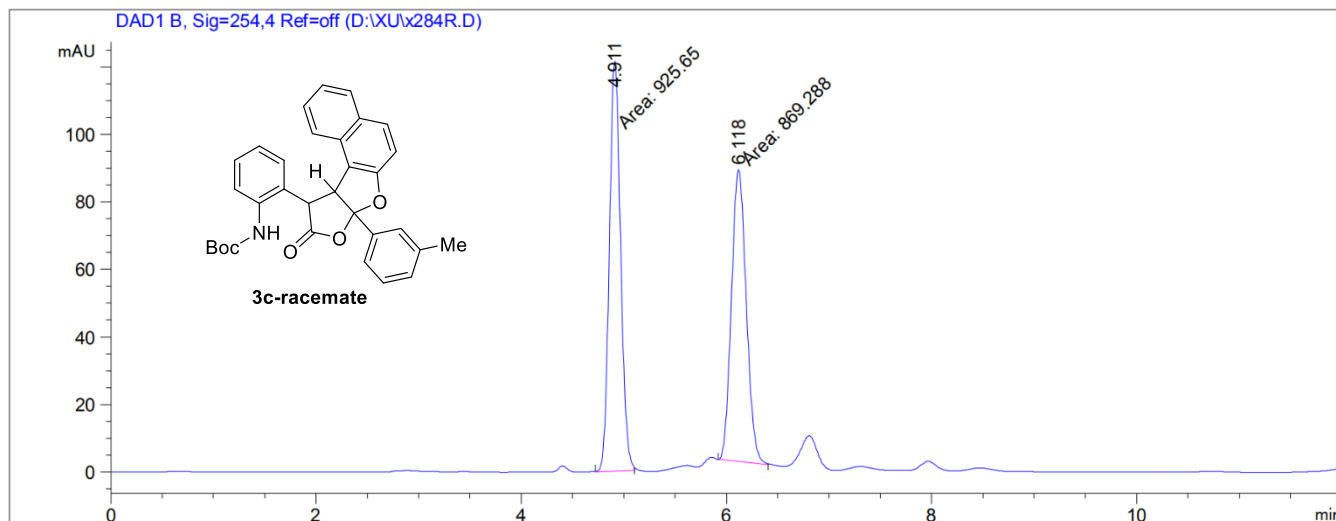

Signal 1: DAD1 B, Sig=254,4 Ref=off

| Peak # | RetTime [min] | Type | Width [min] | Area [mAU*s] | Height [mAU] | Area %  |
|--------|---------------|------|-------------|--------------|--------------|---------|
| 1      | 4.911         | MM   | 0.1269      | 925.64954    | 121.53663    | 51.5700 |
| 2      | 6.118         | MM   | 0.1676      | 869.28821    | 86.46539     | 48.4300 |

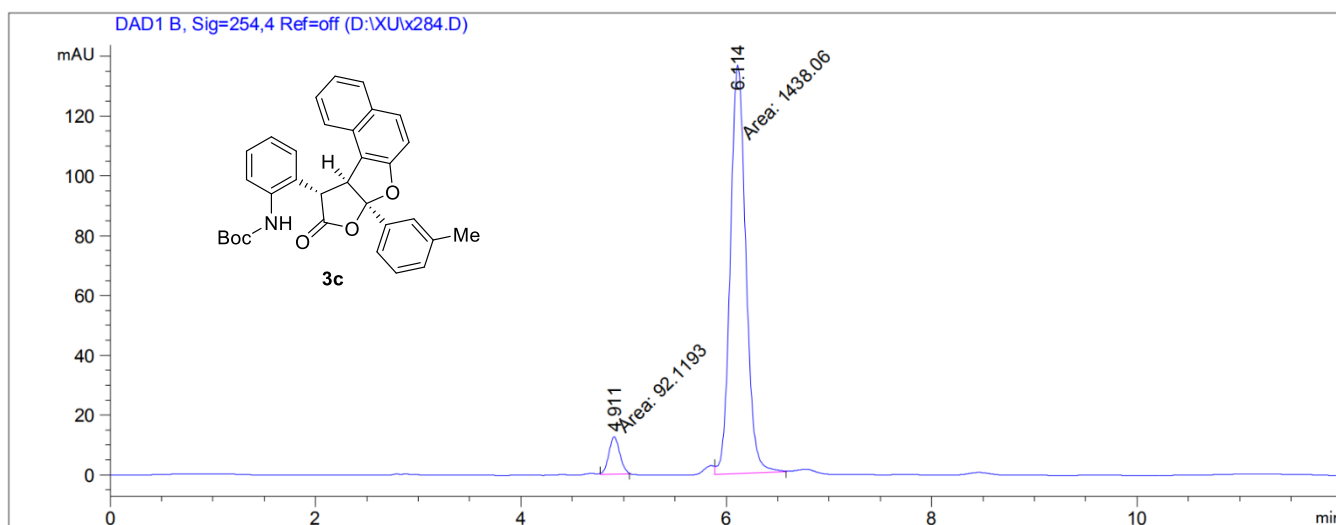

Signal 1: DAD1 B, Sig=254,4 Ref=off

| Peak # | RetTime [min] | Type | Width [min] | Area [mAU*s] | Height [mAU] | Area %  |
|--------|---------------|------|-------------|--------------|--------------|---------|
| 1      | 4.911         | MM   | 0.1233      | 92.11935     | 12.45011     | 6.0202  |
| 2      | 6.114         | FM   | 0.1753      | 1438.05725   | 136.70586    | 93.9798 |

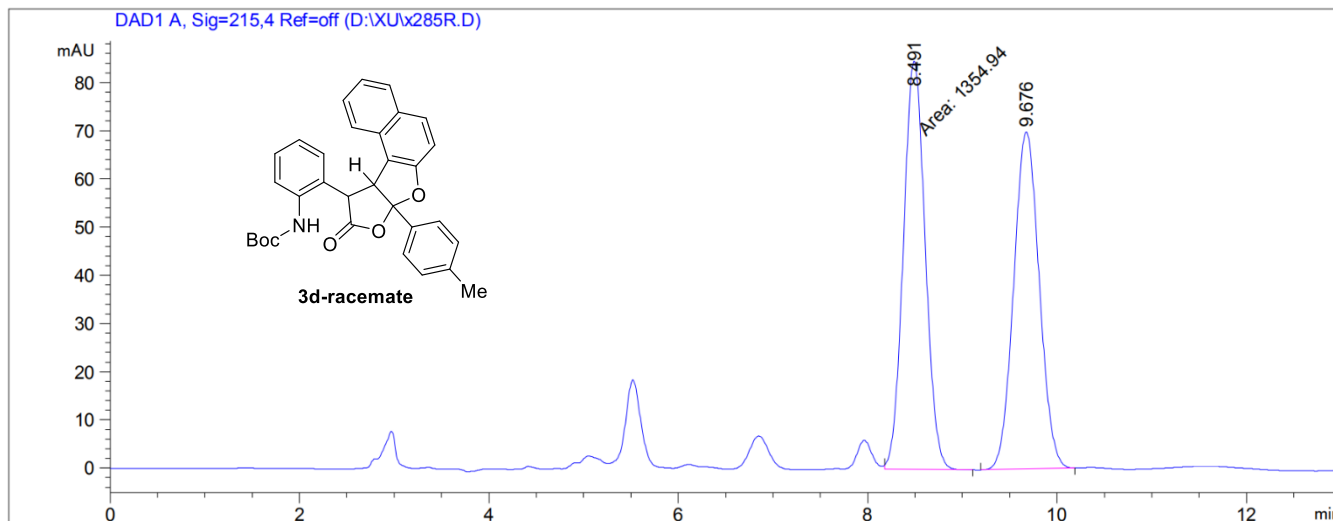

Signal 1: DAD1 A, Sig=215,4 Ref=off

| Peak # | RetTime [min] | Type | Width [min] | Area [mAU*s] | Height [mAU] | Area %  |
|--------|---------------|------|-------------|--------------|--------------|---------|
| 1      | 8.491         | FM   | 0.2665      | 1354.94287   | 84.73129     | 50.8384 |
| 2      | 9.676         | BB   | 0.2924      | 1310.25220   | 69.97993     | 49.1616 |

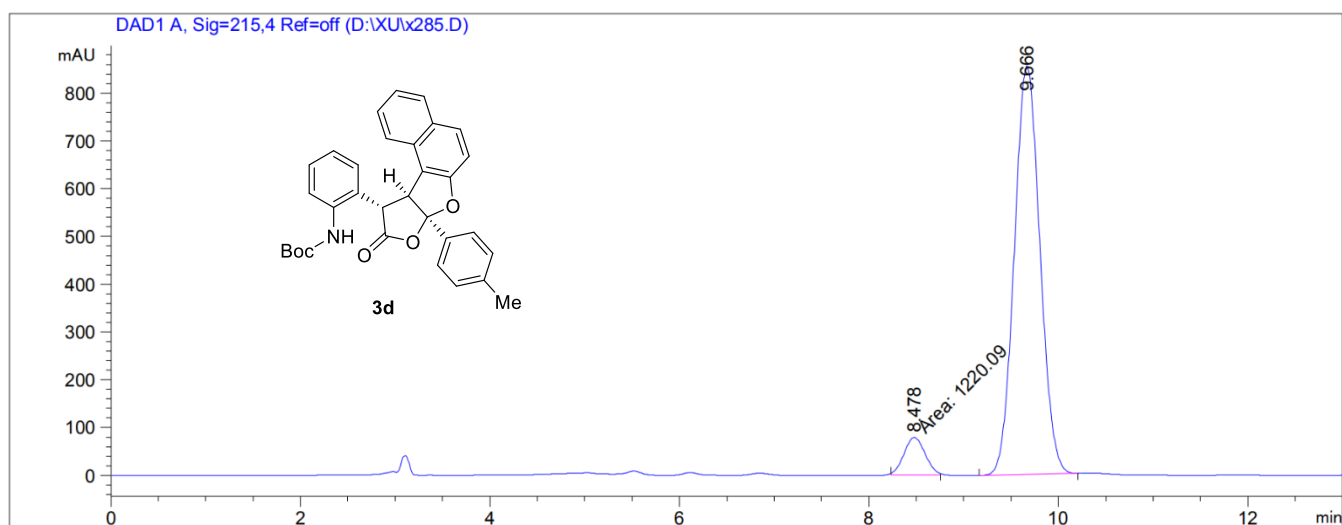

Signal 1: DAD1 A, Sig=215,4 Ref=off

| Peak # | RetTime [min] | Type | Width [min] | Area [mAU*s] | Height [mAU] | Area %  |
|--------|---------------|------|-------------|--------------|--------------|---------|
| 1      | 8.478         | MM   | 0.2581      | 1220.09192   | 78.78511     | 7.0683  |
| 2      | 9.666         | BB   | 0.2928      | 1.60414e4    | 855.25653    | 92.9317 |

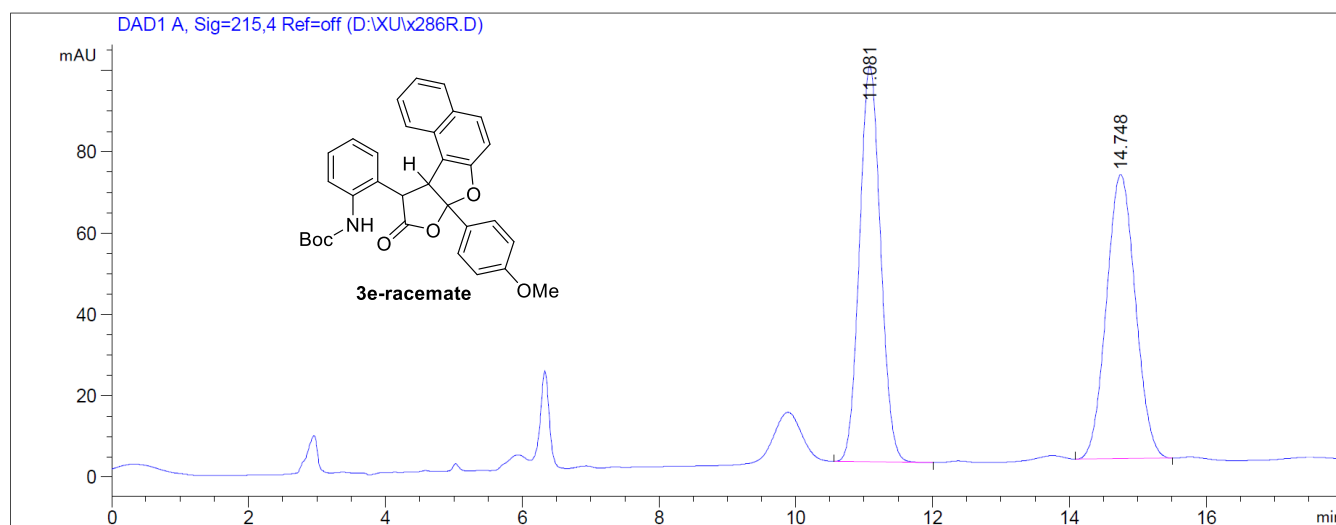

Signal 1: DAD1 A, Sig=215,4 Ref=off

| Peak # | RetTime [min] | Type | Width [min] | Area [mAU*s] | Height [mAU] | Area %  |
|--------|---------------|------|-------------|--------------|--------------|---------|
| 1      | 11.081        | BB   | 0.3335      | 2083.72070   | 97.43663     | 50.3213 |
| 2      | 14.748        | BB   | 0.4616      | 2057.11011   | 69.83942     | 49.6787 |

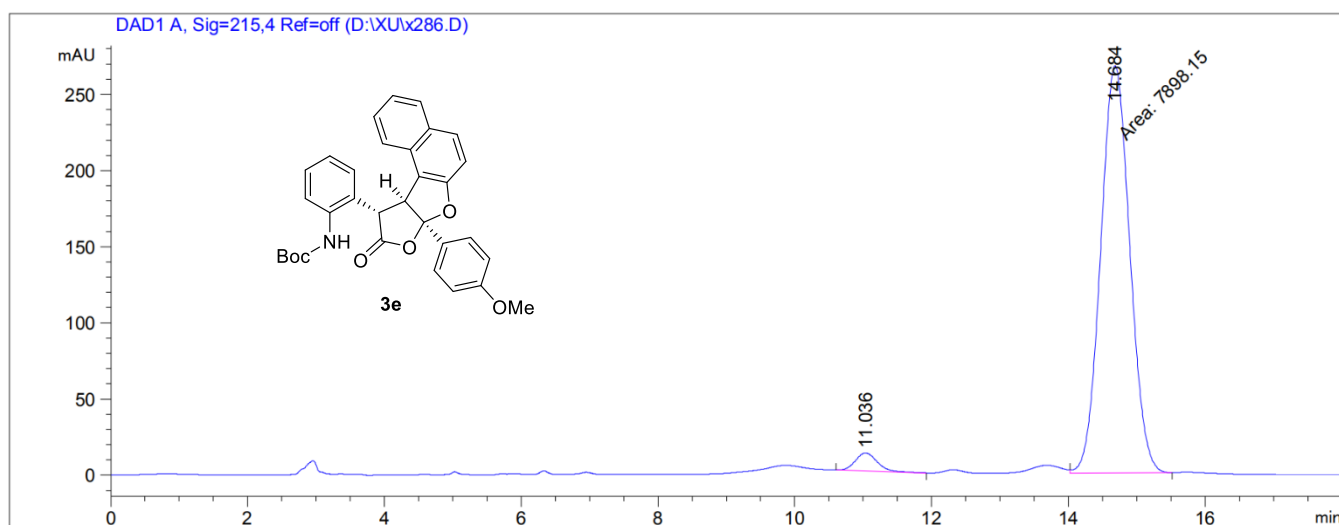

Signal 1: DAD1 A, Sig=215,4 Ref=off

| Peak # | RetTime [min] | Type | Width [min] | Area [mAU*s] | Height [mAU] | Area %  |
|--------|---------------|------|-------------|--------------|--------------|---------|
| 1      | 11.036        | BB   | 0.3409      | 263.31558    | 11.86439     | 3.2263  |
| 2      | 14.684        | FM   | 0.4925      | 7898.15088   | 267.29187    | 96.7737 |

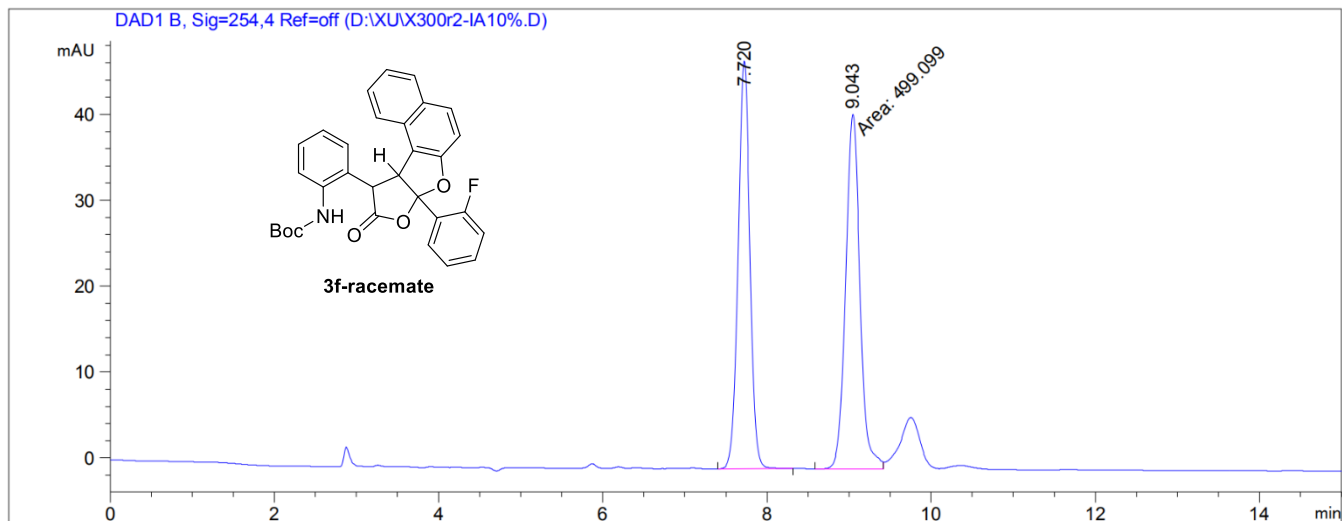

Signal 1: DAD1 B, Sig=254,4 Ref=off

| Peak # | RetTime [min] | Type | Width [min] | Area [mAU*s] | Height [mAU] | Area %  |
|--------|---------------|------|-------------|--------------|--------------|---------|
| 1      | 7.720         | BB   | 0.1542      | 472.86539    | 47.48503     | 48.6505 |
| 2      | 9.043         | MF   | 0.2014      | 499.09872    | 41.30740     | 51.3495 |

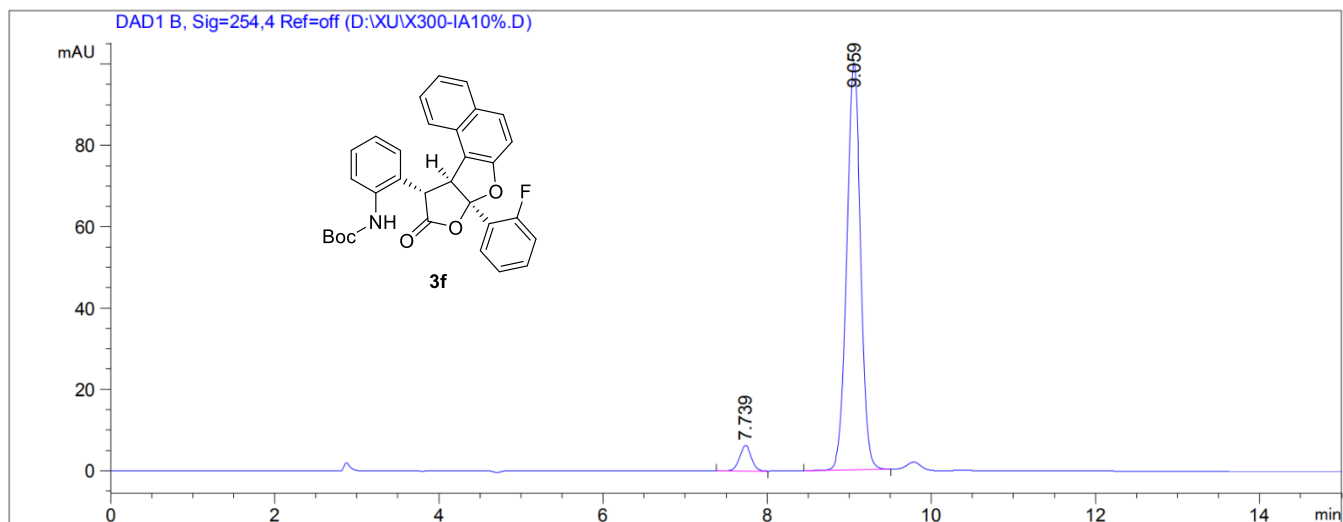

Signal 1: DAD1 B, Sig=254,4 Ref=off

| Peak # | RetTime [min] | Type | Width [min] | Area [mAU*s] | Height [mAU] | Area %  |
|--------|---------------|------|-------------|--------------|--------------|---------|
| 1      | 7.739         | BB   | 0.1523      | 62.84294     | 6.30304      | 5.0704  |
| 2      | 9.059         | BB   | 0.1810      | 1176.55383   | 100.18233    | 94.9296 |

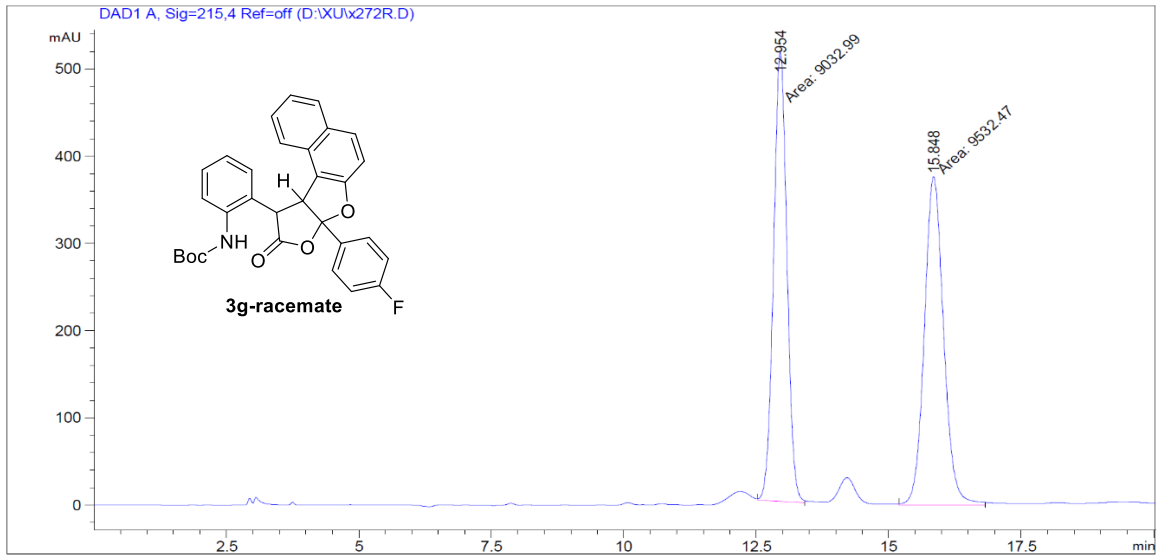

Signal 1: DAD1 A, Sig=215,4 Ref=off

| Peak # | RetTime [min] | Type | Width [min] | Area [mAU*s] | Height [mAU] | Area %  |
|--------|---------------|------|-------------|--------------|--------------|---------|
| 1      | 12.954        | MM   | 0.2925      | 9032.99219   | 514.65948    | 48.6548 |
| 2      | 15.848        | MM   | 0.4220      | 9532.47070   | 376.46310    | 51.3452 |

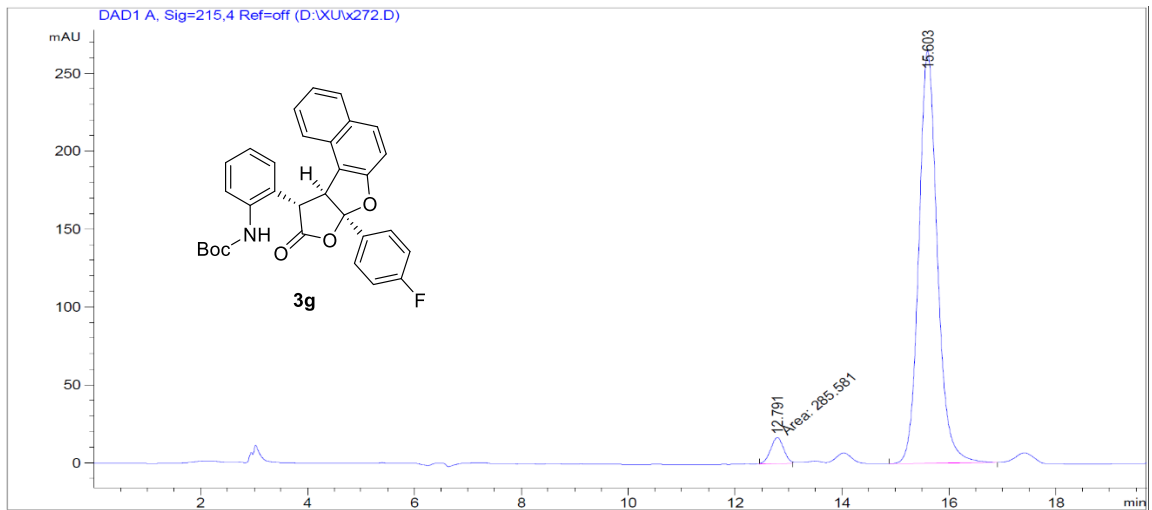

Signal 1: DAD1 A, Sig=215,4 Ref=off

| Peak # | RetTime [min] | Type | Width [min] | Area [mAU*s] | Height [mAU] | Area %  |
|--------|---------------|------|-------------|--------------|--------------|---------|
| 1      | 12.791        | MM   | 0.2846      | 285.58087    | 16.72608     | 4.2898  |
| 2      | 15.603        | BB   | 0.3667      | 6371.60938   | 264.79294    | 95.7102 |

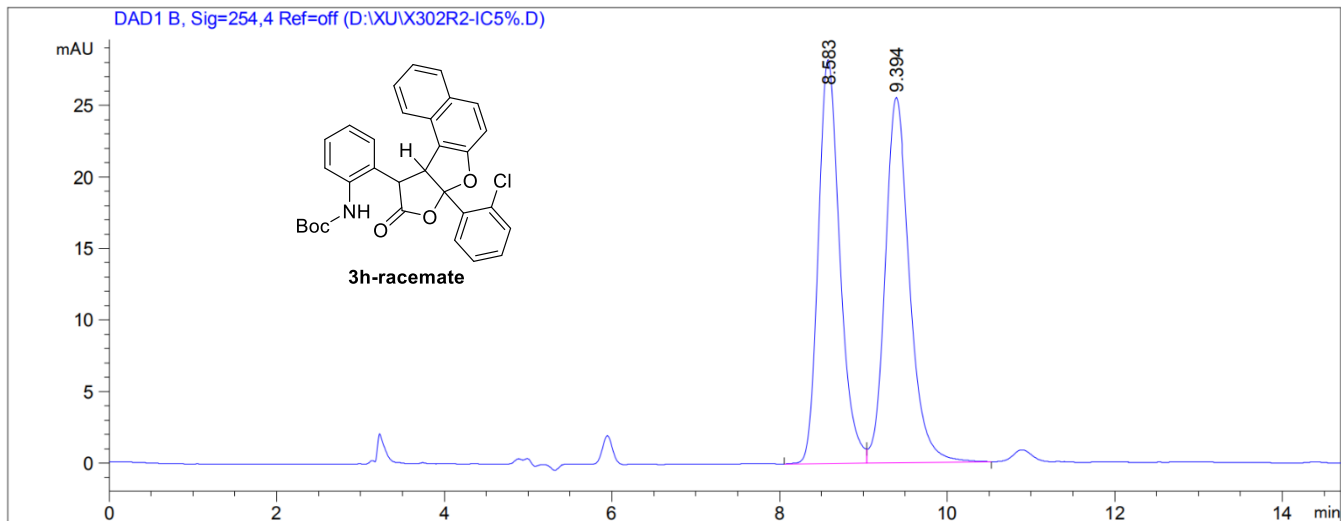

Signal 1: DAD1 B, Sig=254,4 Ref=off

| Peak # | RetTime [min] | Type | Width [min] | Area [mAU*s] | Height [mAU] | Area %  |
|--------|---------------|------|-------------|--------------|--------------|---------|
| 1      | 8.583         | BV   | 0.2735      | 501.85040    | 28.21617     | 49.1208 |
| 2      | 9.394         | VB   | 0.3095      | 519.81628    | 25.53336     | 50.8792 |

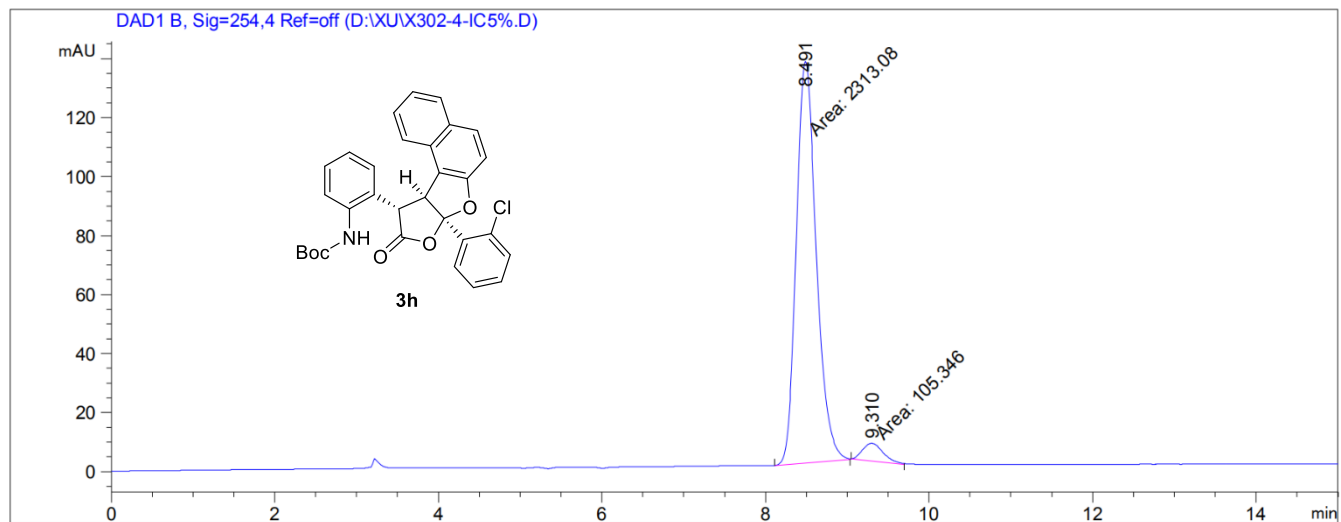

Signal 1: DAD1 B, Sig=254,4 Ref=off

| Peak # | RetTime [min] | Type | Width [min] | Area [mAU*s] | Height [mAU] | Area %  |
|--------|---------------|------|-------------|--------------|--------------|---------|
| 1      | 8.491         | MM   | 0.2831      | 2313.07520   | 136.15459    | 95.6440 |
| 2      | 9.310         | MM   | 0.2932      | 105.34649    | 5.98878      | 4.3560  |



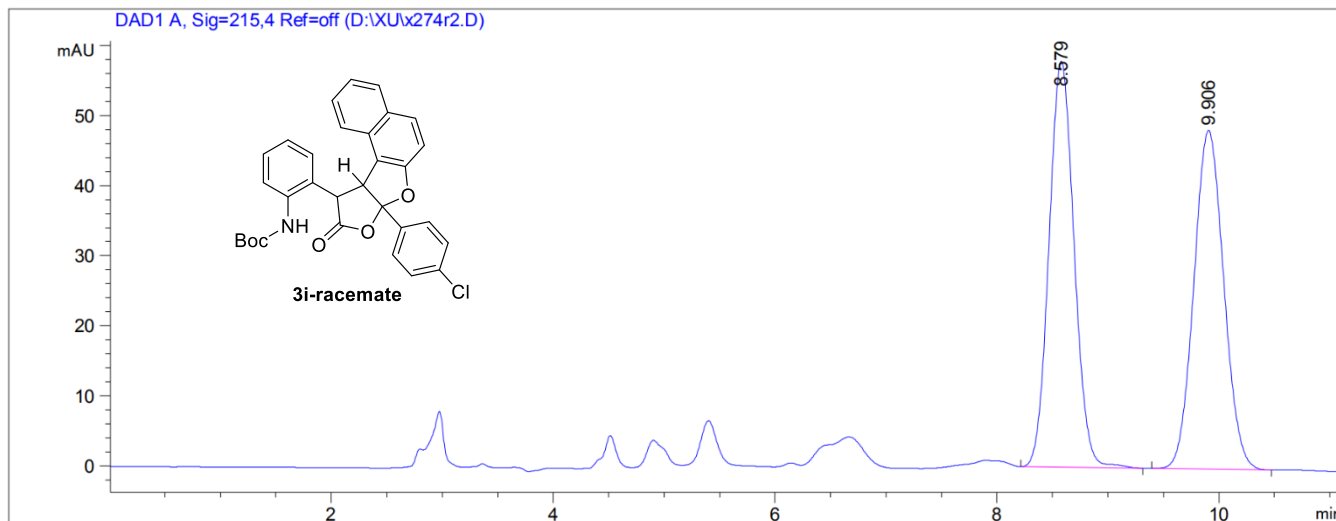

Signal 1: DAD1 A, Sig=215,4 Ref=off

| Peak # | RetTime [min] | Type | Width [min] | Area [mAU*s] | Height [mAU] | Area %  |
|--------|---------------|------|-------------|--------------|--------------|---------|
| 1      | 8.579         | BB   | 0.2453      | 909.79633    | 57.89734     | 50.1795 |
| 2      | 9.906         | BB   | 0.2923      | 903.28693    | 48.28510     | 49.8205 |

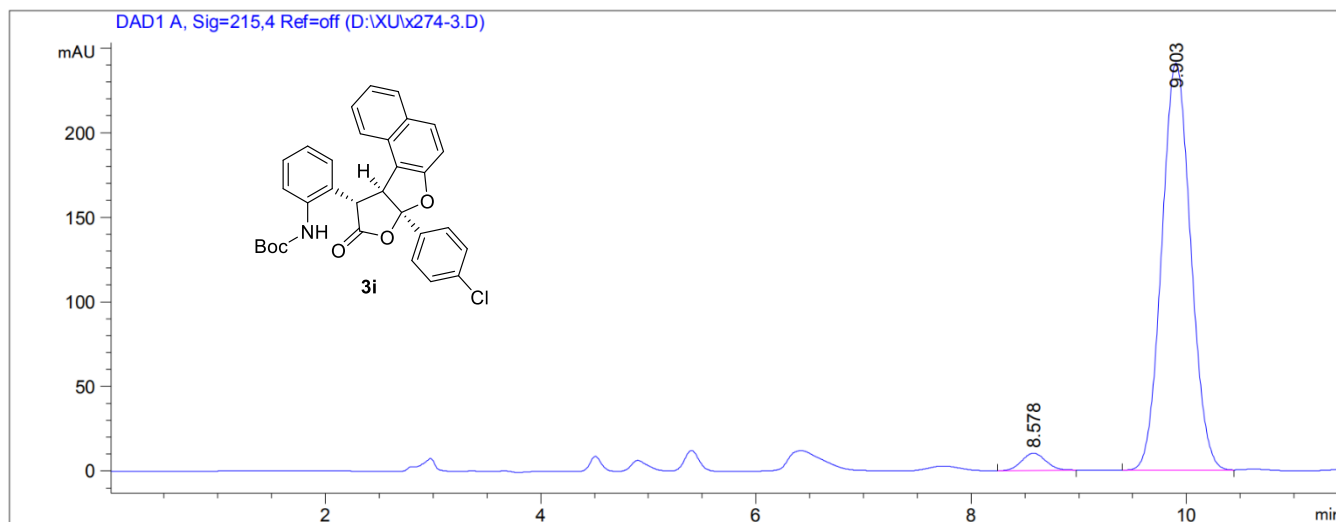

Signal 1: DAD1 A, Sig=215,4 Ref=off

| Peak # | RetTime [min] | Type | Width [min] | Area [mAU*s] | Height [mAU] | Area %  |
|--------|---------------|------|-------------|--------------|--------------|---------|
| 1      | 8.578         | BB   | 0.2415      | 156.89336    | 10.19465     | 3.3726  |
| 2      | 9.903         | BB   | 0.2919      | 4495.16113   | 240.64717    | 96.6274 |

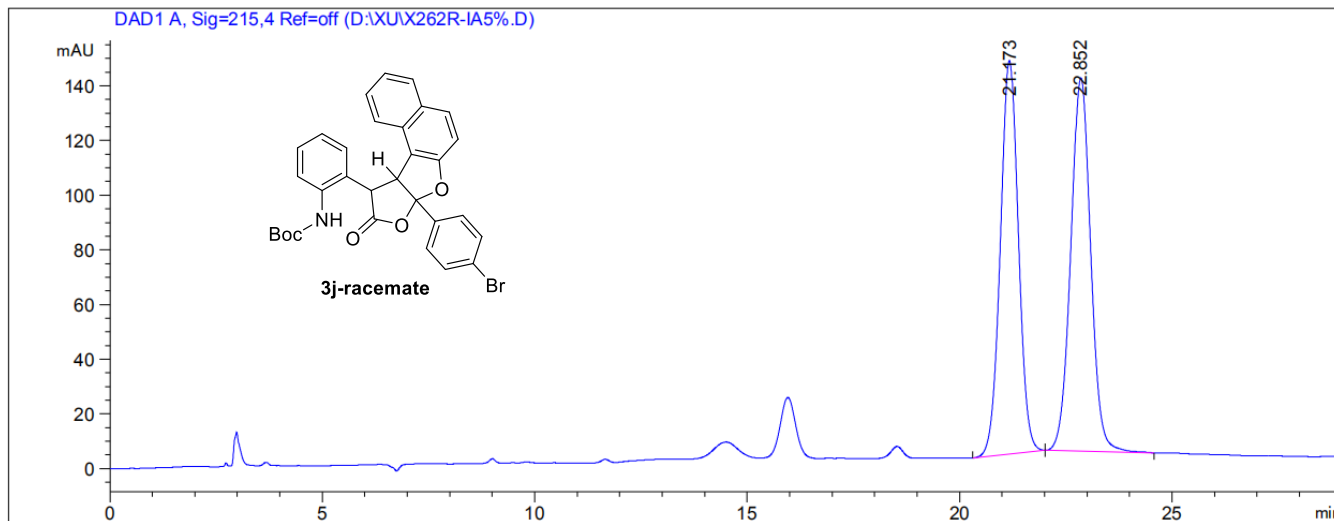

Signal 1: DAD1 A, Sig=215,4 Ref=off

| Peak # | RetTime [min] | Type | Width [min] | Area [mAU*s] | Height [mAU] | Area %  |
|--------|---------------|------|-------------|--------------|--------------|---------|
| 1      | 21.173        | BB   | 0.4562      | 4246.44043   | 143.95065    | 48.8052 |
| 2      | 22.852        | BB   | 0.5027      | 4454.34717   | 136.52254    | 51.1948 |

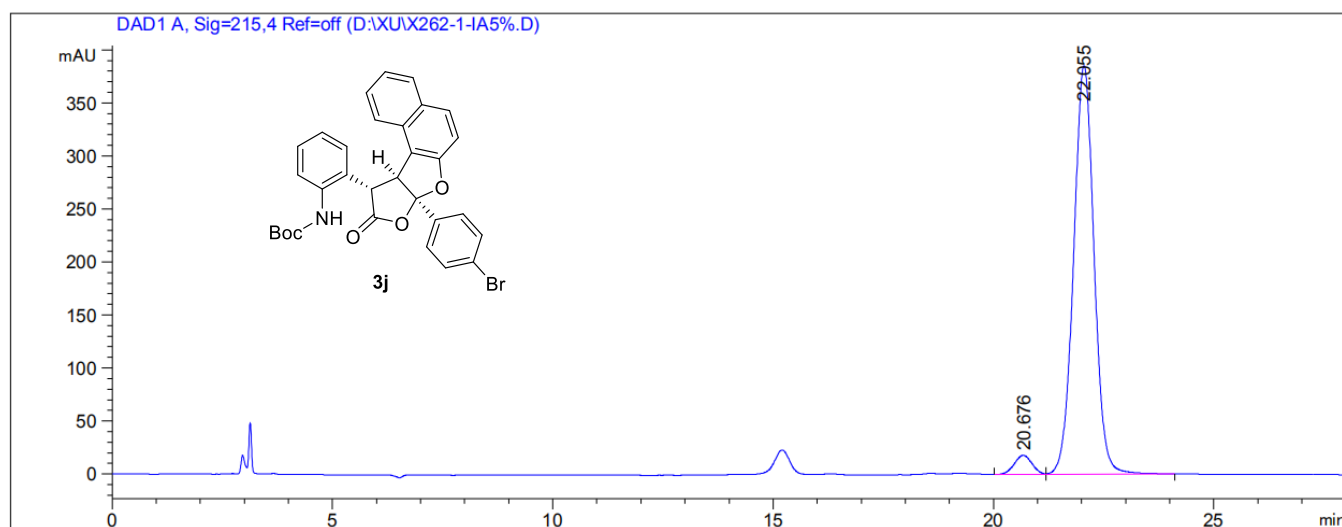

Signal 1: DAD1 A, Sig=215,4 Ref=off

| Peak # | RetTime [min] | Type | Width [min] | Area [mAU*s] | Height [mAU] | Area %  |
|--------|---------------|------|-------------|--------------|--------------|---------|
| 1      | 20.676        | BV   | 0.4346      | 505.26483    | 18.05069     | 3.9048  |
| 2      | 22.055        | VB   | 0.4966      | 1.24343e4    | 385.18887    | 96.0952 |

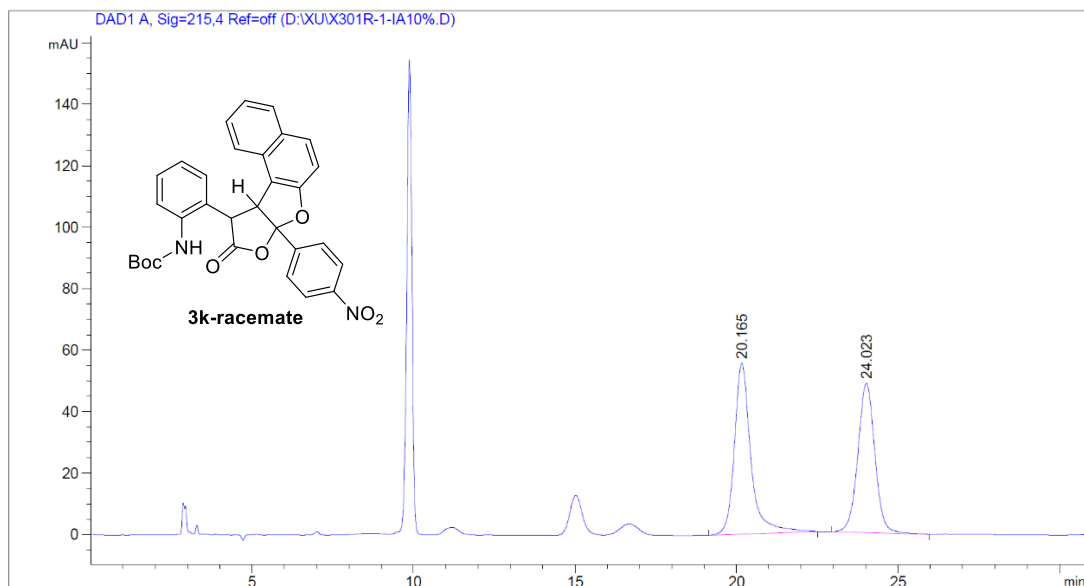

Signal 1: DAD1 A, Sig=215,4 Ref=off

| Peak # | RetTime [min] | Type | Width [min] | Area [mAU*s] | Height [mAU] | Area %  |
|--------|---------------|------|-------------|--------------|--------------|---------|
| 1      | 20.165        | BB   | 0.5291      | 1977.18372   | 55.57030     | 52.5678 |
| 2      | 24.023        | BB   | 0.5614      | 1784.02515   | 48.69760     | 47.4322 |

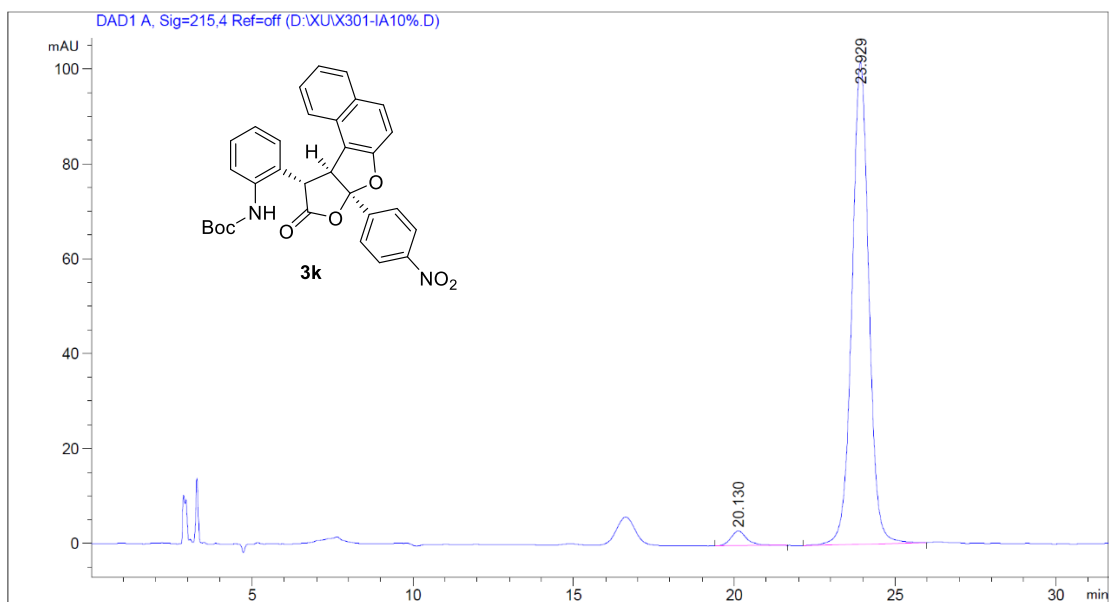

Signal 1: DAD1 A, Sig=215,4 Ref=off

| Peak # | RetTime [min] | Type | Width [min] | Area [mAU*s] | Height [mAU] | Area %  |
|--------|---------------|------|-------------|--------------|--------------|---------|
| 1      | 20.130        | BB   | 0.5169      | 107.70631    | 3.07326      | 2.8198  |
| 2      | 23.929        | BB   | 0.5606      | 3711.88062   | 101.50512    | 97.1802 |

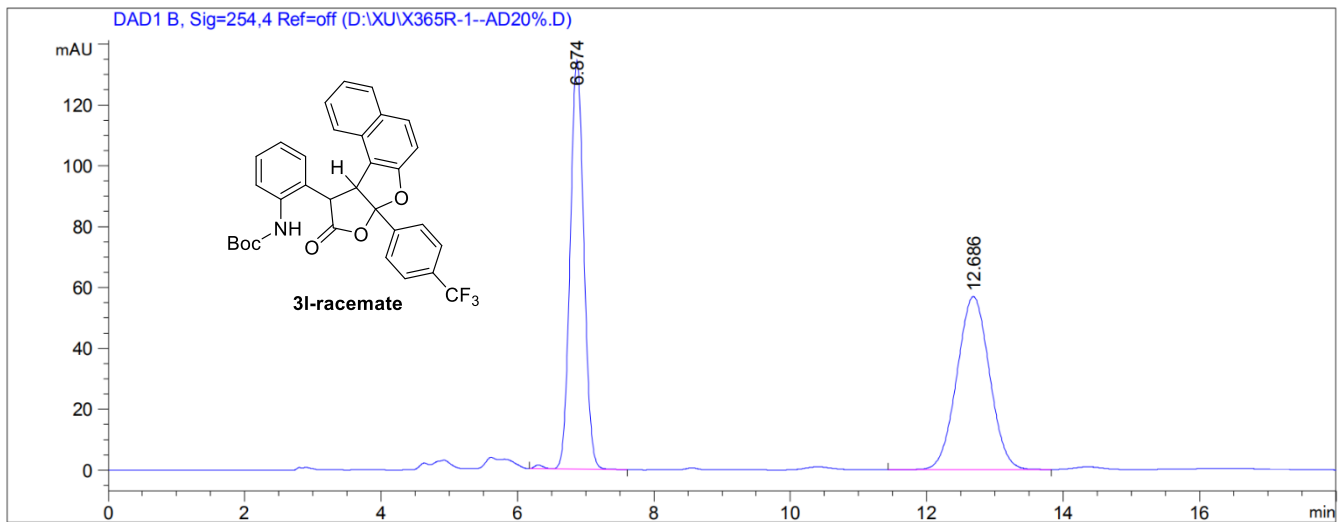

Signal 1: DAD1 B, Sig=254,4 Ref=off

| Peak # | RetTime [min] | Type | Width [min] | Area [mAU*s] | Height [mAU] | Area %  |
|--------|---------------|------|-------------|--------------|--------------|---------|
| 1      | 6.874         | VB R | 0.2190      | 1889.25354   | 134.41695    | 50.0400 |
| 2      | 12.686        | BB   | 0.5192      | 1886.23059   | 56.84082     | 49.9600 |

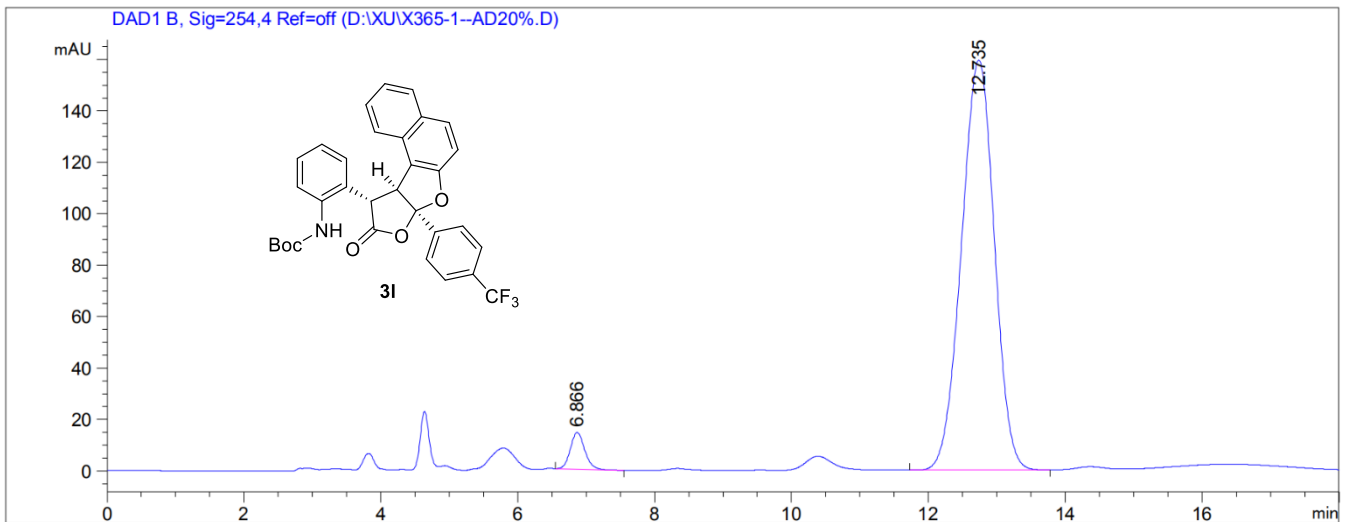

Signal 1: DAD1 B, Sig=254,4 Ref=off

| Peak # | RetTime [min] | Type | Width [min] | Area [mAU*s] | Height [mAU] | Area %  |
|--------|---------------|------|-------------|--------------|--------------|---------|
| 1      | 6.866         | BB   | 0.2242      | 208.71344    | 14.31035     | 3.7717  |
| 2      | 12.735        | BB   | 0.5216      | 5324.96777   | 159.45212    | 96.2283 |

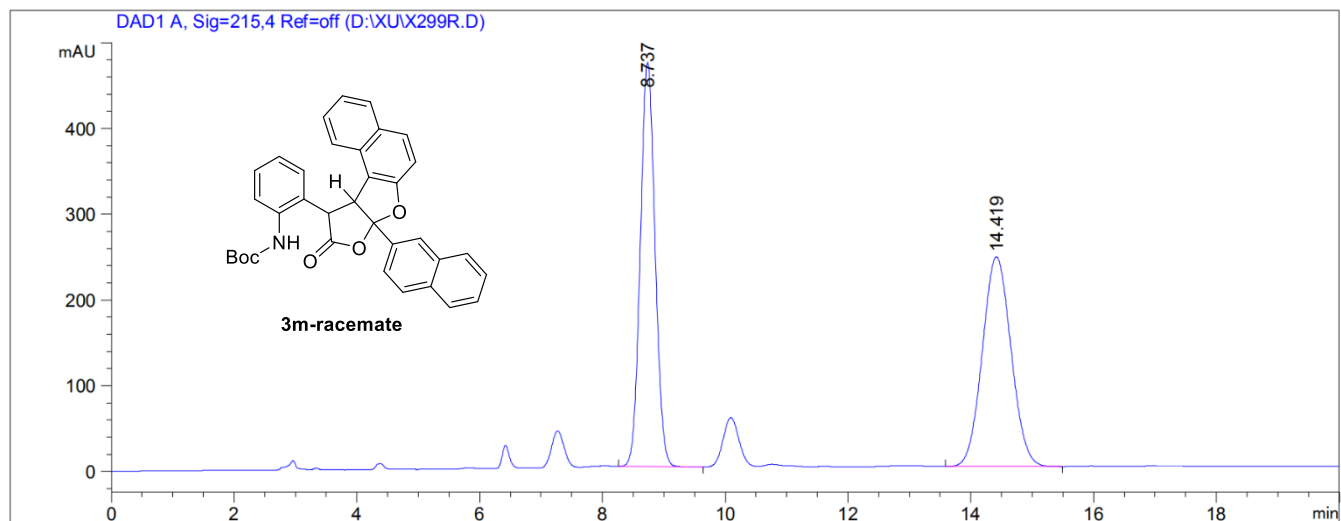

Signal 1: DAD1 A, Sig=215,4 Ref=off

| Peak # | RetTime [min] | Type | Width [min] | Area [mAU*s] | Height [mAU] | Area %  |
|--------|---------------|------|-------------|--------------|--------------|---------|
| 1      | 8.737         | BB   | 0.2611      | 7878.32666   | 471.07153    | 49.7567 |
| 2      | 14.419        | BB   | 0.5073      | 7955.36572   | 244.67725    | 50.2433 |

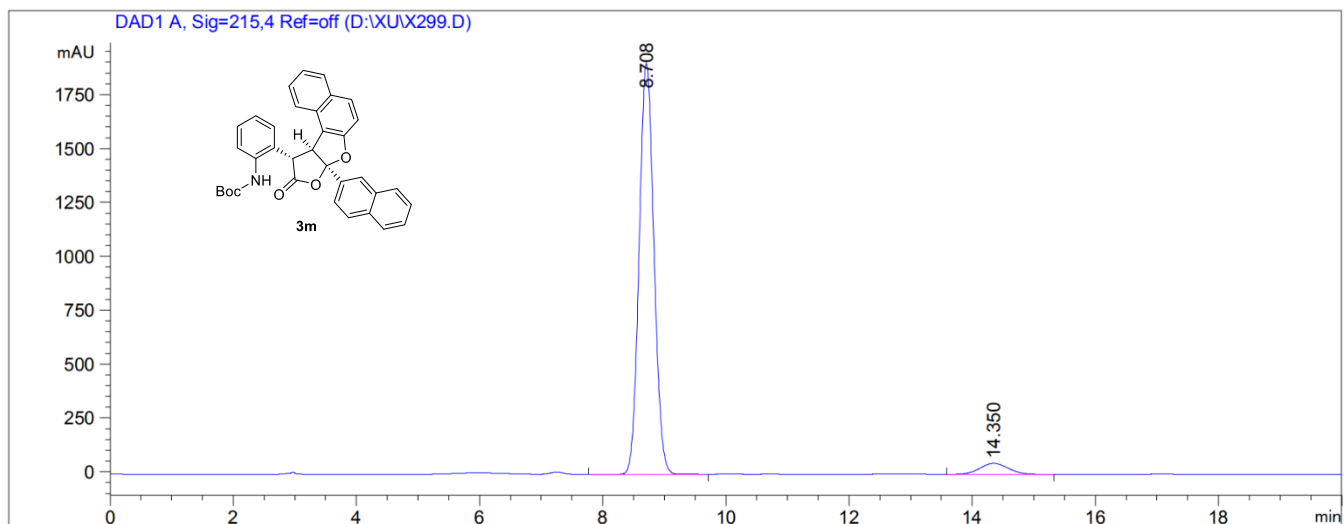

Signal 1: DAD1 A, Sig=215,4 Ref=off

| Peak # | RetTime [min] | Type | Width [min] | Area [mAU*s] | Height [mAU] | Area %  |
|--------|---------------|------|-------------|--------------|--------------|---------|
| 1      | 8.708         | BB   | 0.2603      | 3.17702e4    | 1907.70044   | 95.1626 |
| 2      | 14.350        | BB   | 0.5020      | 1614.97119   | 50.37462     | 4.8374  |

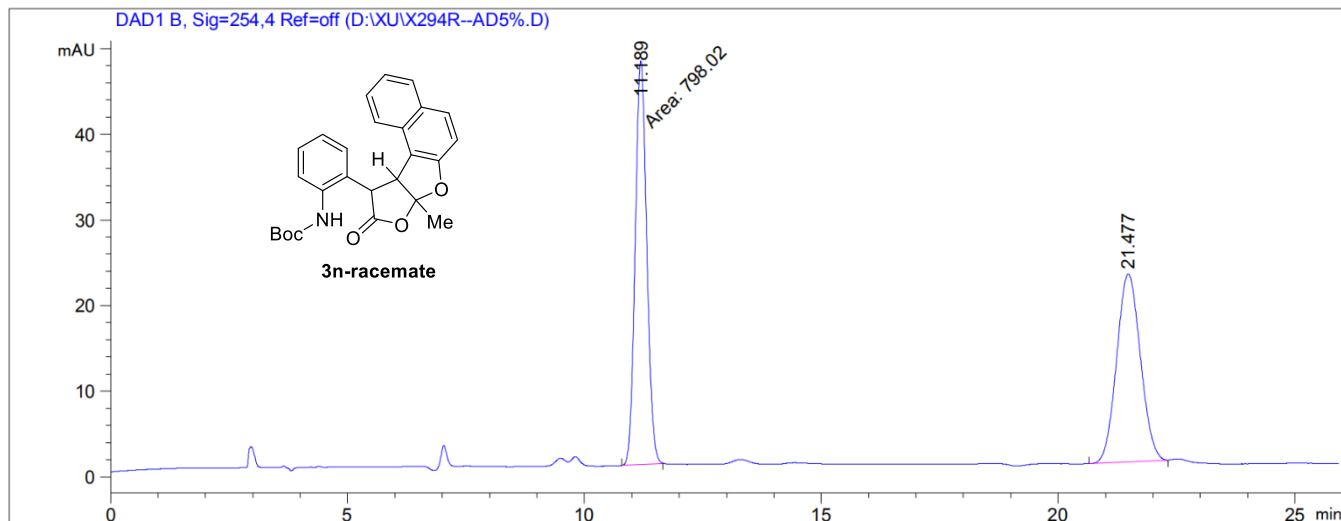

Signal 1: DAD1 B, Sig=254,4 Ref=off

| Peak # | RetTime [min] | Type | Width [min] | Area [mAU*s] | Height [mAU] | Area %  |
|--------|---------------|------|-------------|--------------|--------------|---------|
| 1      | 11.189        | MM   | 0.2821      | 798.01953    | 47.13942     | 51.0675 |
| 2      | 21.477        | BB   | 0.5425      | 764.65503    | 21.94746     | 48.9325 |

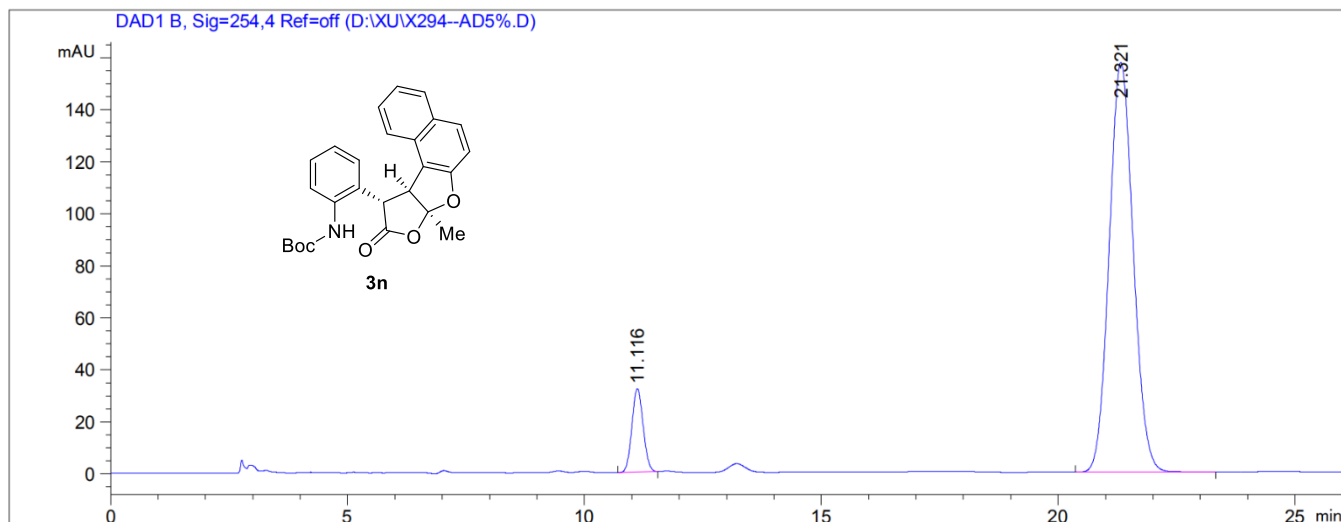

Signal 1: DAD1 B, Sig=254,4 Ref=off

| Peak # | RetTime [min] | Type | Width [min] | Area [mAU*s] | Height [mAU] | Area %  |
|--------|---------------|------|-------------|--------------|--------------|---------|
| 1      | 11.116        | BB   | 0.2563      | 529.87958    | 32.15114     | 8.7032  |
| 2      | 21.321        | BB   | 0.5474      | 5558.47461   | 157.63200    | 91.2968 |

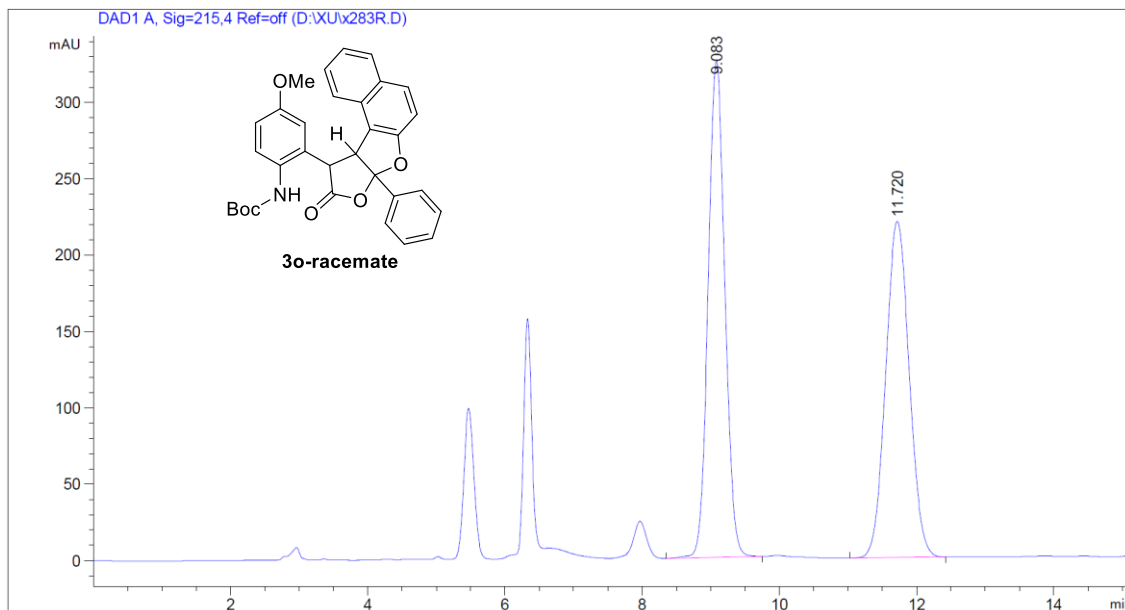

Signal 1: DAD1 A, Sig=215,4 Ref=off

| Peak # | RetTime [min] | Type | Width [min] | Area [mAU*s] | Height [mAU] | Area %  |
|--------|---------------|------|-------------|--------------|--------------|---------|
| 1      | 9.083         | BB   | 0.2631      | 5492.79834   | 325.18536    | 51.1945 |
| 2      | 11.720        | BB   | 0.3715      | 5236.48193   | 220.11279    | 48.8055 |

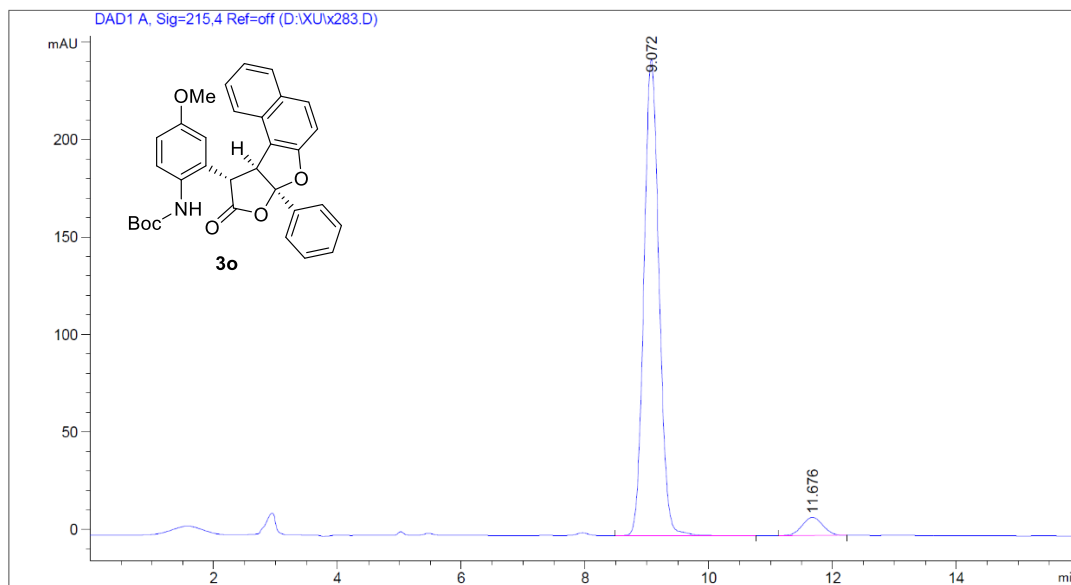

Signal 1: DAD1 A, Sig=215,4 Ref=off

| Peak # | RetTime [min] | Type | Width [min] | Area [mAU*s] | Height [mAU] | Area %  |
|--------|---------------|------|-------------|--------------|--------------|---------|
| 1      | 9.072         | BB   | 0.2636      | 4131.11865   | 243.94597    | 95.0116 |
| 2      | 11.676        | BB   | 0.3625      | 216.89424    | 9.28732      | 4.9884  |

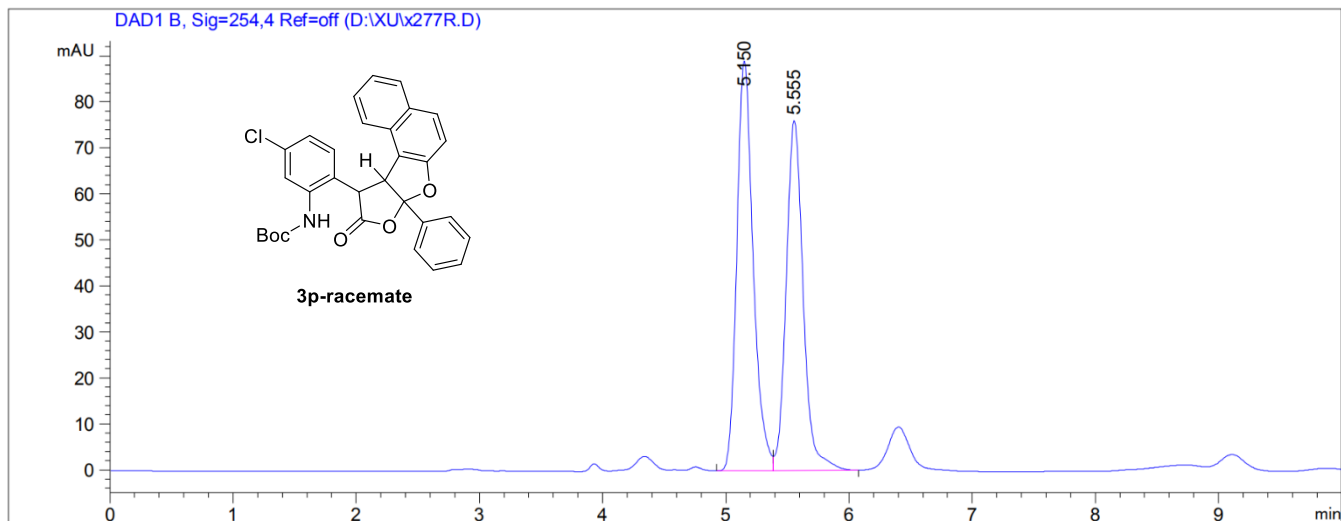

Signal 1: DAD1 B, Sig=254,4 Ref=off

| Peak # | RetTime [min] | Type | Width [min] | Area [mAU*s] | Height [mAU] | Area %  |
|--------|---------------|------|-------------|--------------|--------------|---------|
| 1      | 5.150         | BV   | 0.1395      | 821.45093    | 89.16396     | 52.9517 |
| 2      | 5.555         | VB   | 0.1479      | 729.87097    | 76.11176     | 47.0483 |

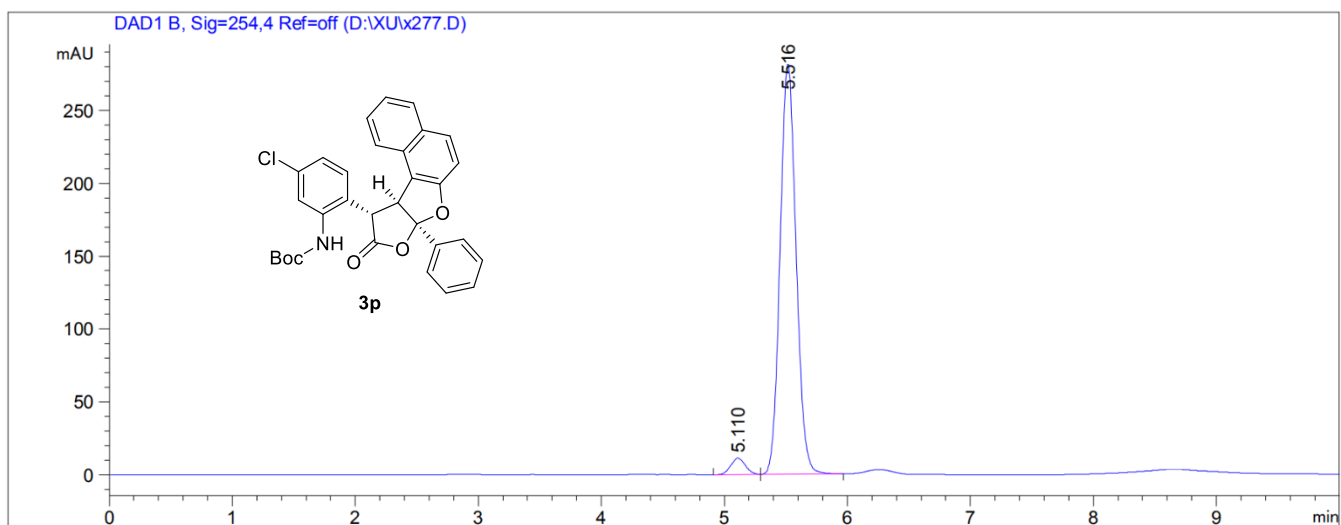

Signal 1: DAD1 B, Sig=254,4 Ref=off

| Peak # | RetTime [min] | Type | Width [min] | Area [mAU*s] | Height [mAU] | Area %  |
|--------|---------------|------|-------------|--------------|--------------|---------|
| 1      | 5.110         | BV   | 0.1284      | 92.30889     | 11.16994     | 3.5089  |
| 2      | 5.516         | VB   | 0.1412      | 2538.41528   | 281.45657    | 96.4911 |



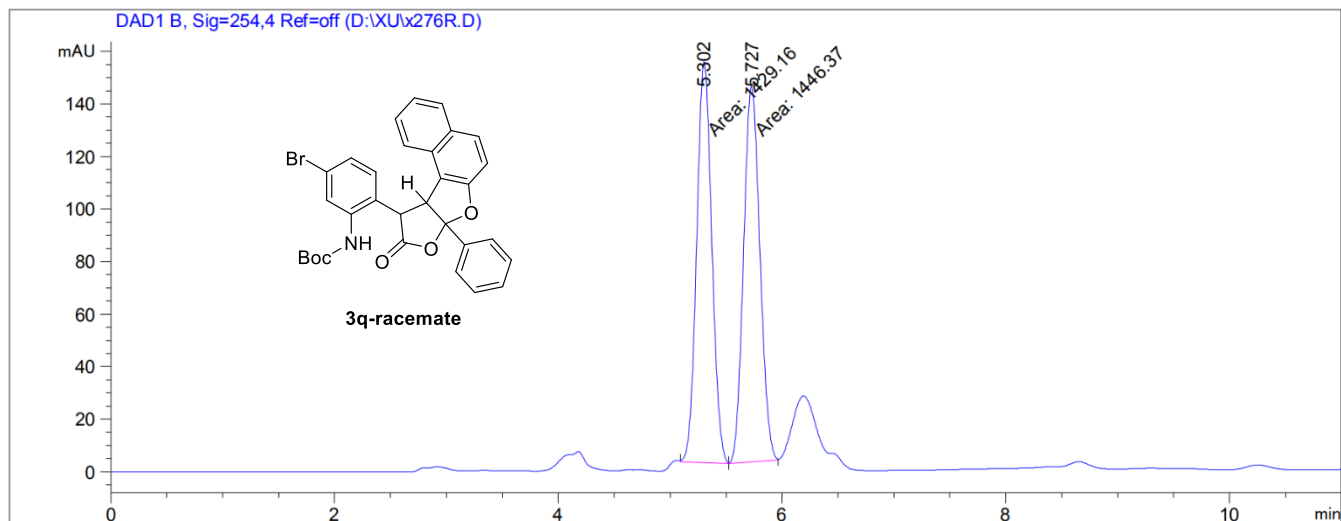

Signal 1: DAD1 B, Sig=254,4 Ref=off

| Peak # | RetTime [min] | Type | Width [min] | Area [mAU*s] | Height [mAU] | Area %  |
|--------|---------------|------|-------------|--------------|--------------|---------|
| 1      | 5.302         | MM   | 0.1559      | 1429.16223   | 152.74222    | 49.7007 |
| 2      | 5.727         | MM   | 0.1683      | 1446.37231   | 143.19722    | 50.2993 |

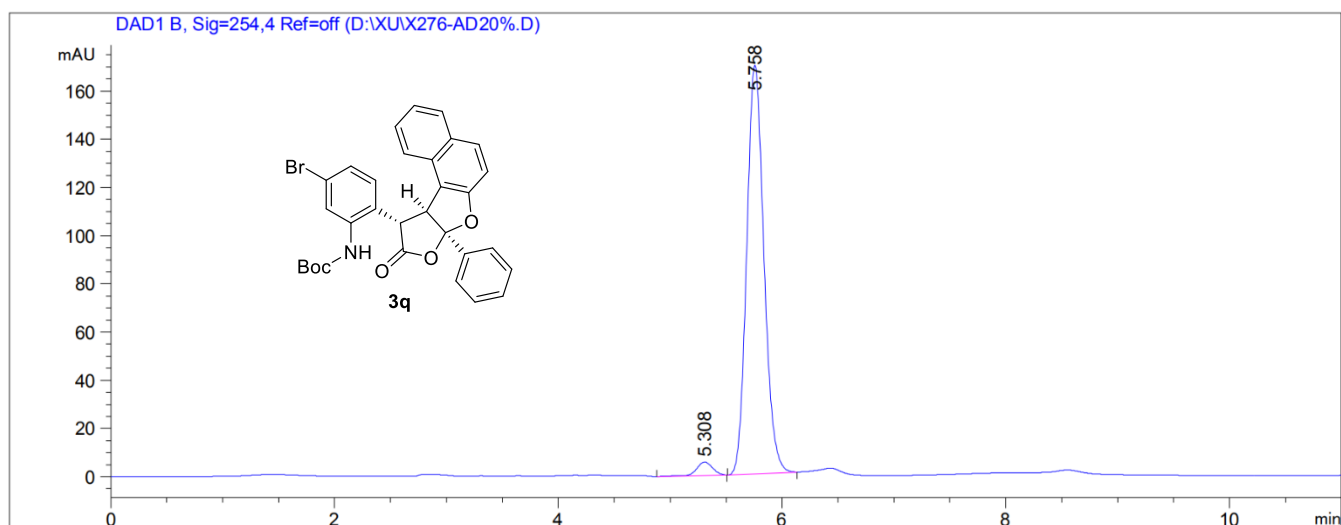

Signal 1: DAD1 B, Sig=254,4 Ref=off

| Peak # | RetTime [min] | Type | Width [min] | Area [mAU*s] | Height [mAU] | Area %  |
|--------|---------------|------|-------------|--------------|--------------|---------|
| 1      | 5.308         | BB   | 0.1544      | 55.99766     | 5.61096      | 3.0068  |
| 2      | 5.758         | BB   | 0.1643      | 1806.34473   | 169.58110    | 96.9932 |

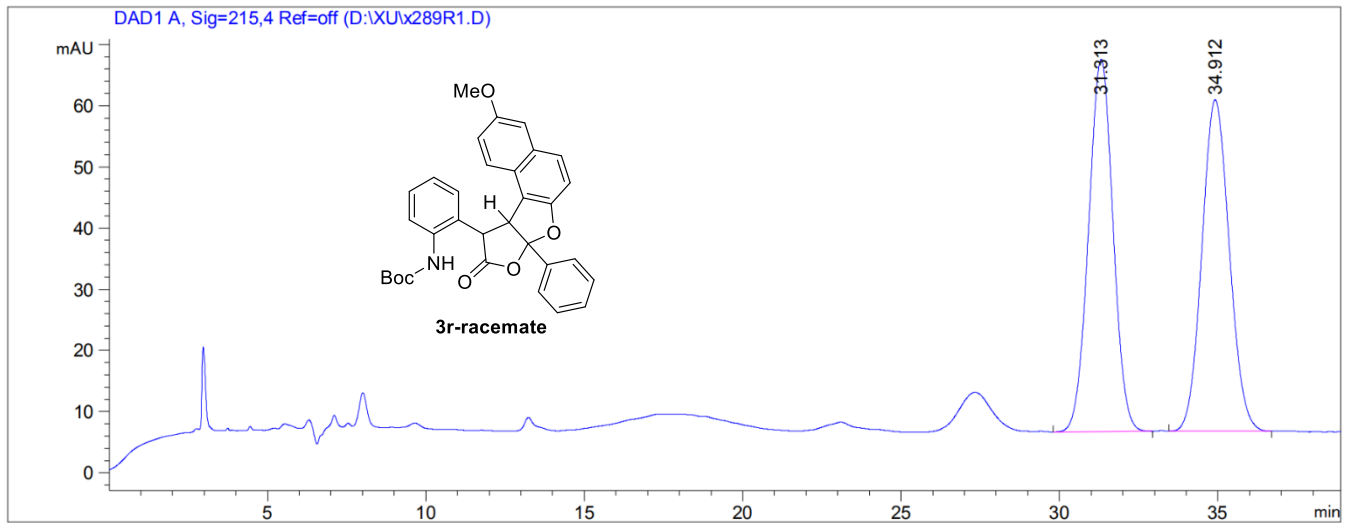

Signal 1: DAD1 A, Sig=215,4 Ref=off

| Peak # | RetTime [min] | Type | Width [min] | Area [mAU*s] | Height [mAU] | Area %  |
|--------|---------------|------|-------------|--------------|--------------|---------|
| 1      | 31.313        | BB   | 0.8376      | 3275.46558   | 60.88692     | 50.1149 |
| 2      | 34.912        | BB   | 0.9380      | 3260.45117   | 54.18291     | 49.8851 |

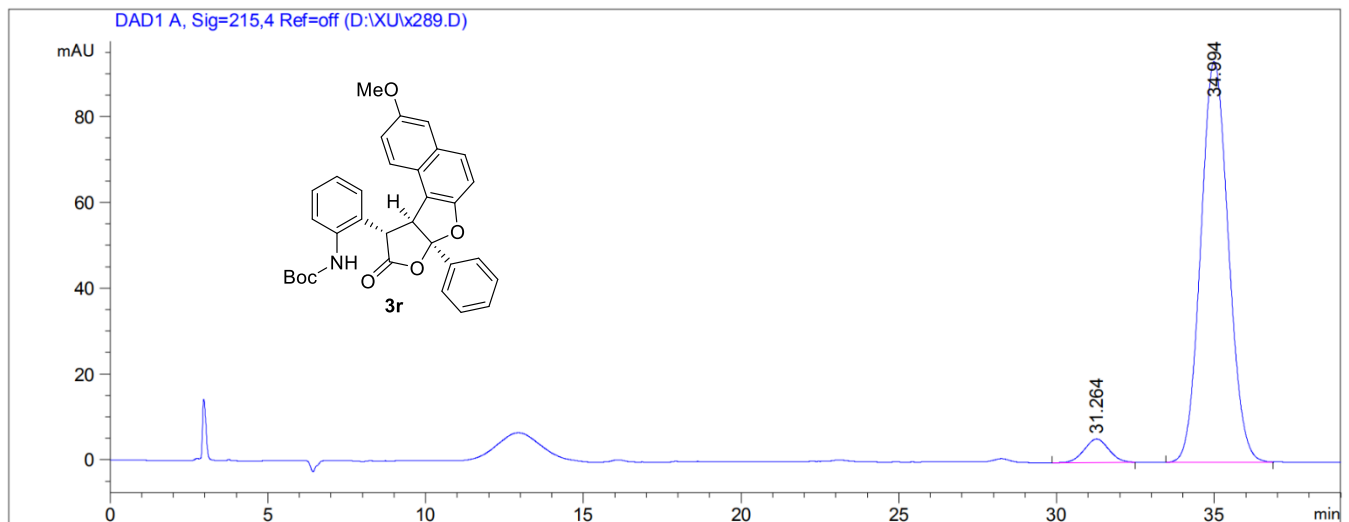

Signal 1: DAD1 A, Sig=215,4 Ref=off

| Peak # | RetTime [min] | Type | Width [min] | Area [mAU*s] | Height [mAU] | Area %  |
|--------|---------------|------|-------------|--------------|--------------|---------|
| 1      | 31.264        | BB   | 0.7772      | 296.21054    | 5.47500      | 4.9449  |
| 2      | 34.994        | BB   | 0.9430      | 5694.05469   | 93.43017     | 95.0551 |

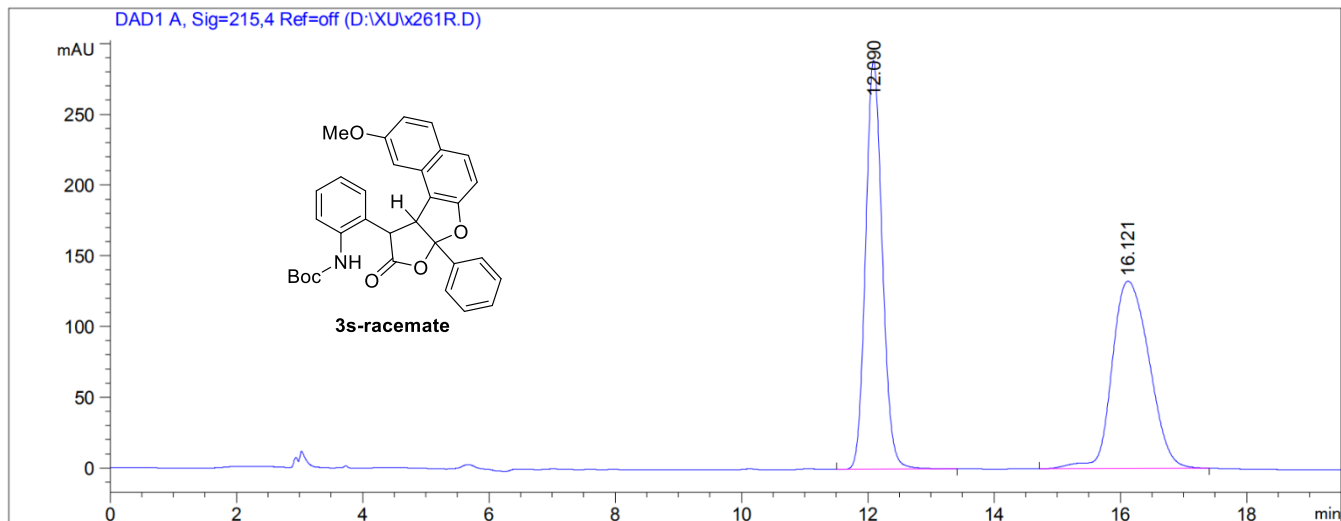

Signal 1: DAD1 A, Sig=215,4 Ref=off

| Peak # | RetTime [min] | Type | Width [min] | Area [mAU*s] | Height [mAU] | Area %  |
|--------|---------------|------|-------------|--------------|--------------|---------|
| 1      | 12.090        | BB   | 0.2845      | 5313.74951   | 289.04984    | 49.5049 |
| 2      | 16.121        | BB   | 0.6613      | 5420.03223   | 132.47444    | 50.4951 |

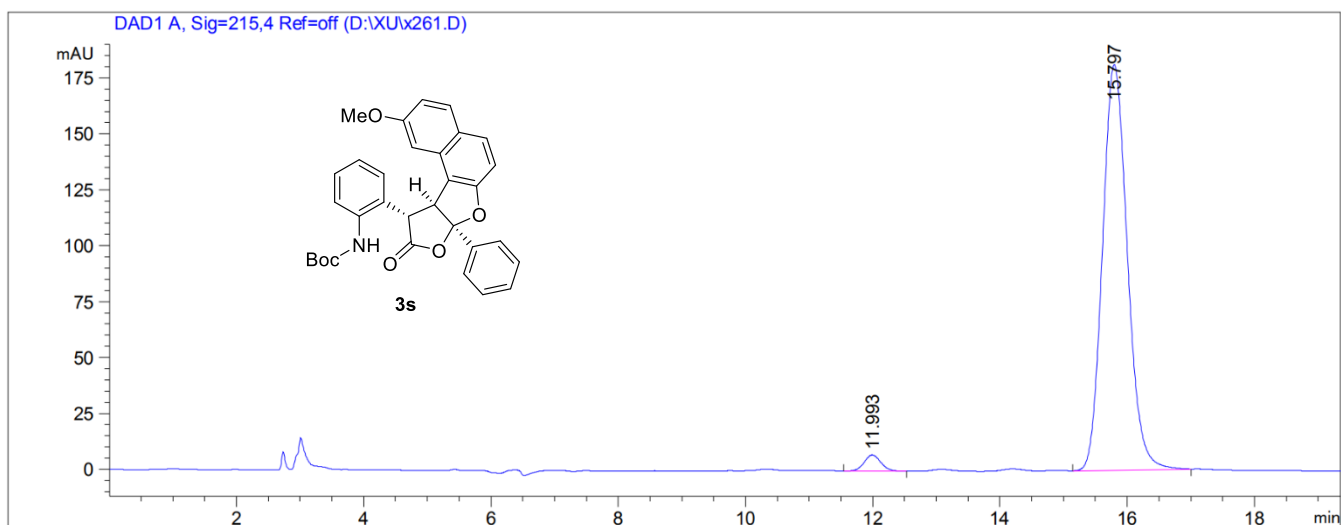

Signal 1: DAD1 A, Sig=215,4 Ref=off

| Peak # | RetTime [min] | Type | Width [min] | Area [mAU*s] | Height [mAU] | Area %  |
|--------|---------------|------|-------------|--------------|--------------|---------|
| 1      | 11.993        | BB   | 0.2819      | 130.53026    | 7.18786      | 2.5850  |
| 2      | 15.797        | BB   | 0.4223      | 4918.98730   | 181.42331    | 97.4150 |

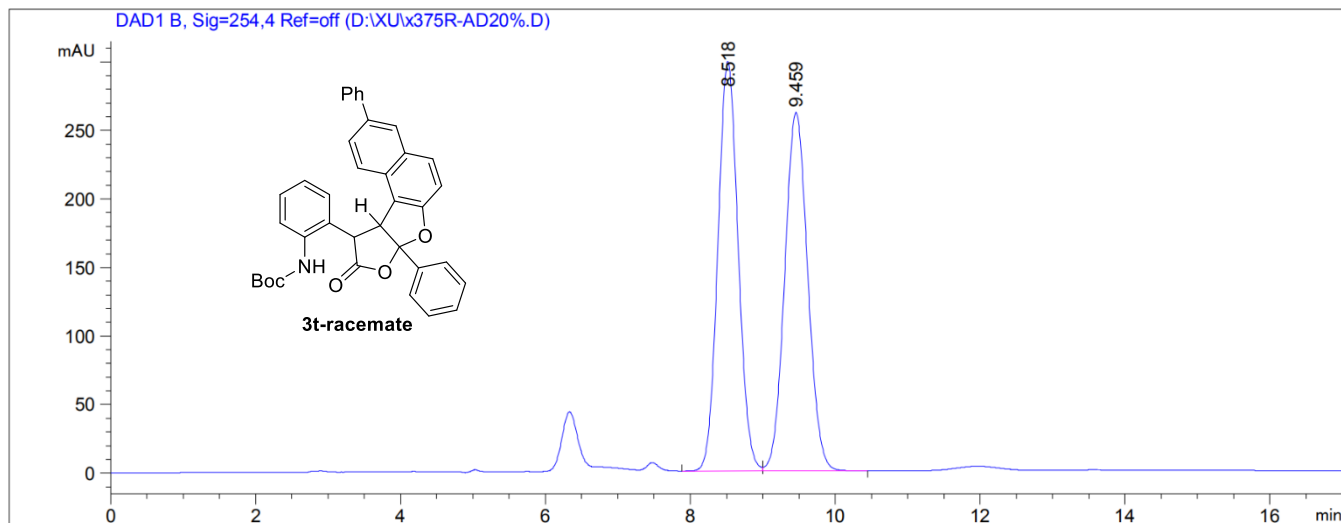

Signal 1: DAD1 B, Sig=254,4 Ref=off

| Peak # | RetTime [min] | Type | Width [min] | Area [mAU*s] | Height [mAU] | Area %  |
|--------|---------------|------|-------------|--------------|--------------|---------|
| 1      | 8.518         | BV   | 0.3029      | 5808.07422   | 298.67532    | 50.1462 |
| 2      | 9.459         | VB   | 0.3436      | 5774.21289   | 261.48273    | 49.8538 |

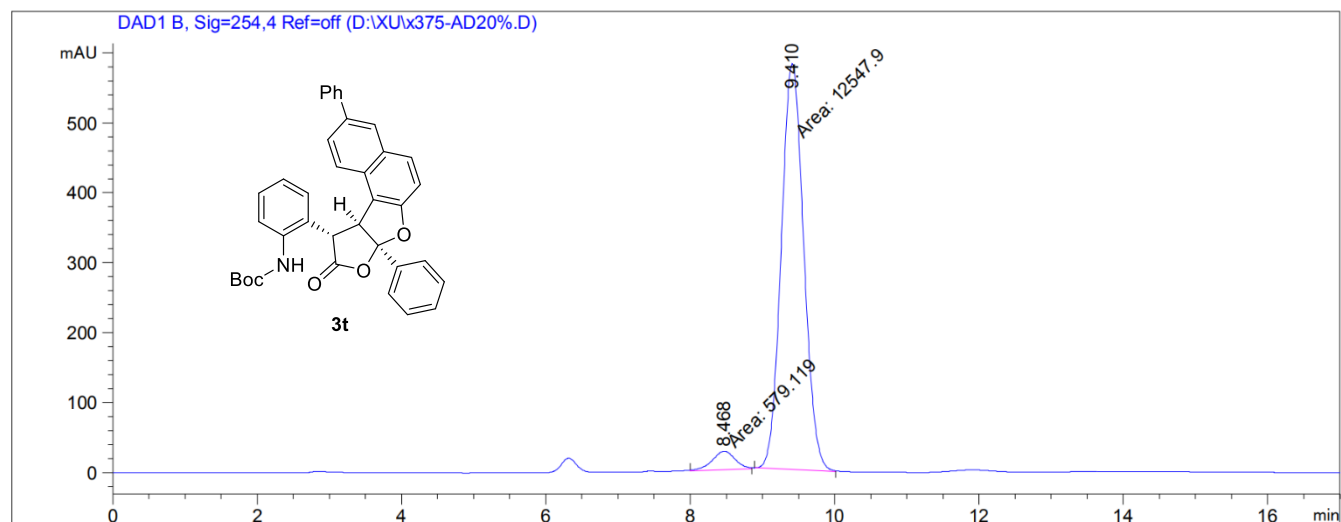

Signal 1: DAD1 B, Sig=254,4 Ref=off

| Peak # | RetTime [min] | Type | Width [min] | Area [mAU*s] | Height [mAU] | Area %  |
|--------|---------------|------|-------------|--------------|--------------|---------|
| 1      | 8.468         | MM   | 0.3670      | 579.11859    | 26.30059     | 4.4117  |
| 2      | 9.410         | MM   | 0.3604      | 1.25479e4    | 580.34650    | 95.5883 |

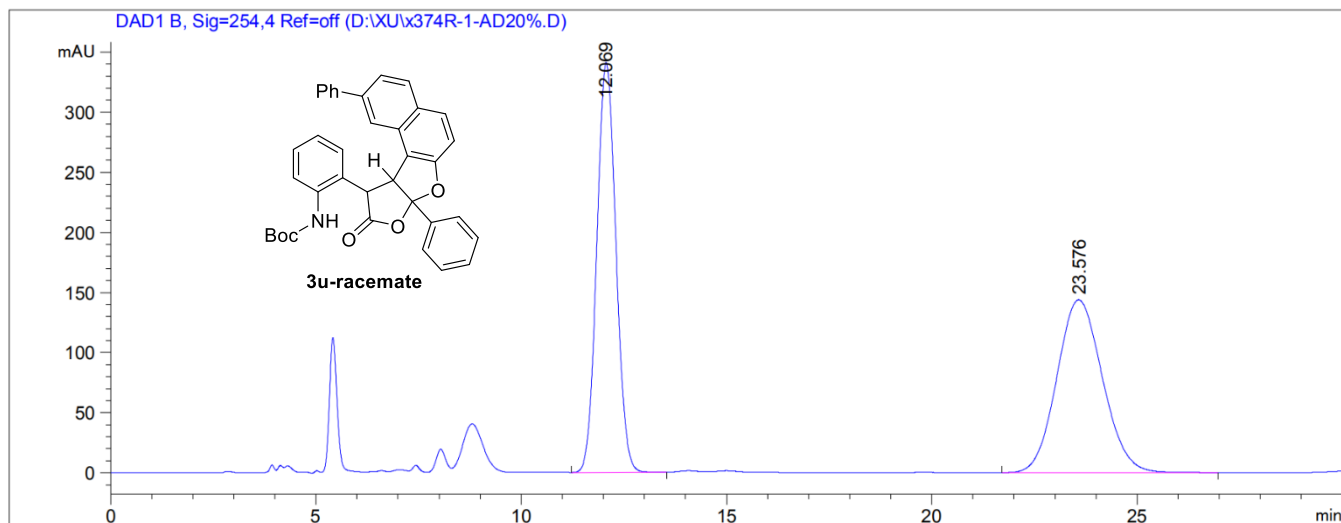

Signal 1: DAD1 B, Sig=254,4 Ref=off

| Peak # | RetTime [min] | Type | Width [min] | Area [mAU*s] | Height [mAU] | Area %  |
|--------|---------------|------|-------------|--------------|--------------|---------|
| 1      | 12.069        | BB   | 0.5056      | 1.10430e4    | 341.15945    | 49.8818 |
| 2      | 23.576        | BB   | 1.1966      | 1.10953e4    | 143.73357    | 50.1182 |

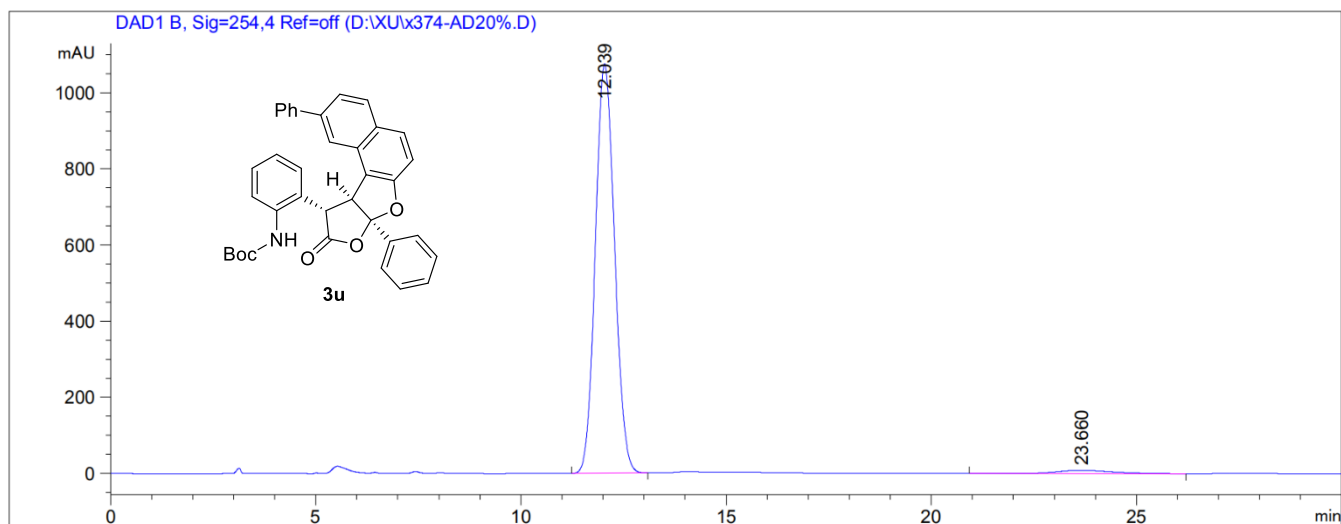

Signal 1: DAD1 B, Sig=254,4 Ref=off

| Peak # | RetTime [min] | Type | Width [min] | Area [mAU*s] | Height [mAU] | Area %  |
|--------|---------------|------|-------------|--------------|--------------|---------|
| 1      | 12.039        | BB   | 0.5092      | 3.49628e4    | 1075.69470   | 97.6250 |
| 2      | 23.660        | BB   | 1.1464      | 850.58002    | 8.77862      | 2.3750  |

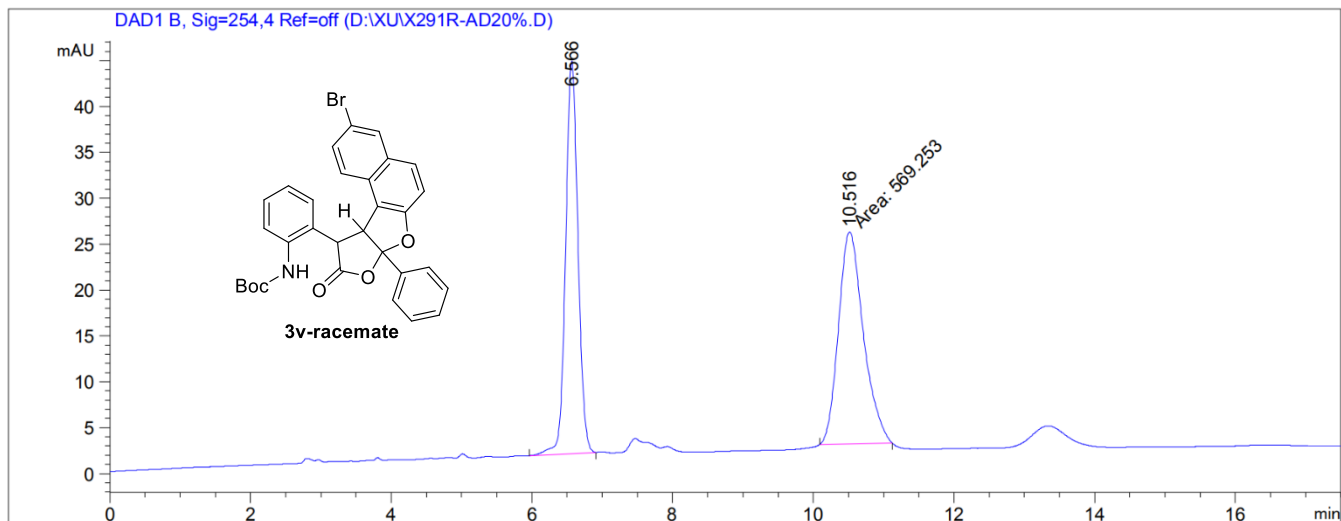

Signal 1: DAD1 B, Sig=254,4 Ref=off

| Peak # | RetTime [min] | Type | Width [min] | Area [mAU*s] | Height [mAU] | Area %  |
|--------|---------------|------|-------------|--------------|--------------|---------|
| 1      | 6.566         | BB   | 0.1885      | 522.11163    | 42.74889     | 47.8403 |
| 2      | 10.516        | MM   | 0.4104      | 569.25281    | 23.11877     | 52.1597 |

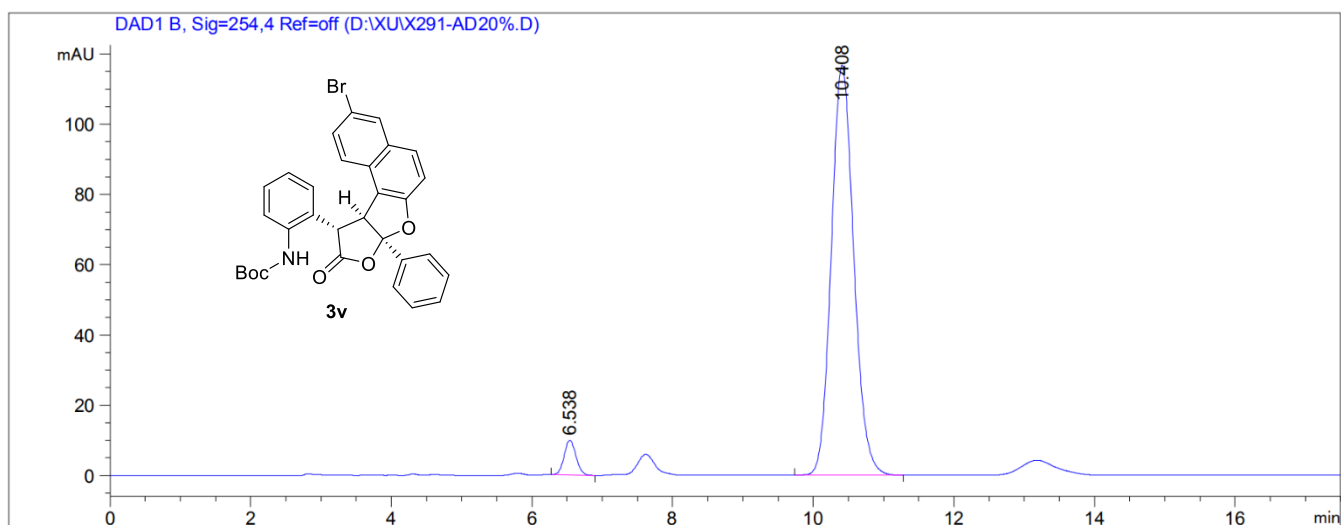

Signal 1: DAD1 B, Sig=254,4 Ref=off

| Peak # | RetTime [min] | Type | Width [min] | Area [mAU*s] | Height [mAU] | Area %  |
|--------|---------------|------|-------------|--------------|--------------|---------|
| 1      | 6.538         | BB   | 0.1811      | 114.34937    | 9.87792      | 4.2349  |
| 2      | 10.408        | BB   | 0.3425      | 2585.78979   | 116.71417    | 95.7651 |

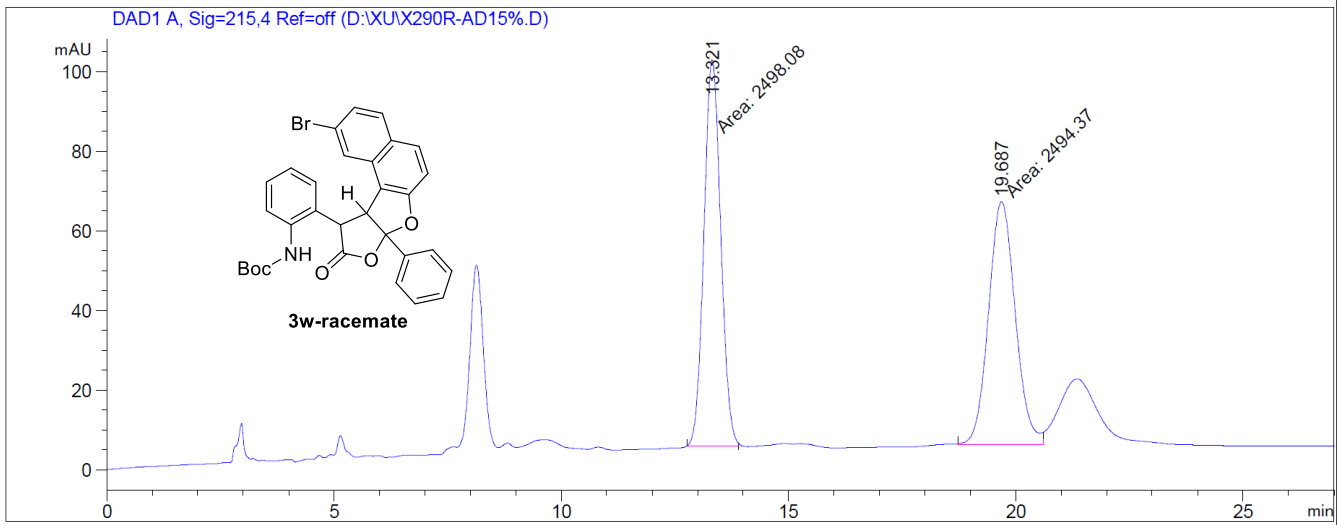

Signal 1: DAD1 A, Sig=215,4 Ref=off

| Peak # | RetTime [min] | Type | Width [min] | Area [mAU*s] | Height [mAU] | Area %  |
|--------|---------------|------|-------------|--------------|--------------|---------|
| 1      | 13.321        | MM   | 0.4285      | 2498.08228   | 97.15487     | 50.0372 |
| 2      | 19.687        | MF   | 0.6814      | 2494.37134   | 61.00734     | 49.9628 |

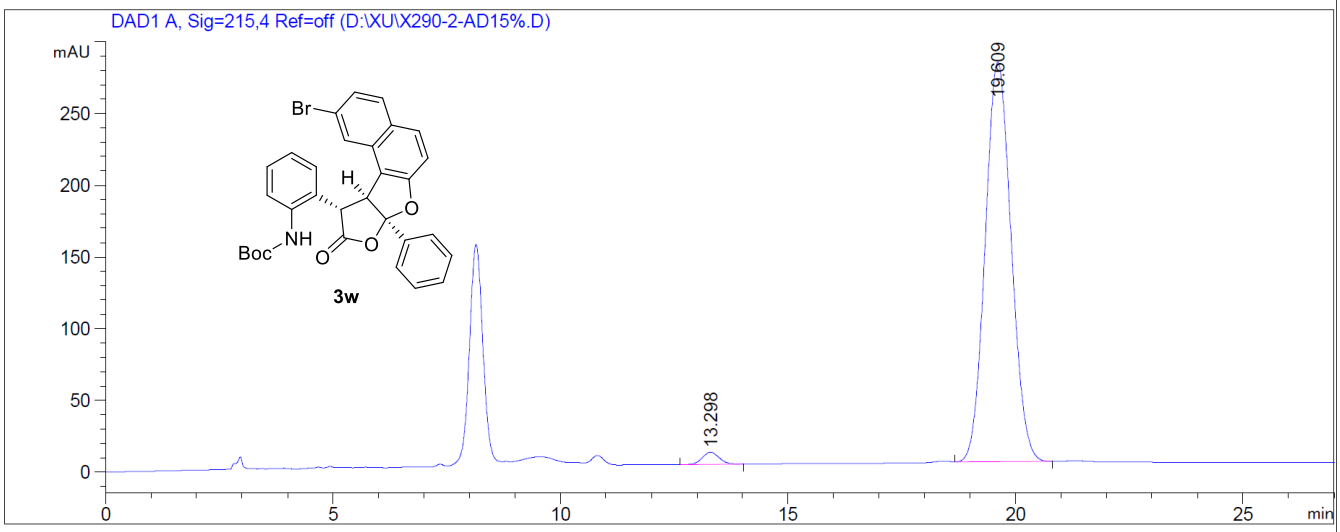

Signal 1: DAD1 A, Sig=215,4 Ref=off

| Peak # | RetTime [min] | Type | Width [min] | Area [mAU*s] | Height [mAU] | Area %  |
|--------|---------------|------|-------------|--------------|--------------|---------|
| 1      | 13.298        | BB   | 0.3965      | 215.83185    | 8.43613      | 1.9162  |
| 2      | 19.609        | BB   | 0.6207      | 1.10476e4    | 278.56210    | 98.0838 |

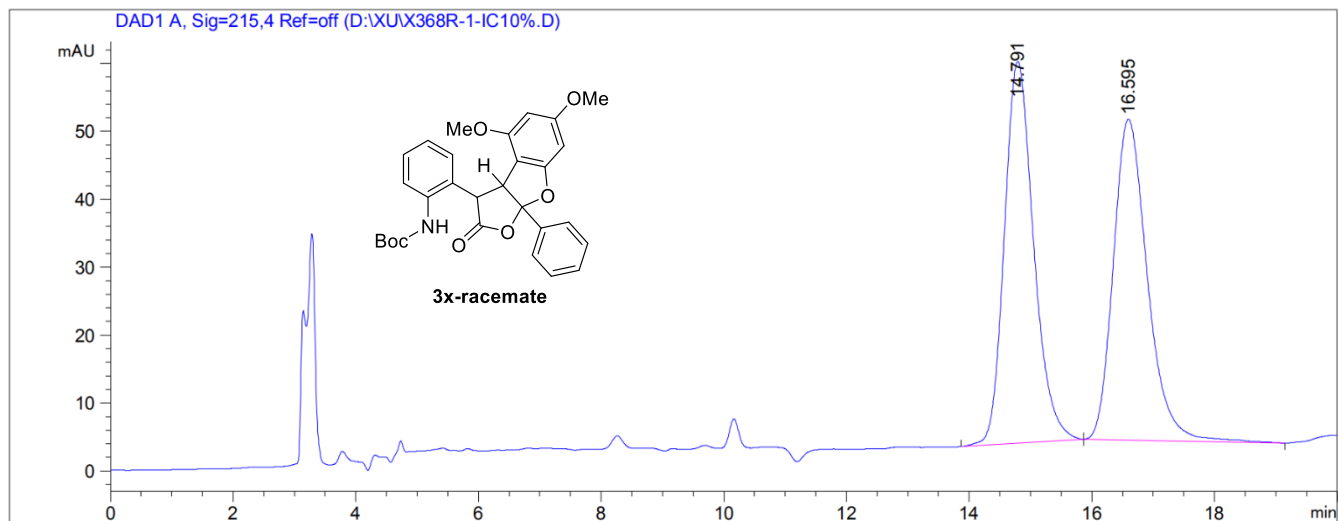

Signal 1: DAD1 A, Sig=215,4 Ref=off

| Peak # | RetTime [min] | Type | Width [min] | Area [mAU*s] | Height [mAU] | Area %  |
|--------|---------------|------|-------------|--------------|--------------|---------|
| 1      | 14.791        | BB   | 0.5086      | 1860.69177   | 56.15201     | 50.5118 |
| 2      | 16.595        | BB   | 0.5924      | 1822.98694   | 47.22077     | 49.4882 |

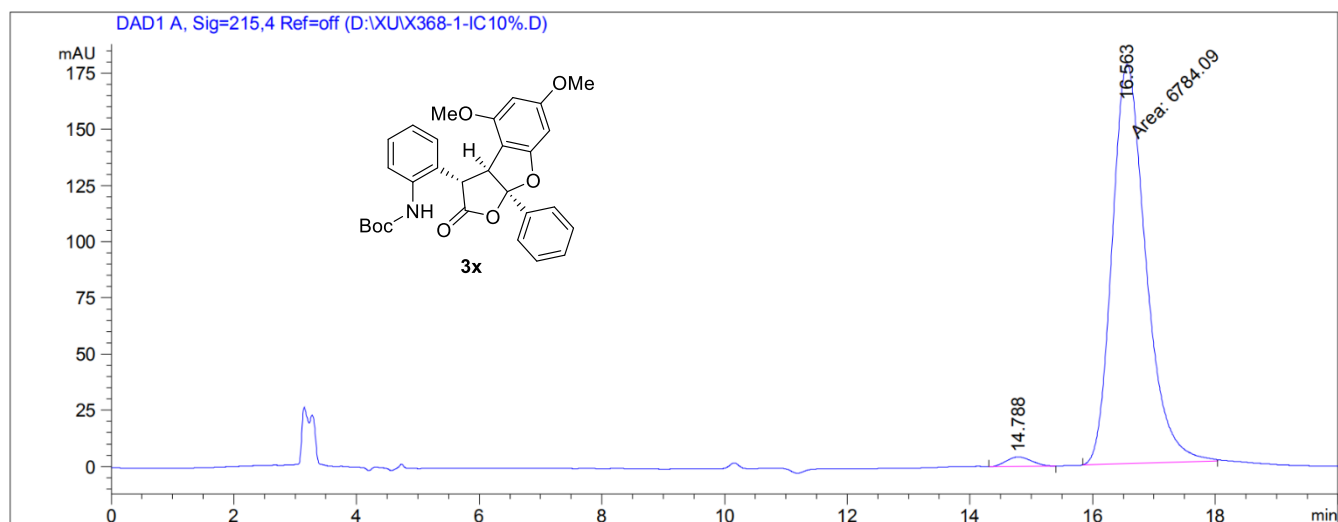

Signal 1: DAD1 A, Sig=215,4 Ref=off

| Peak # | RetTime [min] | Type | Width [min] | Area [mAU*s] | Height [mAU] | Area %  |
|--------|---------------|------|-------------|--------------|--------------|---------|
| 1      | 14.788        | BB   | 0.4402      | 117.89622    | 4.16496      | 1.7082  |
| 2      | 16.563        | MM   | 0.6362      | 6784.08643   | 177.73055    | 98.2918 |



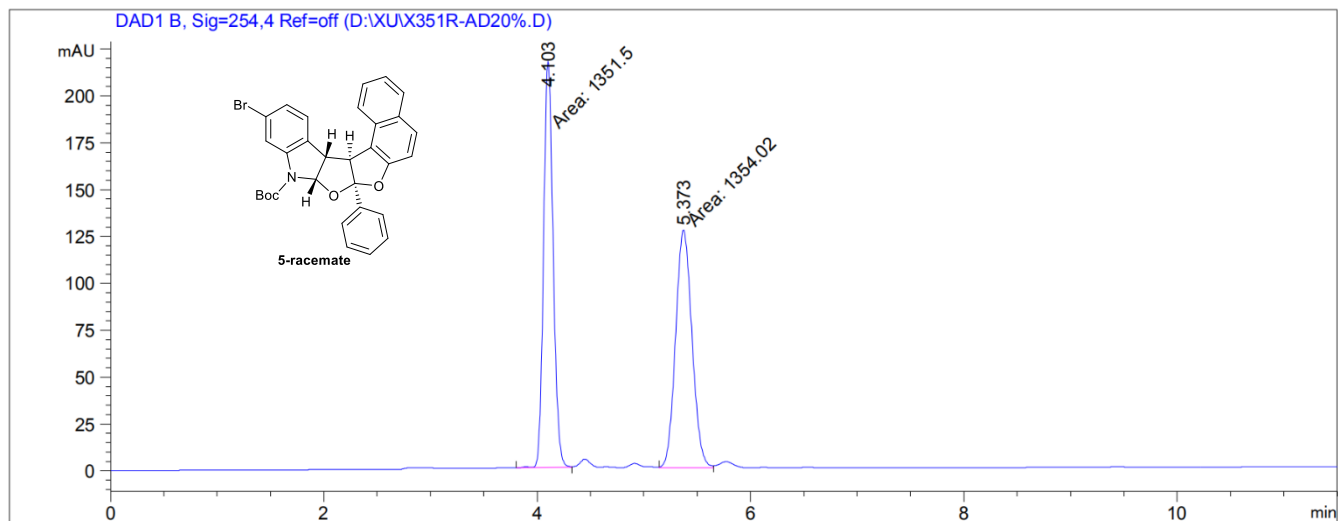

Signal 1: DAD1 B, Sig=254,4 Ref=off

| Peak # | RetTime [min] | Type | Width [min] | Area [mAU*s] | Height [mAU] | Area %  |
|--------|---------------|------|-------------|--------------|--------------|---------|
| 1      | 4.103         | MF   | 0.1037      | 1351.50342   | 217.17780    | 49.9534 |
| 2      | 5.373         | MF   | 0.1779      | 1354.02271   | 126.83463    | 50.0466 |

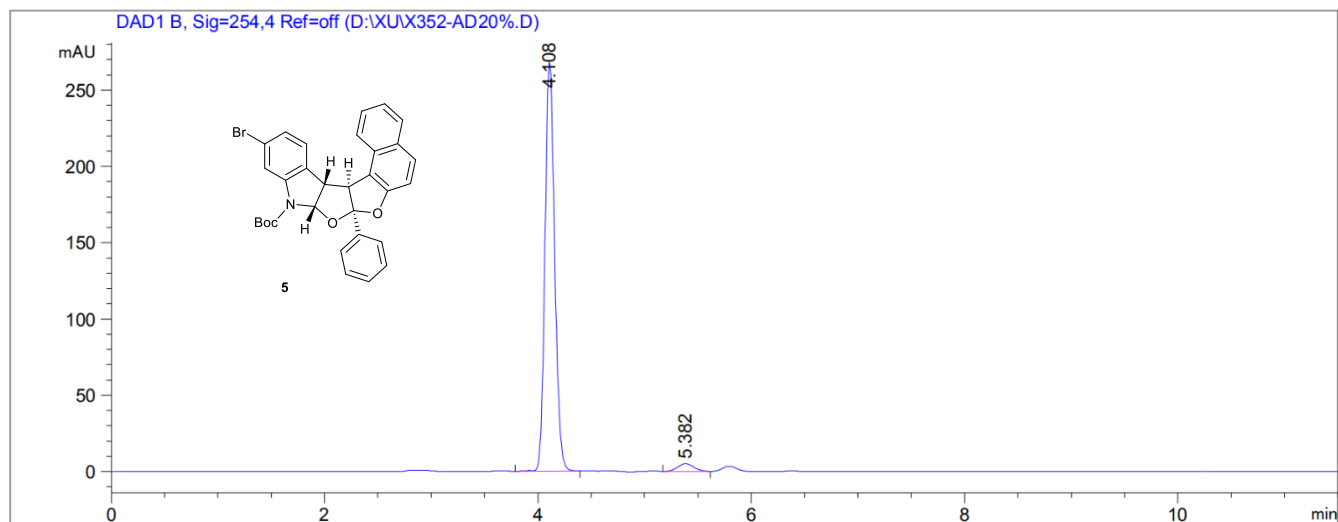

Signal 1: DAD1 B, Sig=254,4 Ref=off

| Peak # | RetTime [min] | Type | Width [min] | Area [mAU*s] | Height [mAU] | Area %  |
|--------|---------------|------|-------------|--------------|--------------|---------|
| 1      | 4.108         | BB   | 0.0975      | 1690.20386   | 268.19348    | 96.9612 |
| 2      | 5.382         | BV   | 0.1648      | 52.97248     | 5.03389      | 3.0388  |
